# Supplementary material for: Heterogeneous gold-catalyzed Sandmeyer coupling of aryldiazonium salts with sodium bromide or thiols for constructing C–Br and C–S bonds
Source: Royal Society of Chemistry journal article supplement (doi:10.1039/d3dt00888f), 2023-01-01
Supplement: d3dt00888f1.pdf [file d3dt00888f1.pdf]

## Supporting Information for:

### **Heterogeneous gold-catalyzed Sandmeyer coupling of aryl diazonium salts with sodium bromide or thiols for constructing C–Br and C–S bonds**

Jiajia Li, Jiajun Zeng, Wenyan Hao,\* Mingzhong Cai\*

*Key Lab of Fluorine and Silicon for Energy Materials and Chemistry of Ministry of Education and College of Chemistry & Chemical Engineering, Jiangxi Normal University, Nanchang 330022, China*

E-mail: wenyanhao@jxnu.edu.cn; mzcai@jxnu.edu.cn

**Copies of NMR Spectra of Compounds 2a-2t and 4a-4c'**

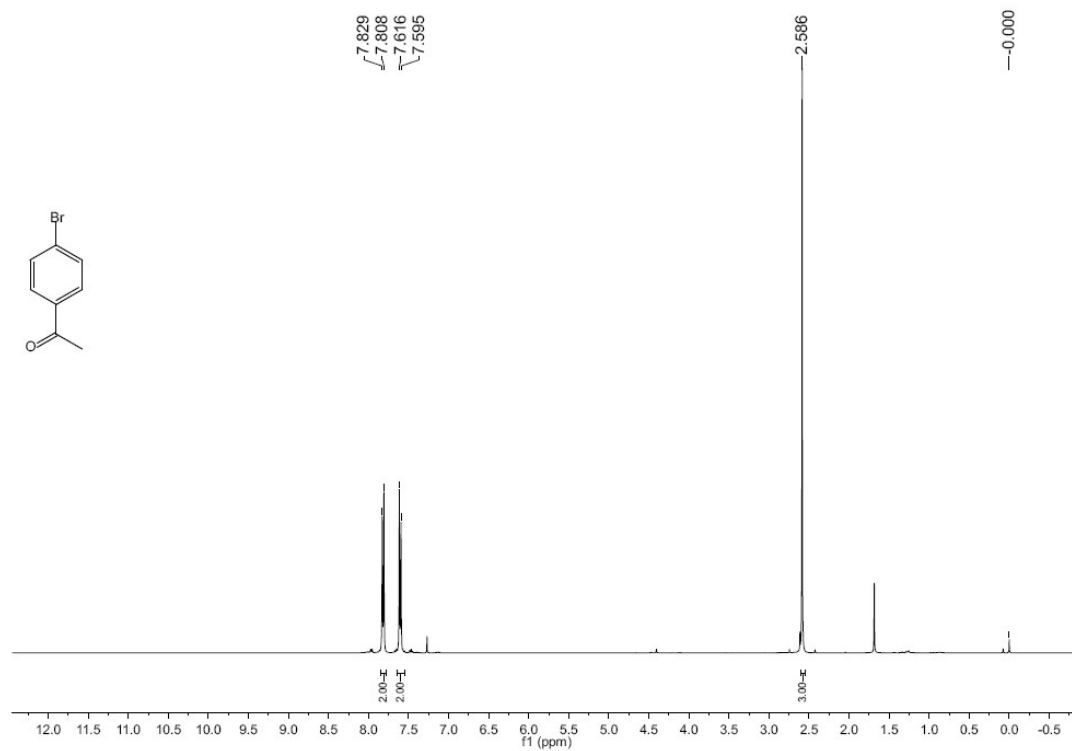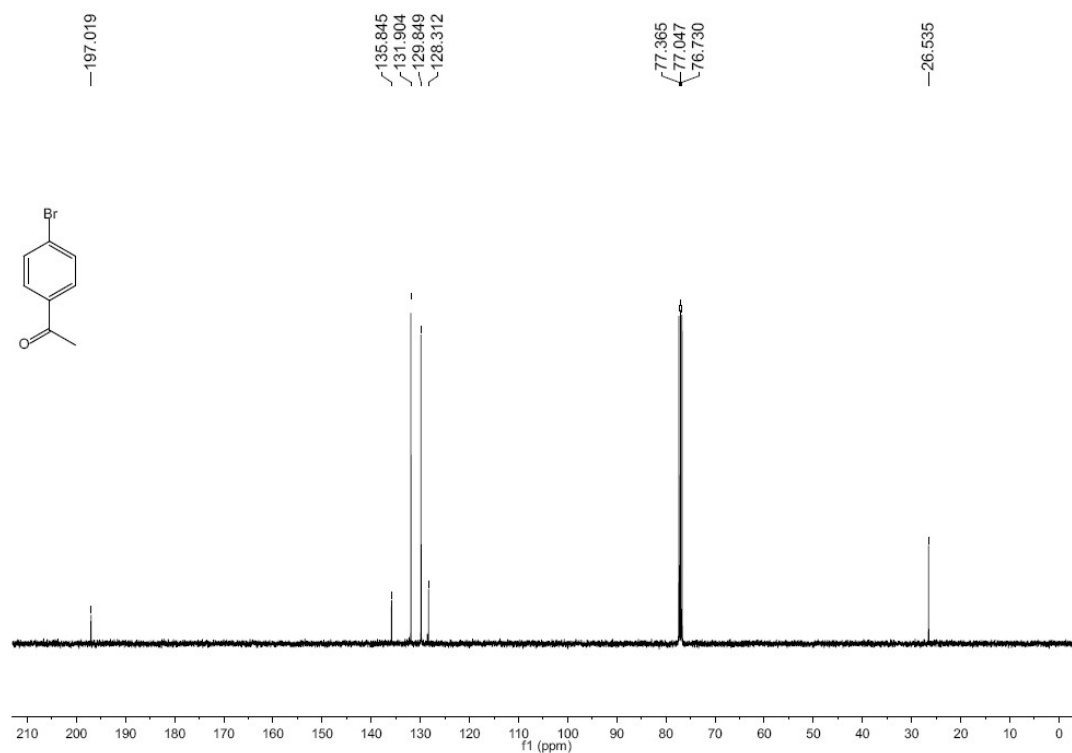

$^1\text{H}$  NMR and  $^{13}\text{C}$  NMR spectra of compounds **2a** (in  $\text{CDCl}_3$ )

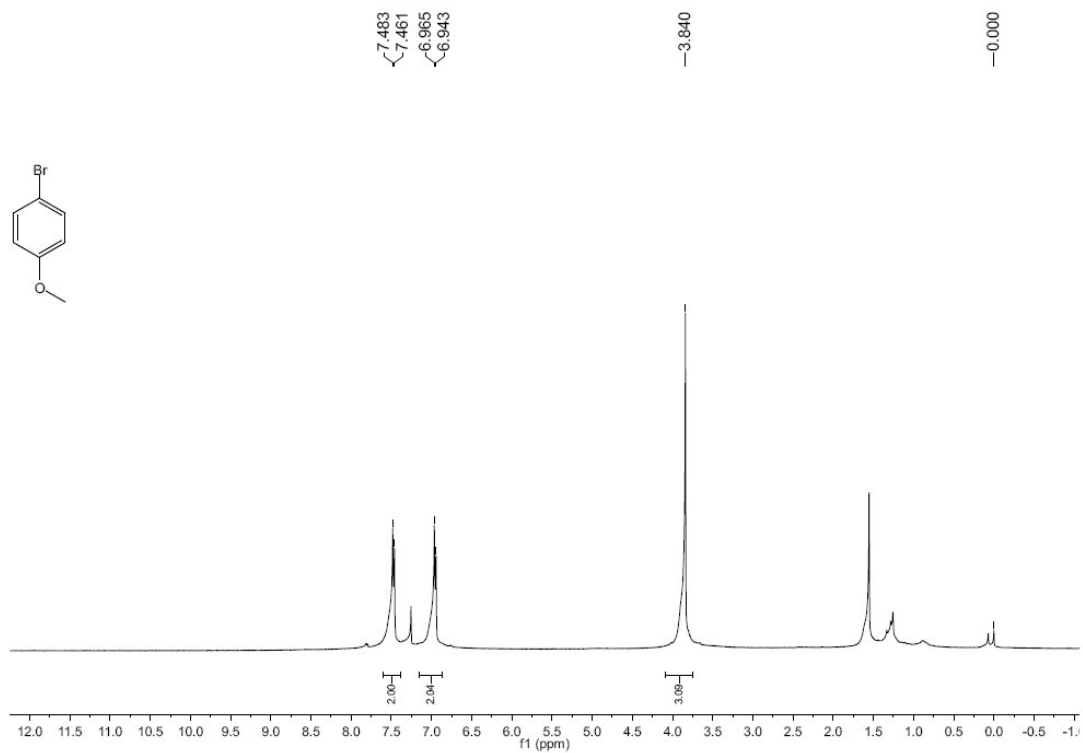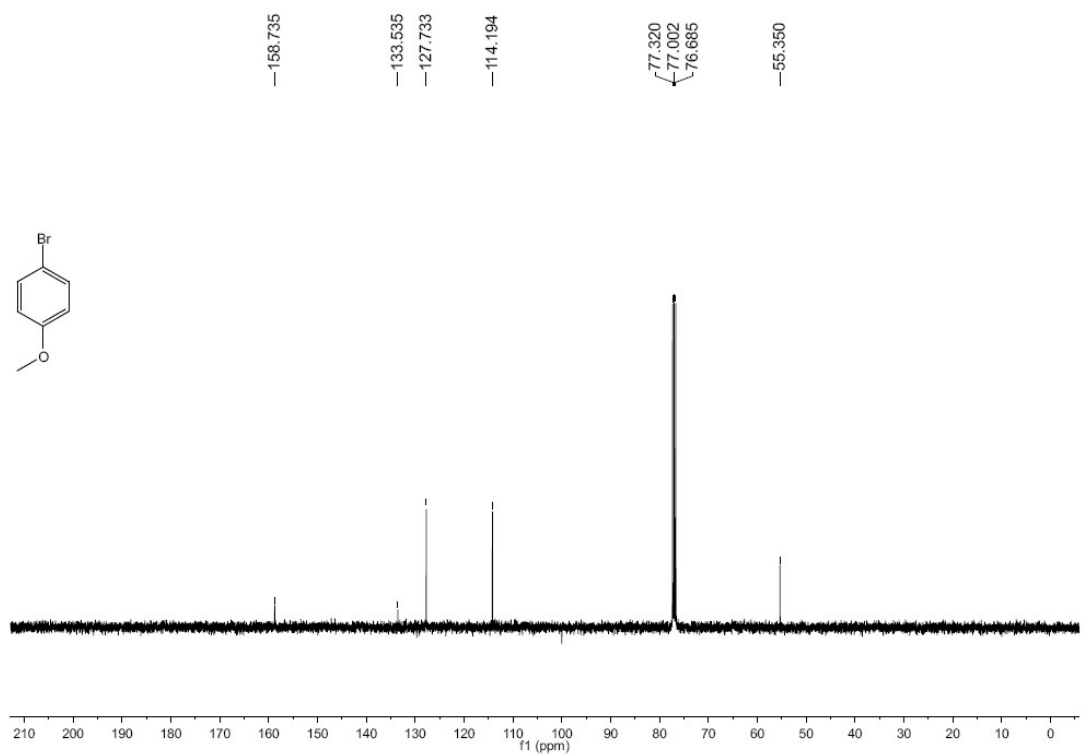

$^1\text{H}$  NMR and  $^{13}\text{C}$  NMR spectra of compounds **2b** (in  $\text{CDCl}_3$ )

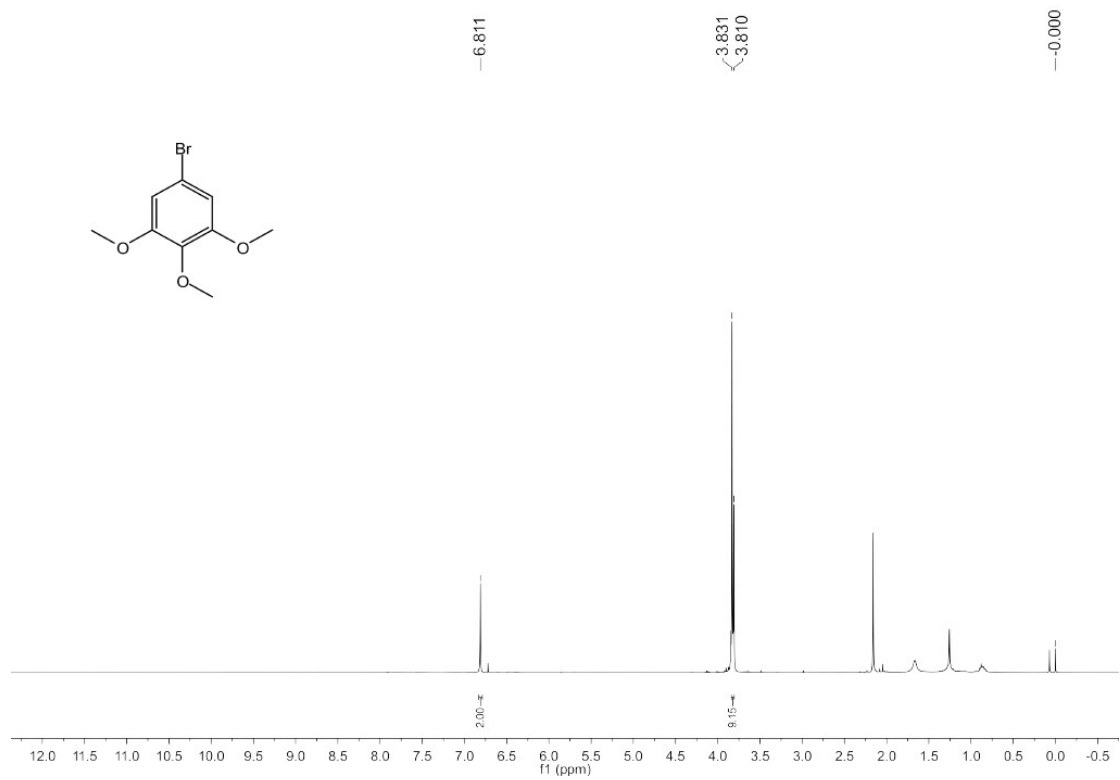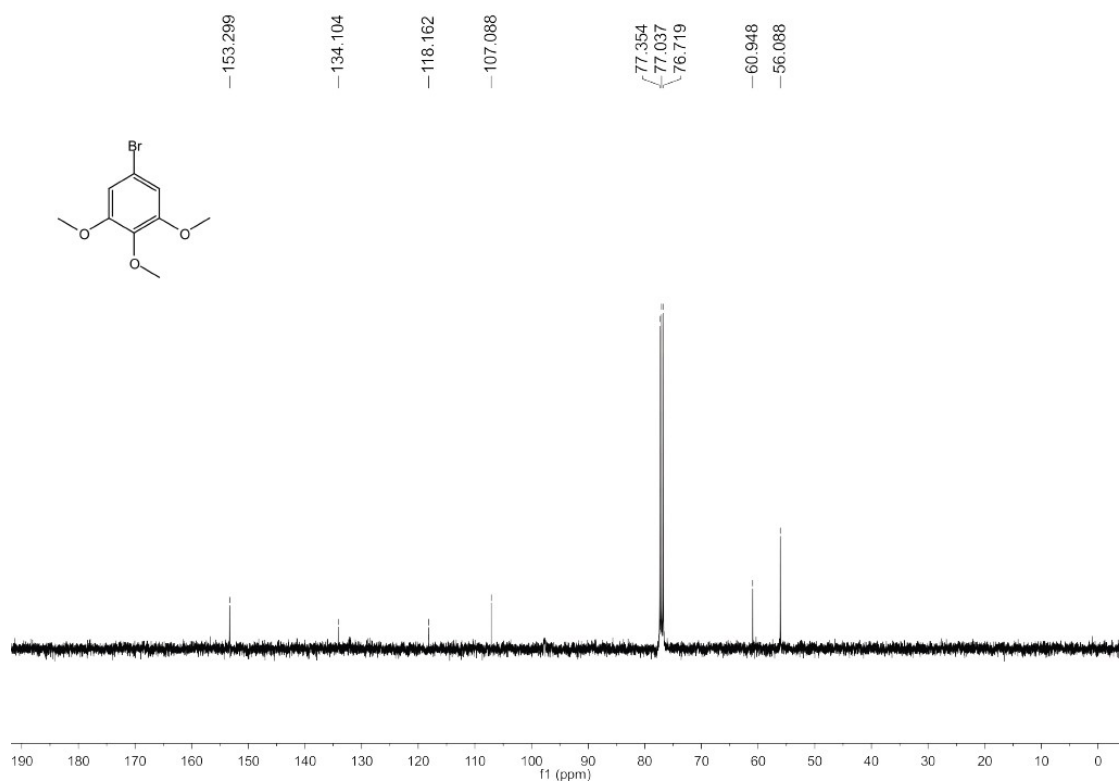

$^1\text{H}$  NMR and  $^{13}\text{C}$  NMR spectra of compounds **2c** (in  $\text{CDCl}_3$ )

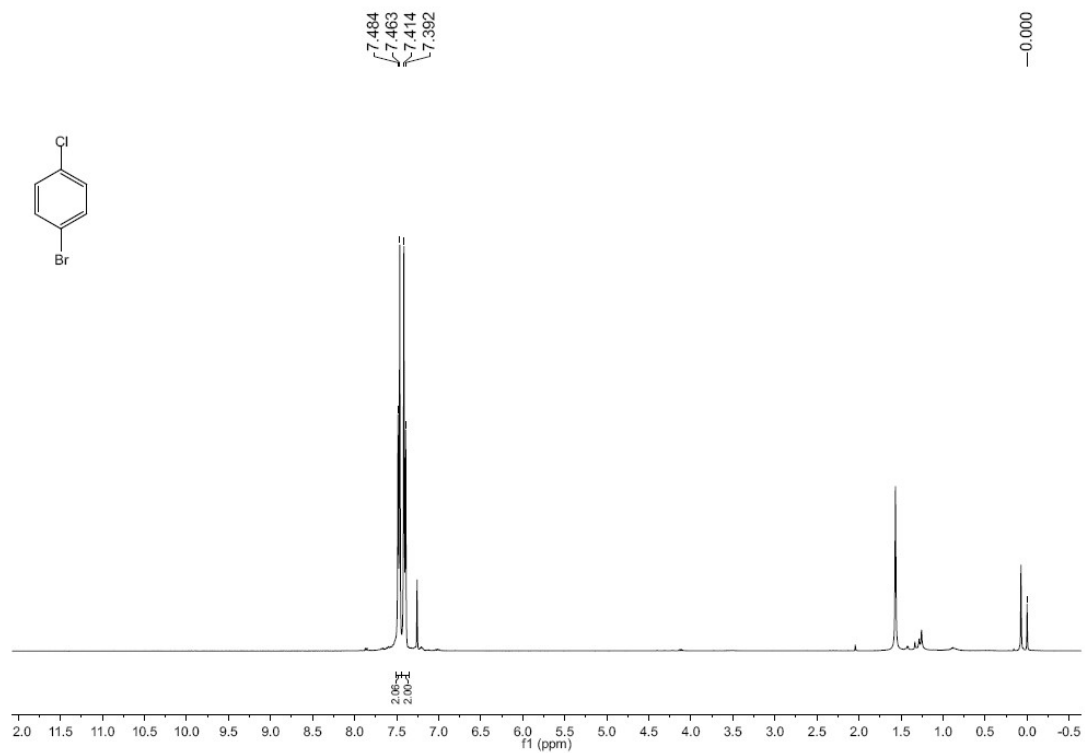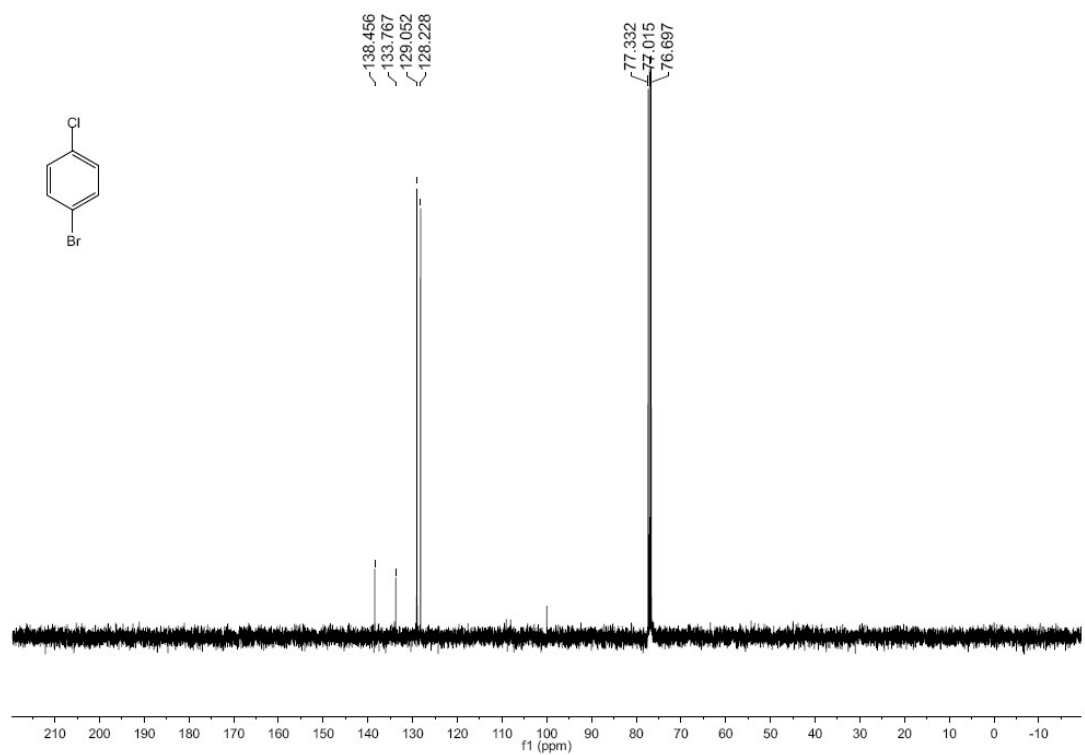

$^1\text{H}$  NMR and  $^{13}\text{C}$  NMR spectra of compounds **2d** (in  $\text{CDCl}_3$ )

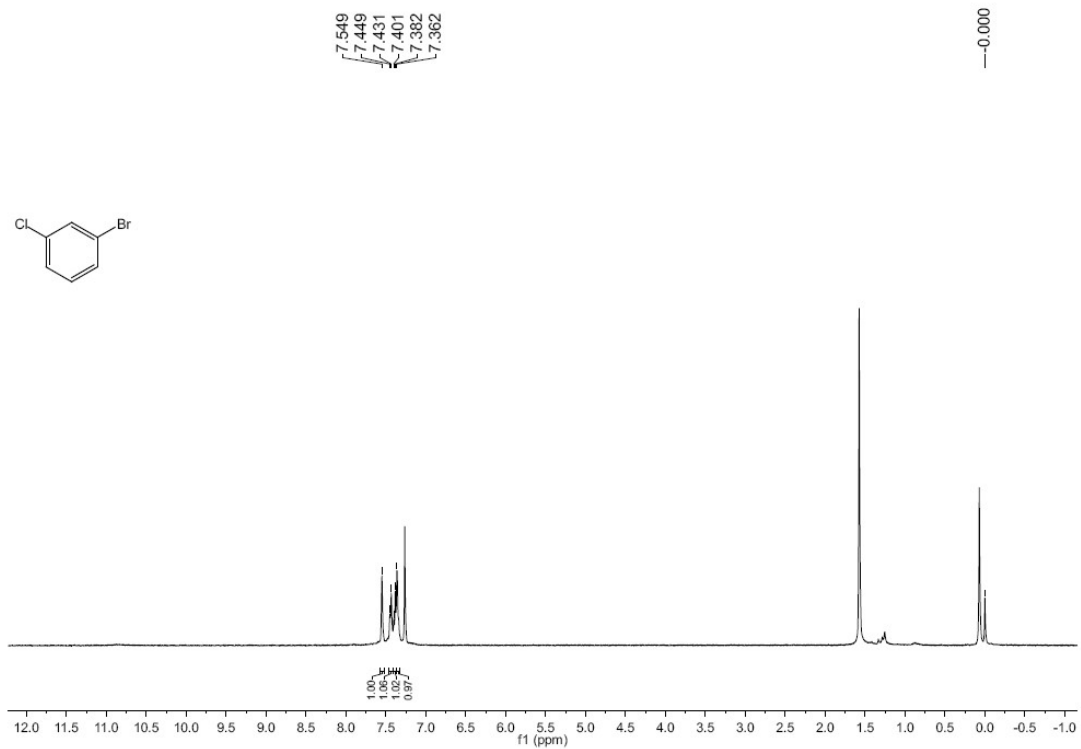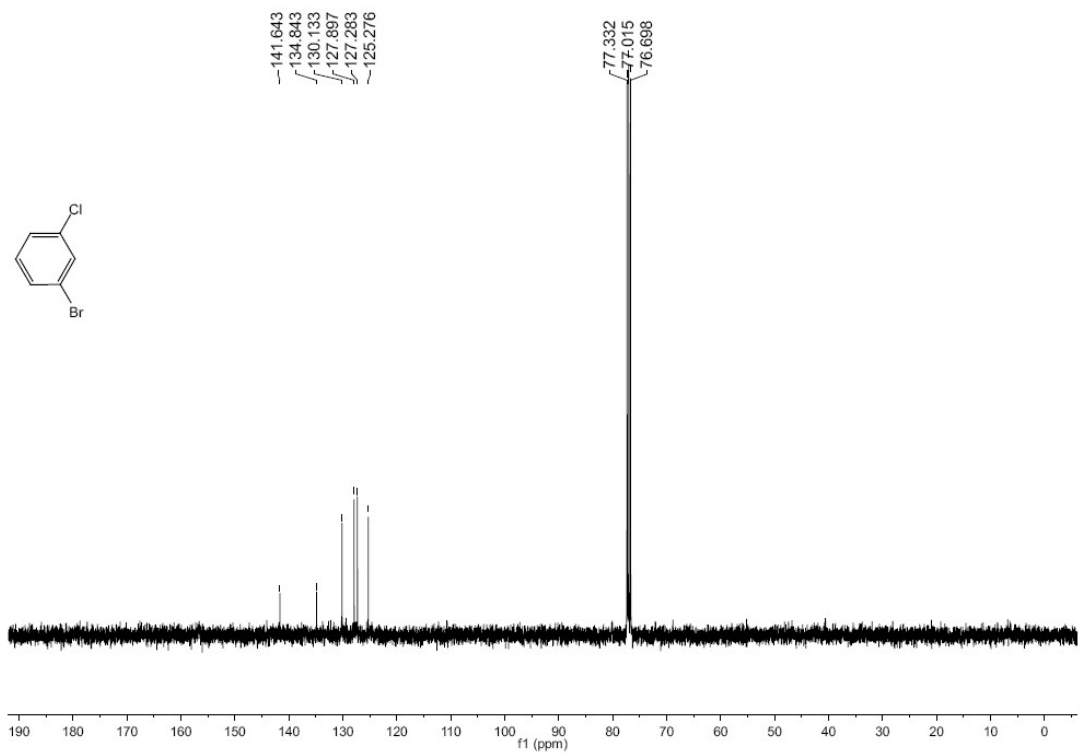

$^1\text{H}$  NMR and  $^{13}\text{C}$  NMR spectra of compounds **2e** (in  $\text{CDCl}_3$ )

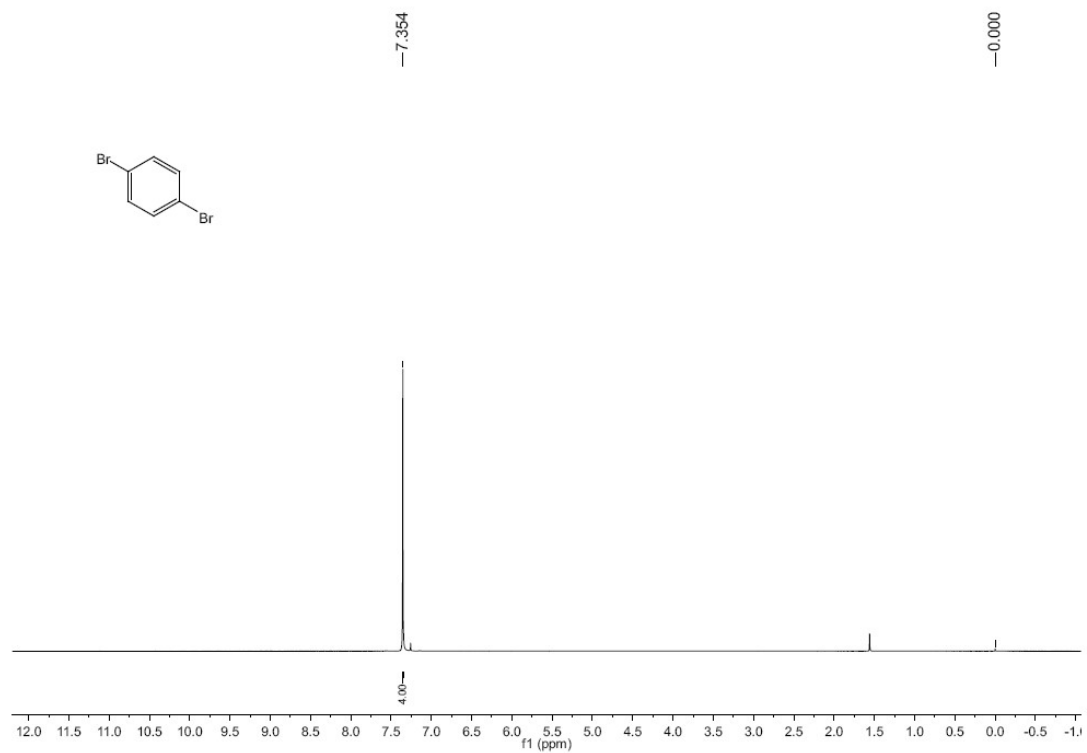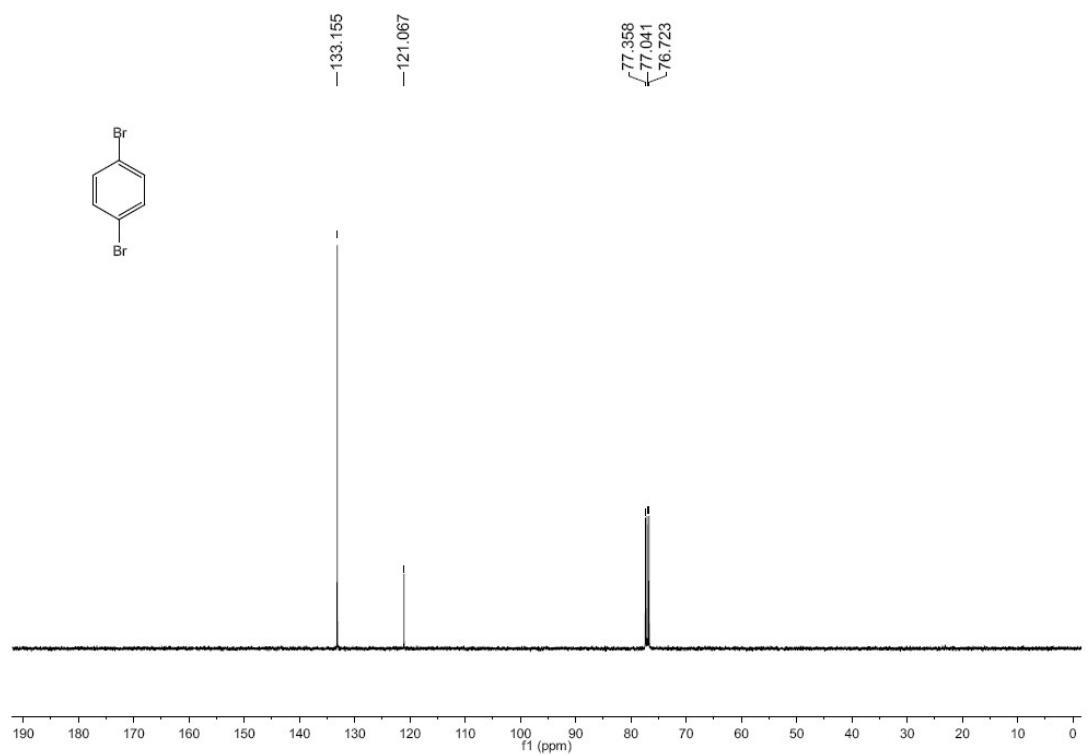

<sup>1</sup>H NMR and <sup>13</sup>C NMR spectra of compounds **2f** (in CDCl<sub>3</sub>)

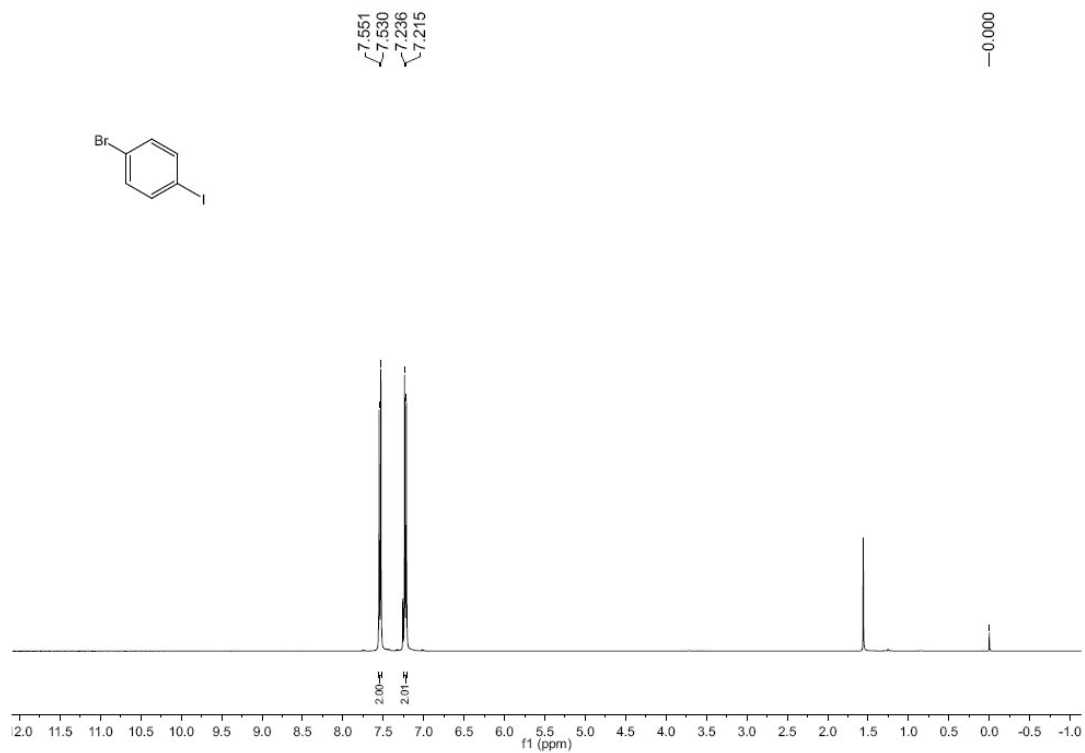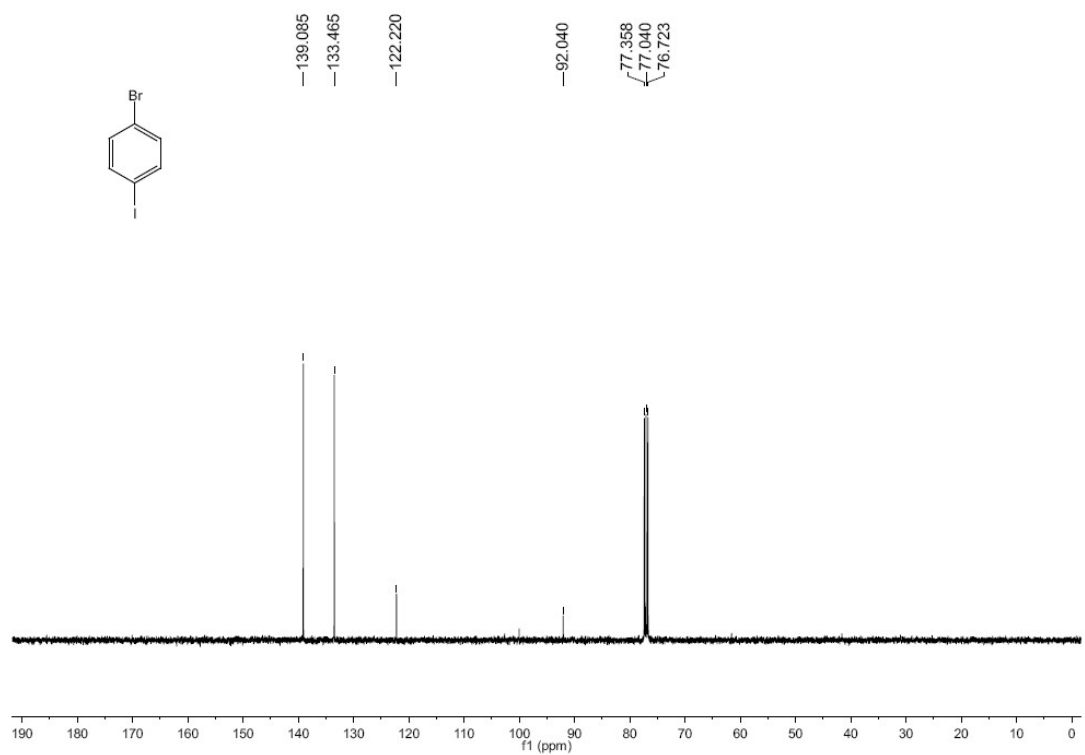

$^1\text{H}$  NMR and  $^{13}\text{C}$  NMR spectra of compounds **2g** (in  $\text{CDCl}_3$ )



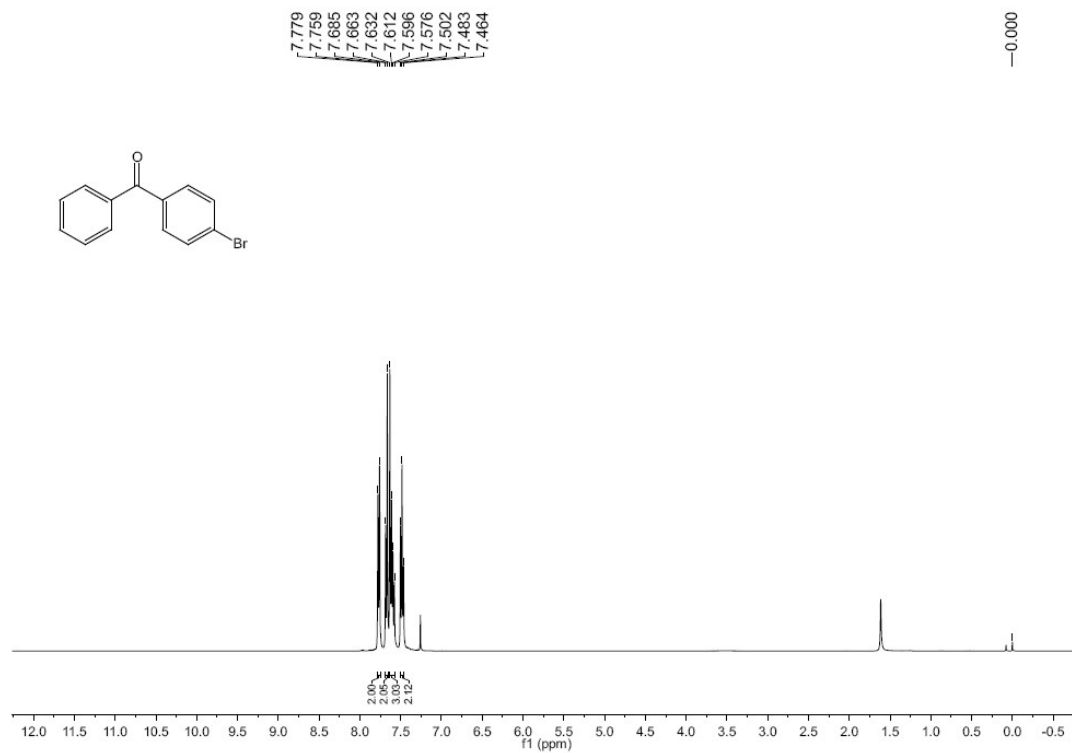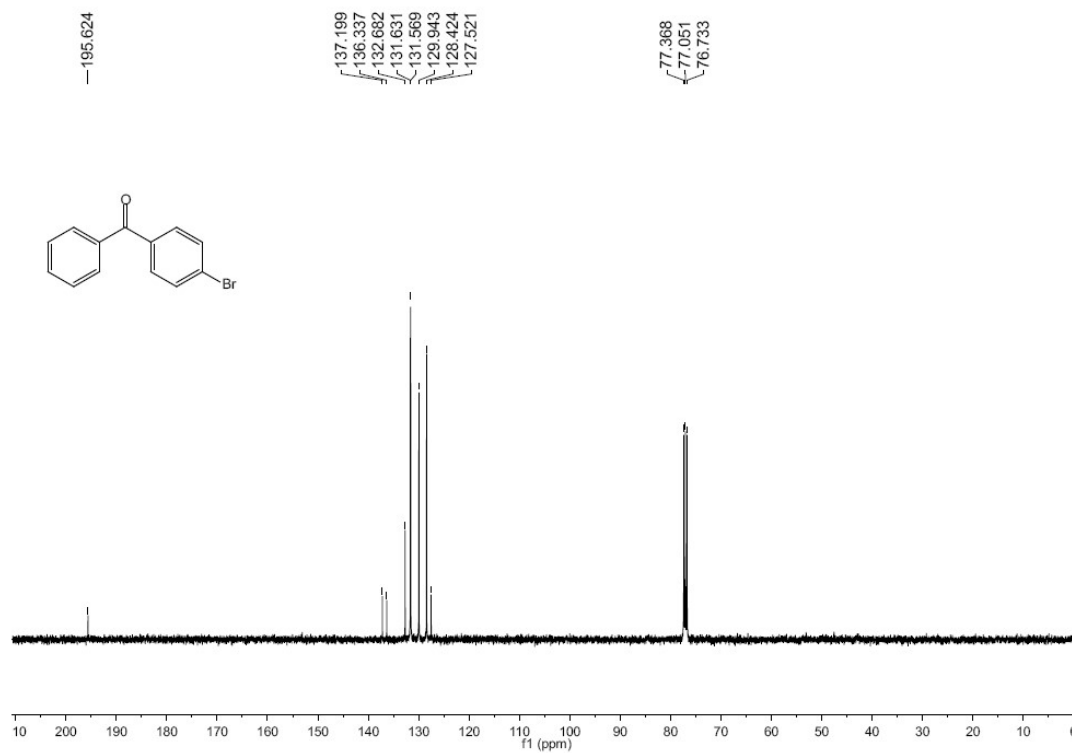

$^1\text{H}$  NMR and  $^{13}\text{C}$  NMR spectra of compounds **2h** (in  $\text{CDCl}_3$ )

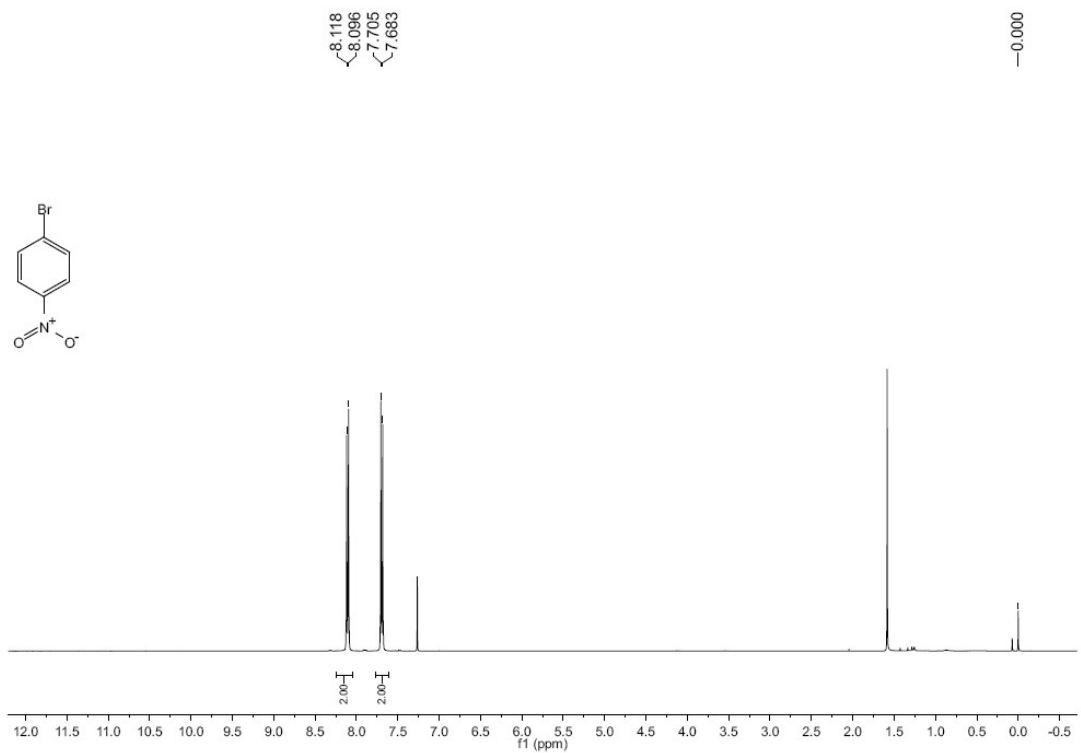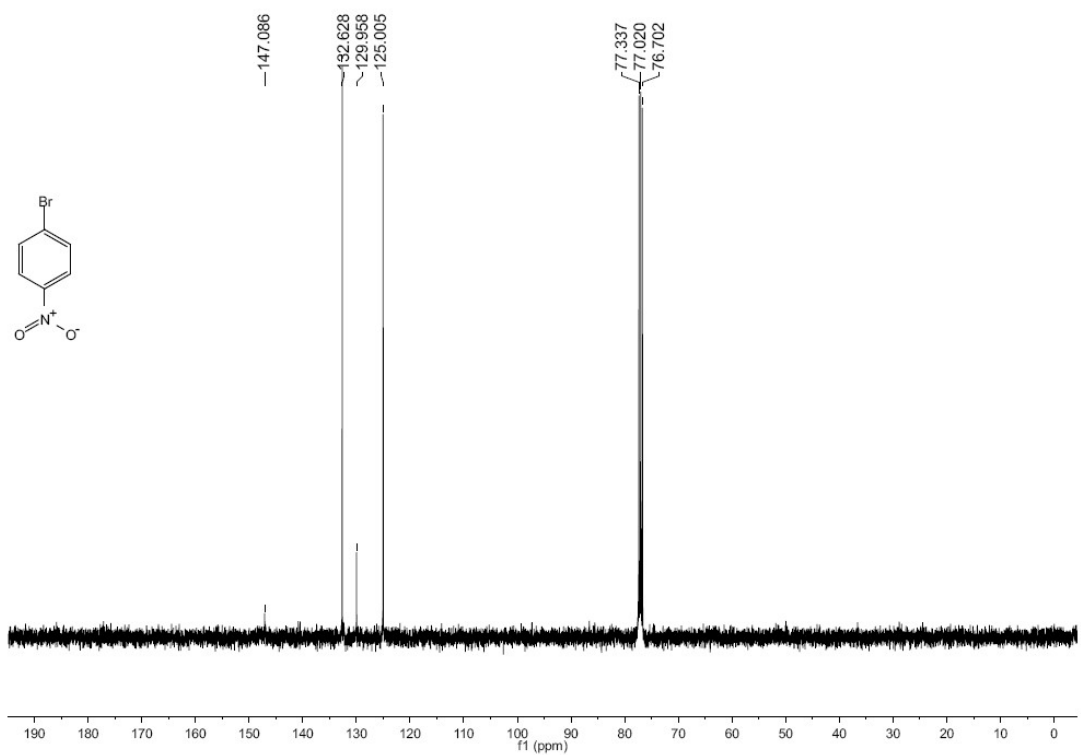

$^1\text{H}$  NMR and  $^{13}\text{C}$  NMR spectra of compounds **2i** (in  $\text{CDCl}_3$ )

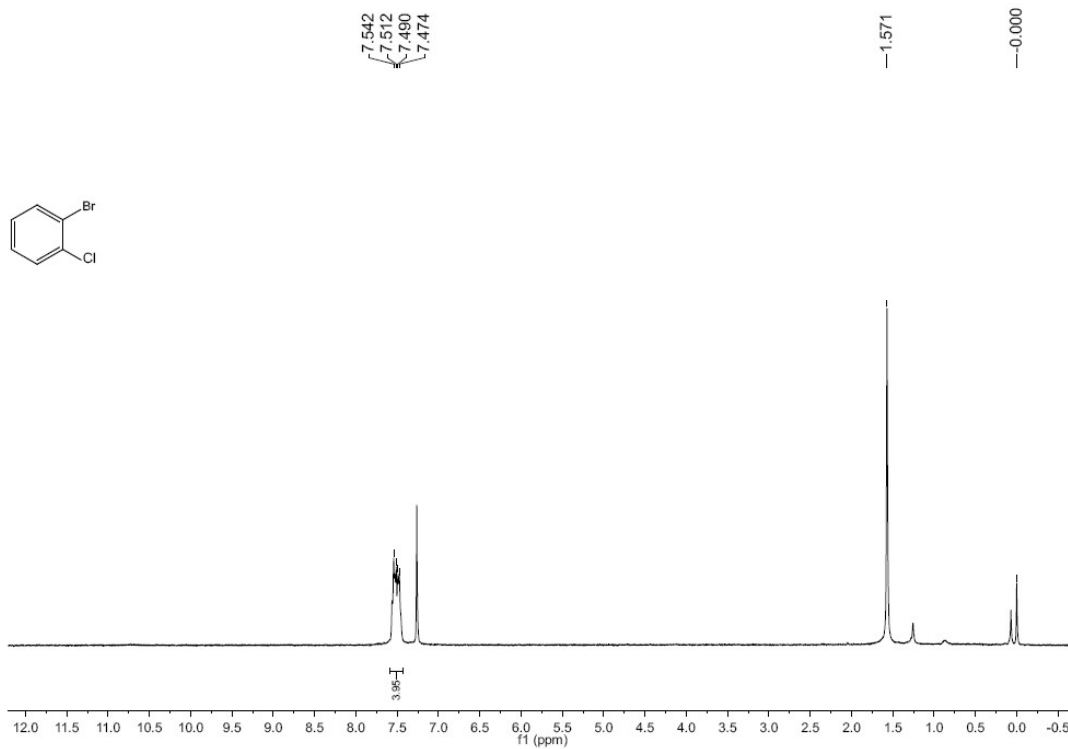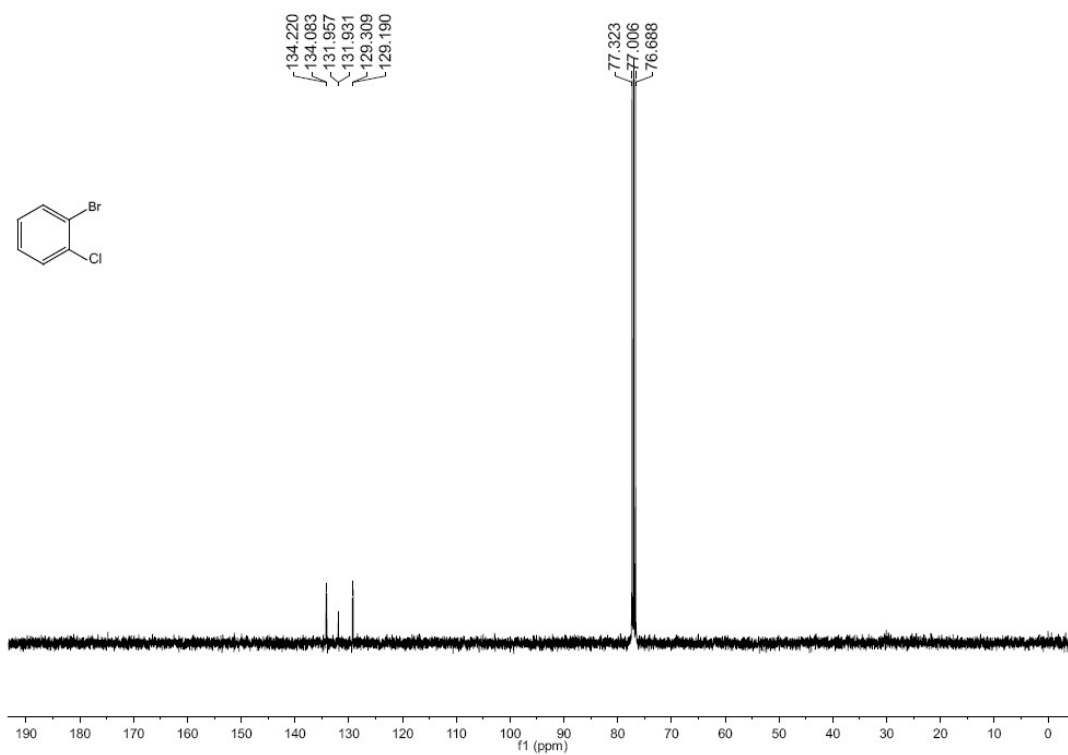

$^1\text{H}$  NMR and  $^{13}\text{C}$  NMR spectra of compounds **2j** (in  $\text{CDCl}_3$ )

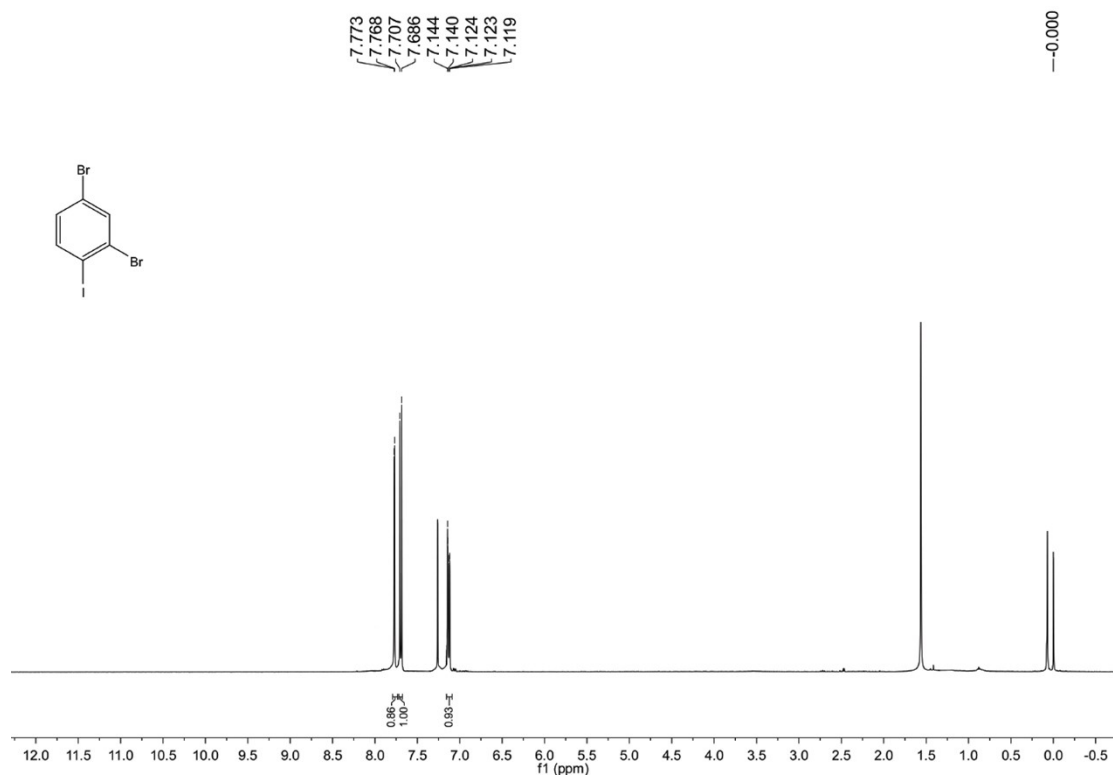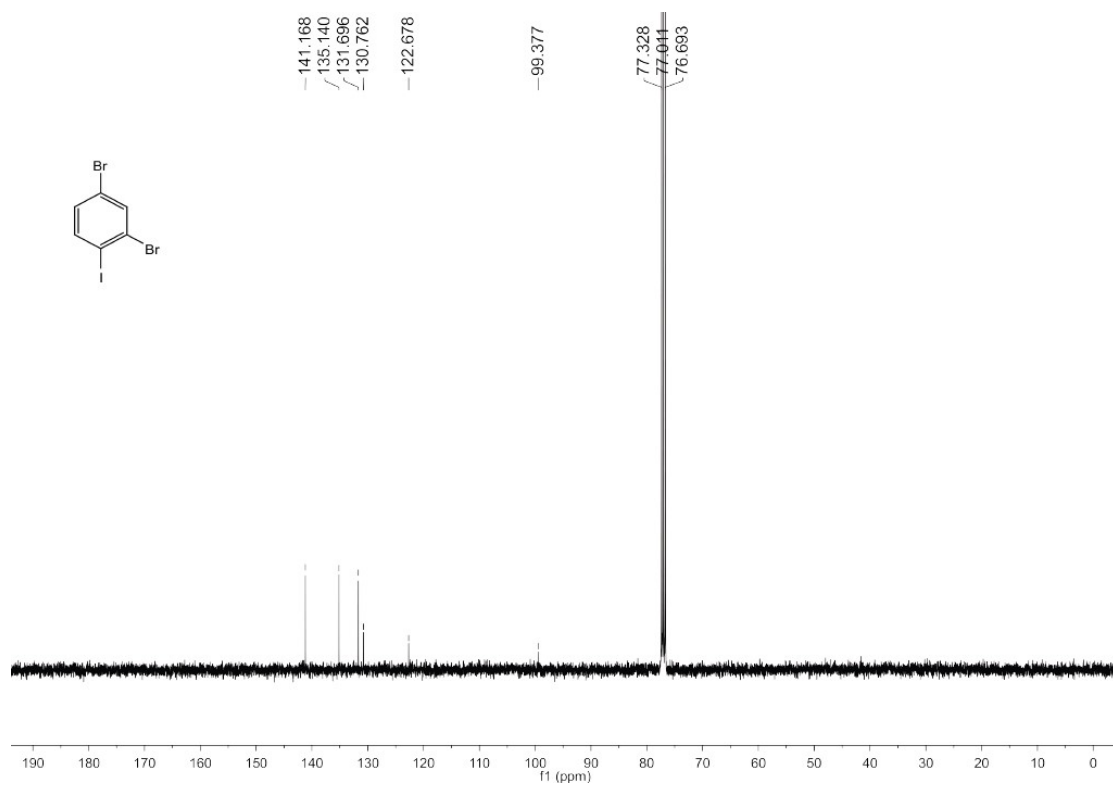

$^1\text{H}$  NMR and  $^{13}\text{C}$  NMR spectra of compounds **2k** (in  $\text{CDCl}_3$ )

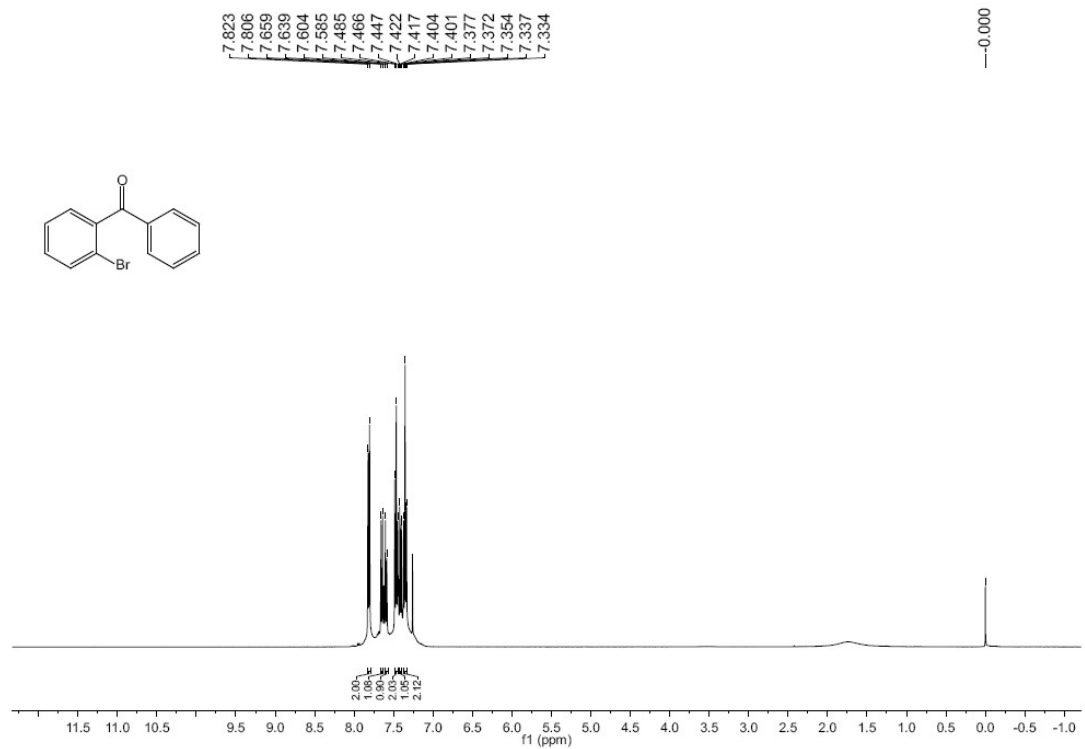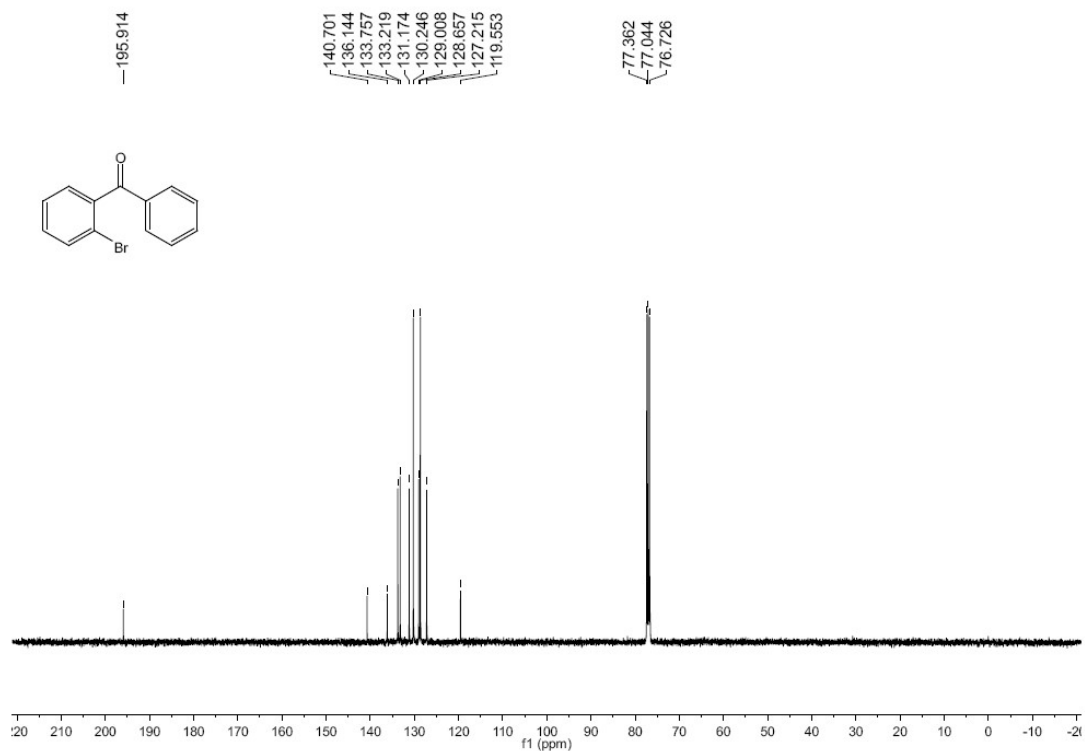

$^1\text{H}$  NMR and  $^{13}\text{C}$  NMR spectra of compounds **21** (in  $\text{CDCl}_3$ )

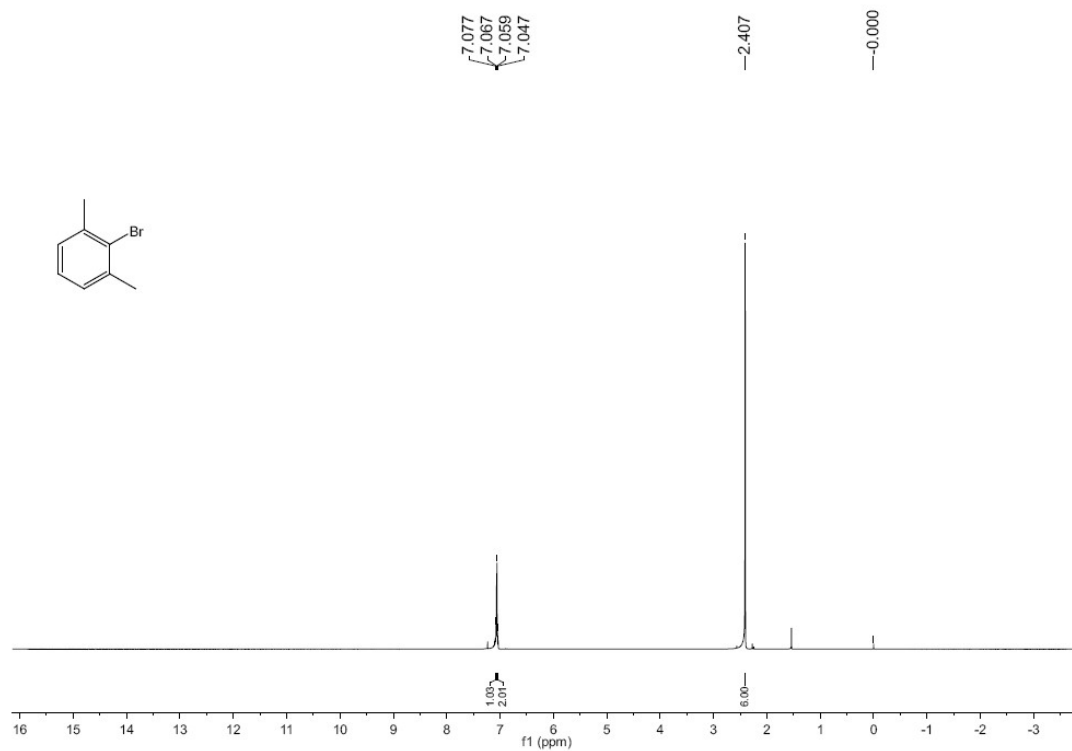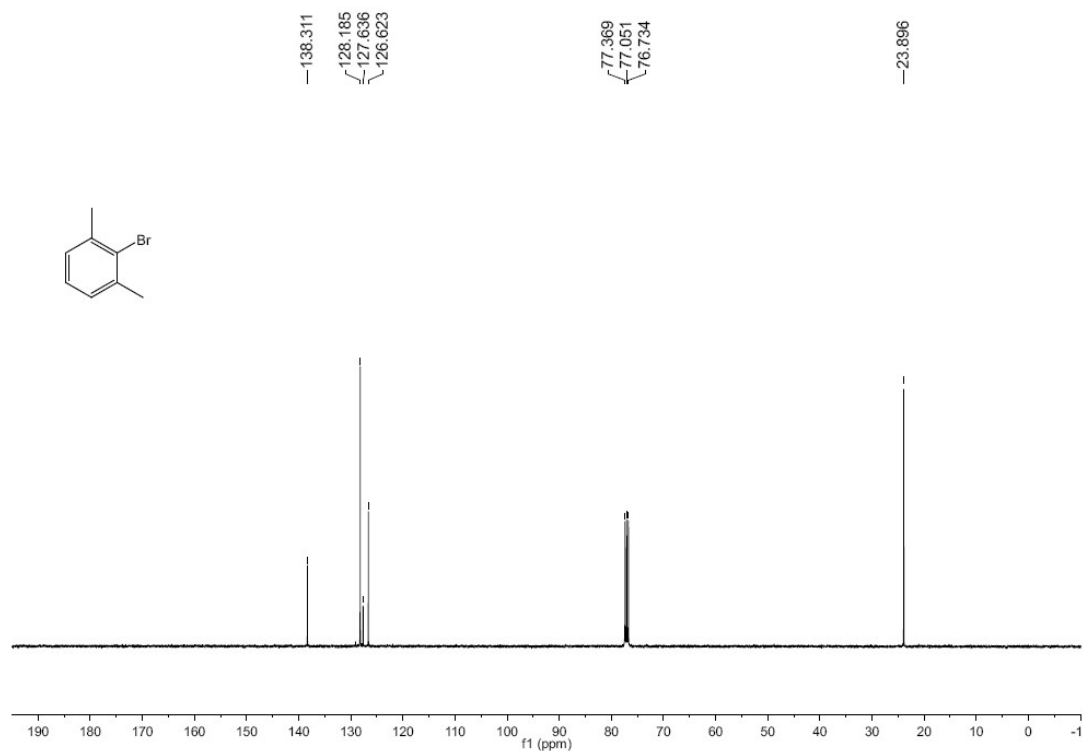

$^1\text{H}$  NMR and  $^{13}\text{C}$  NMR spectra of compounds **2m** (in  $\text{CDCl}_3$ )

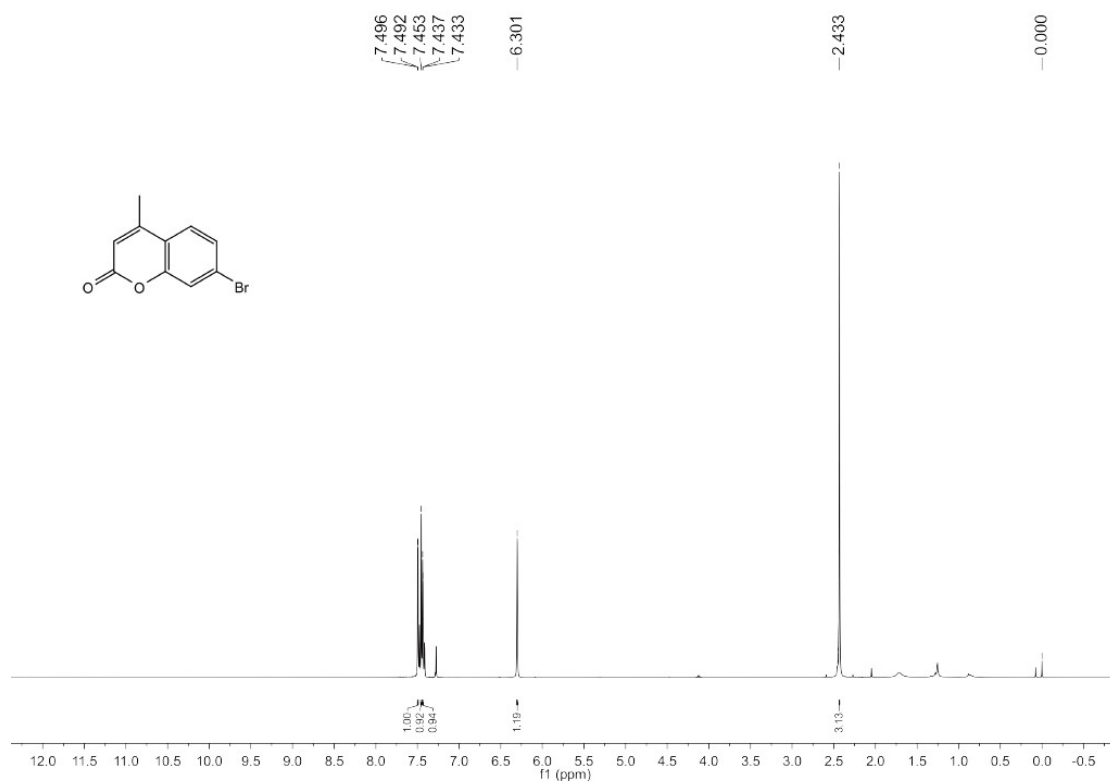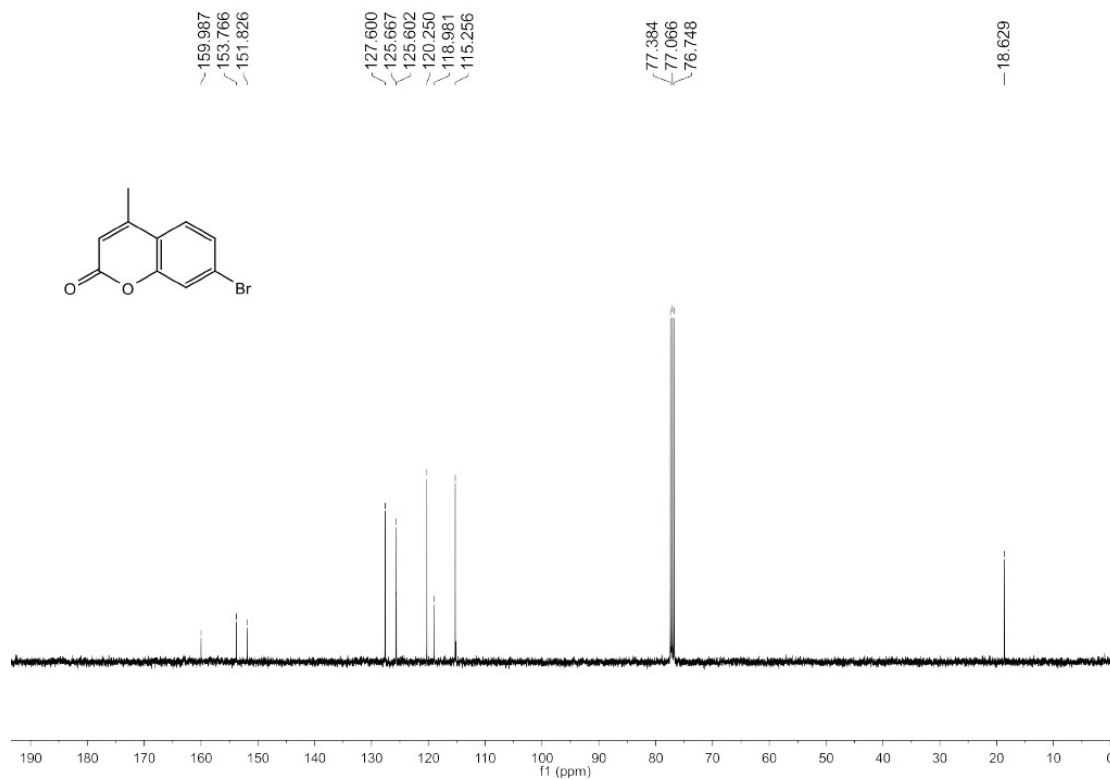

<sup>1</sup>H NMR and <sup>13</sup>C NMR spectra of compounds **2n** (in CDCl<sub>3</sub>)

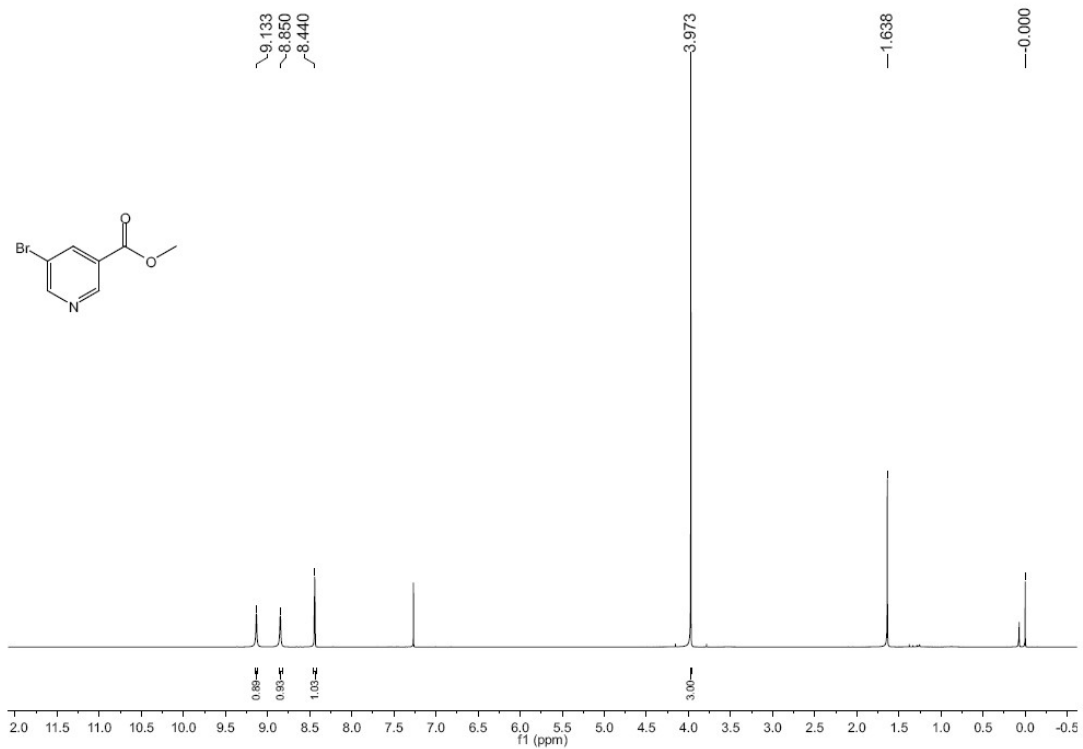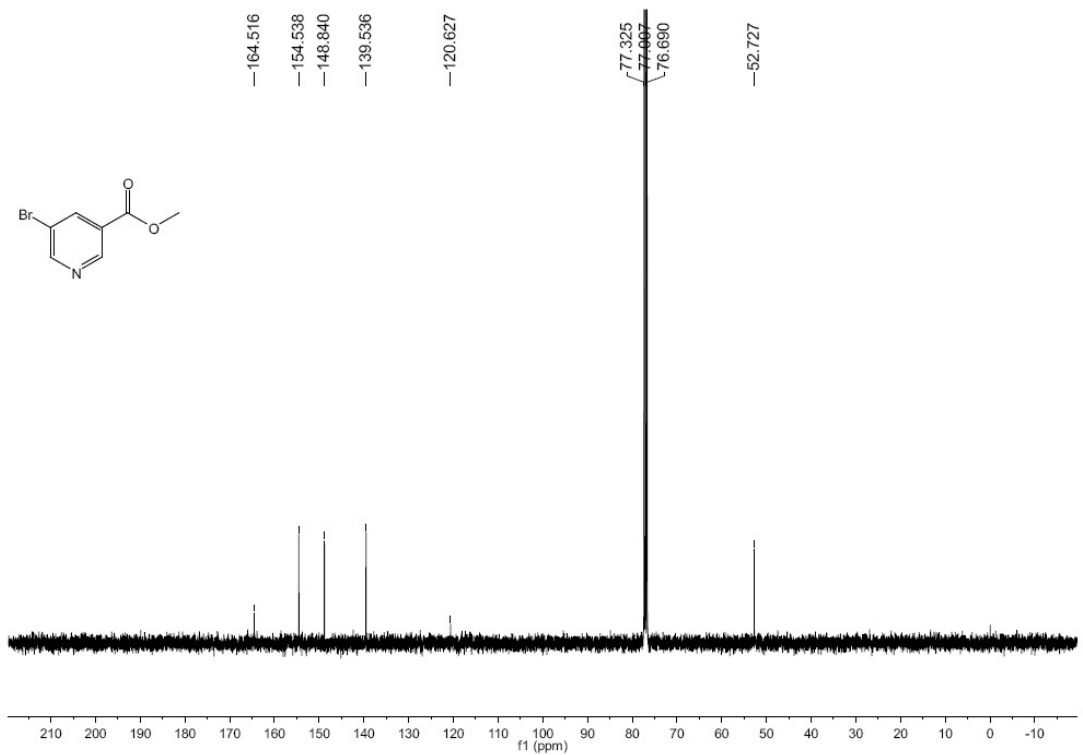

$^1\text{H}$  NMR and  $^{13}\text{C}$  NMR spectra of compounds **2o** (in  $\text{CDCl}_3$ )



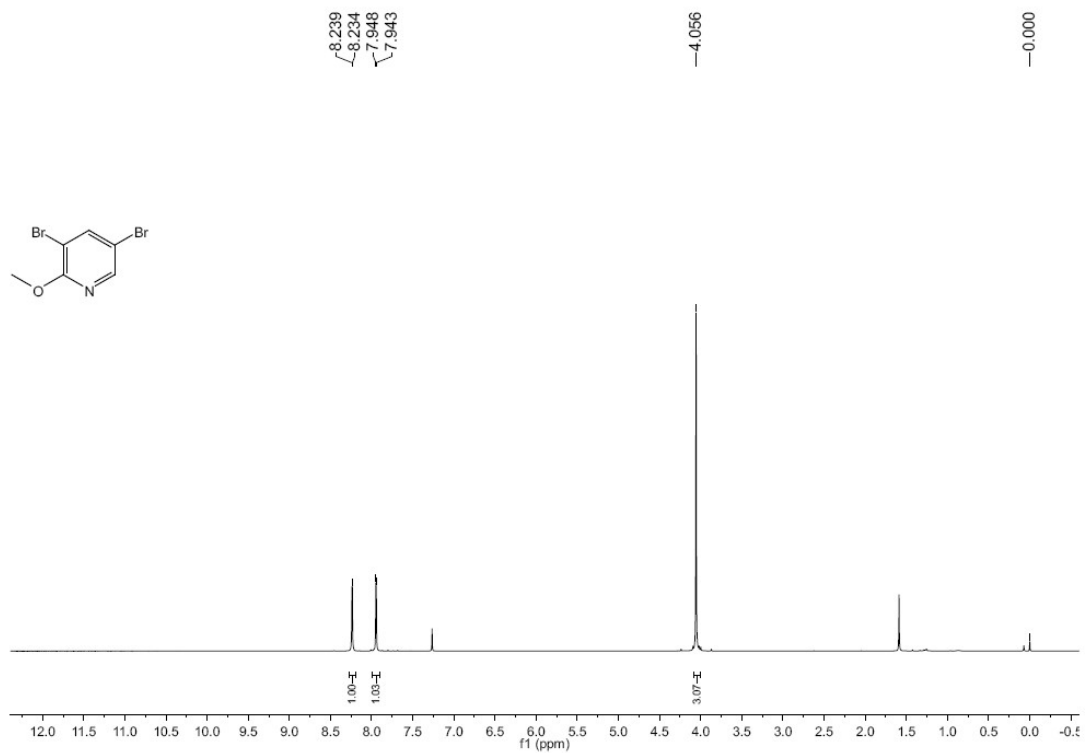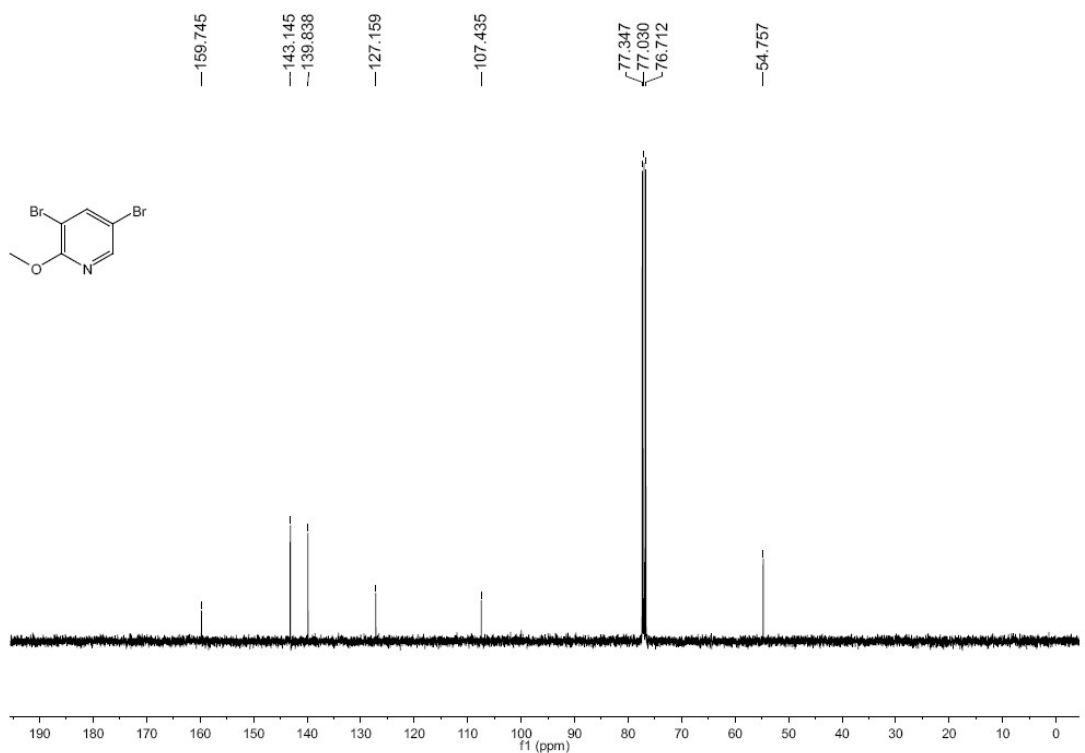

$^1\text{H}$  NMR and  $^{13}\text{C}$  NMR spectra of compounds **2p** (in  $\text{CDCl}_3$ )

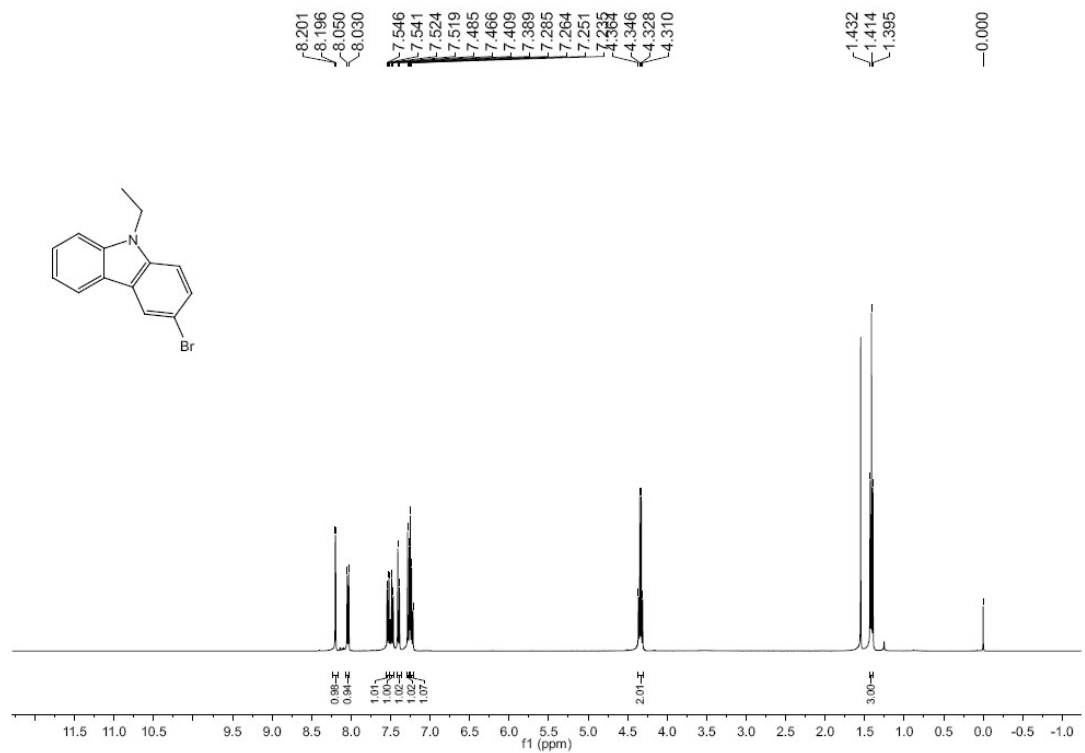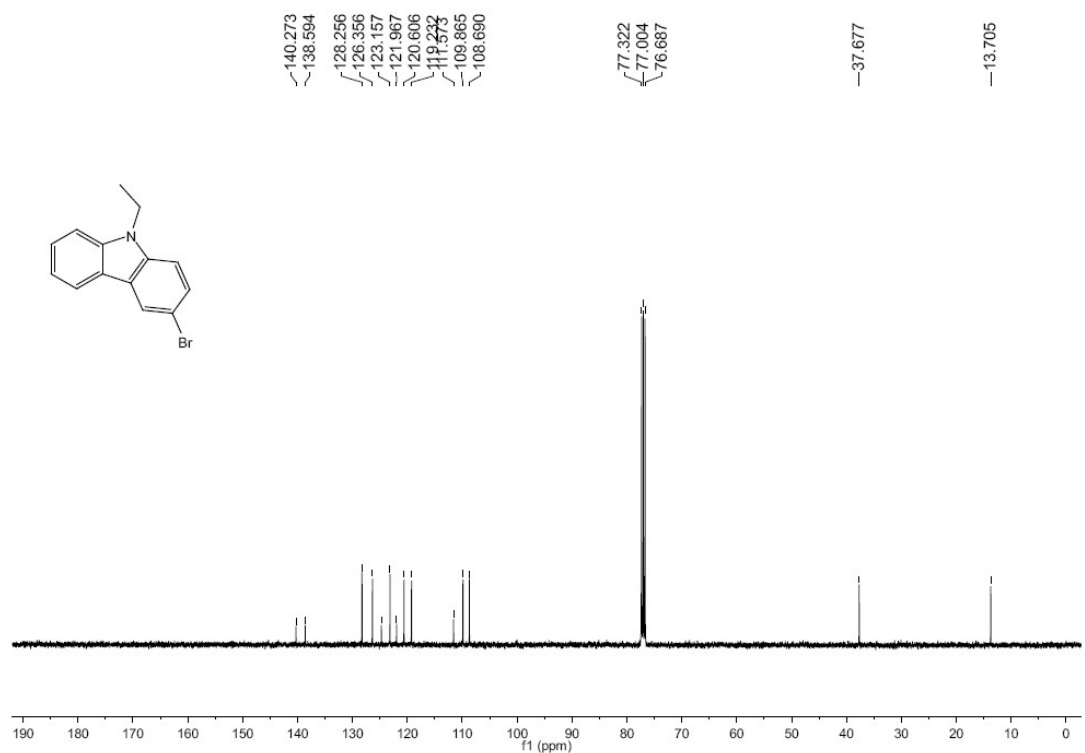

<sup>1</sup>H NMR and <sup>13</sup>C NMR spectra of compounds **2q** (in CDCl<sub>3</sub>)

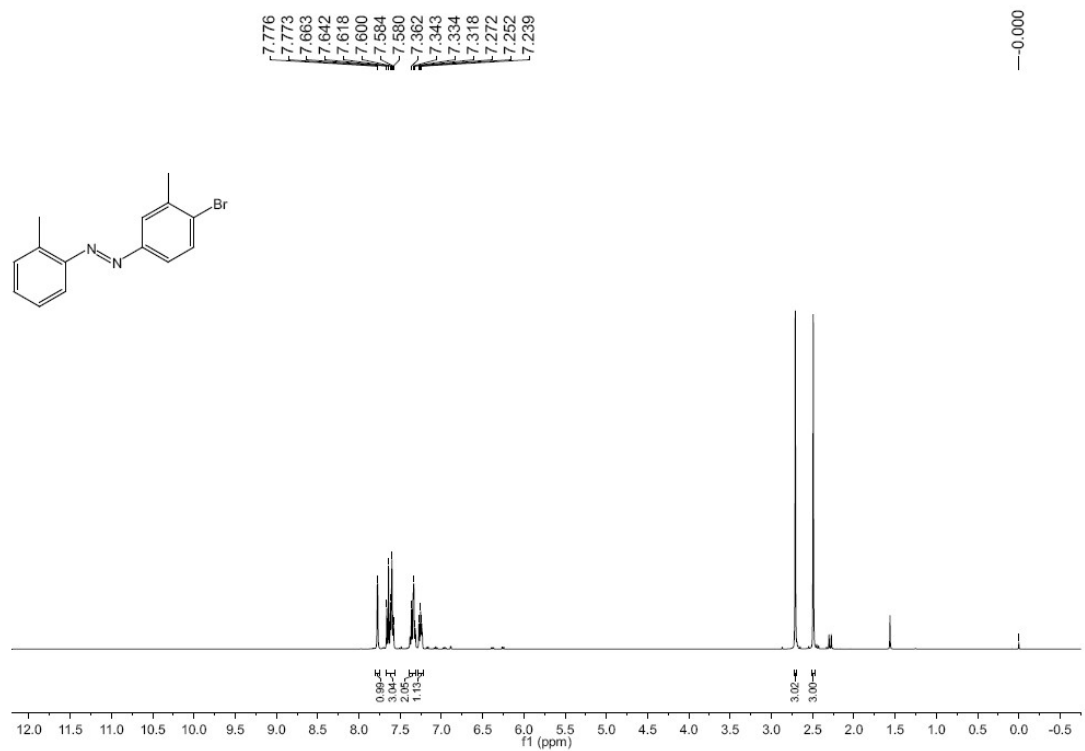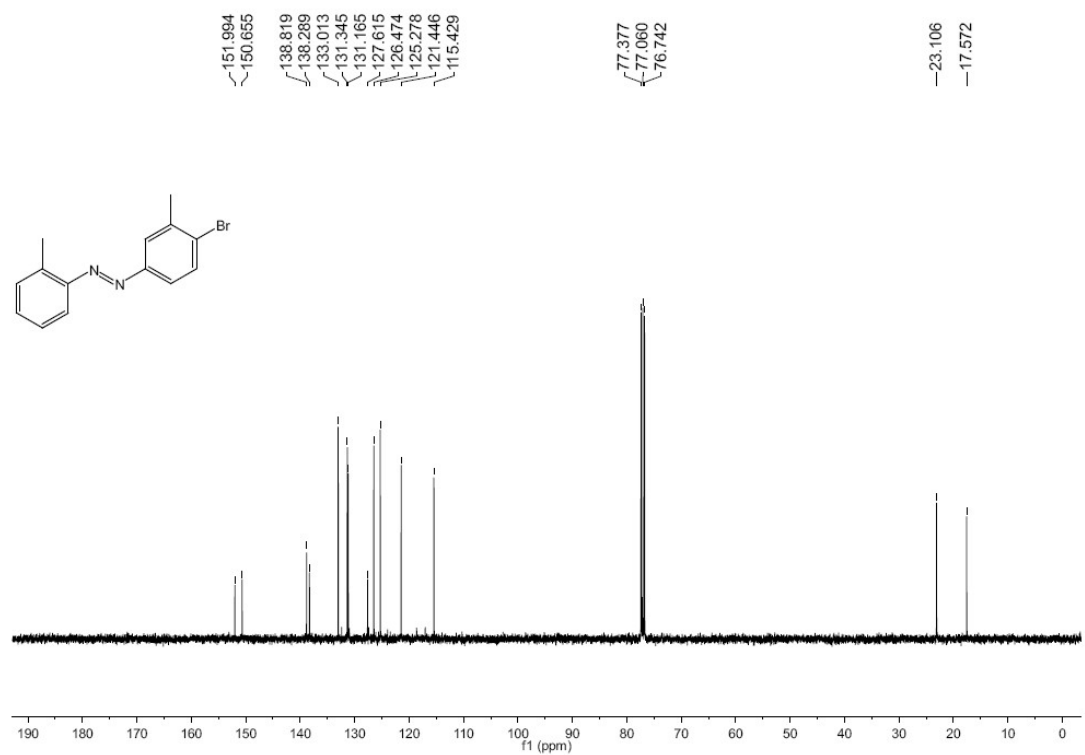

$^1\text{H}$  NMR and  $^{13}\text{C}$  NMR spectra of compounds **2r** (in  $\text{CDCl}_3$ )

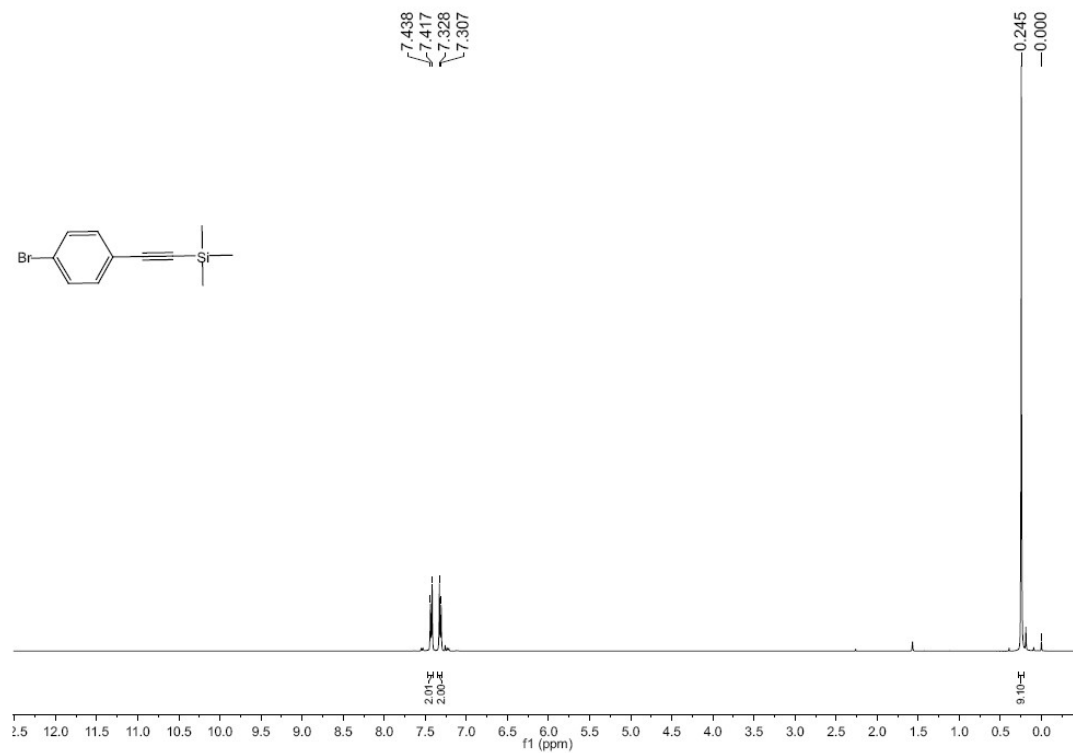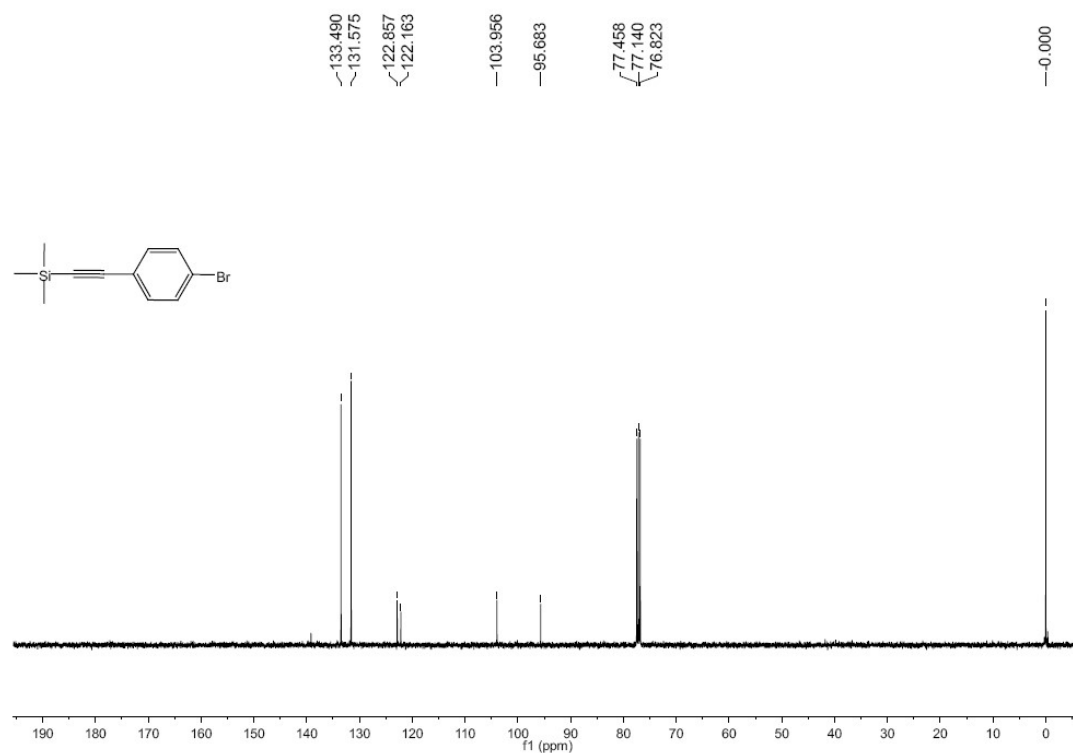

<sup>1</sup>H NMR and <sup>13</sup>C NMR spectra of compounds **2s** (in CDCl<sub>3</sub>)

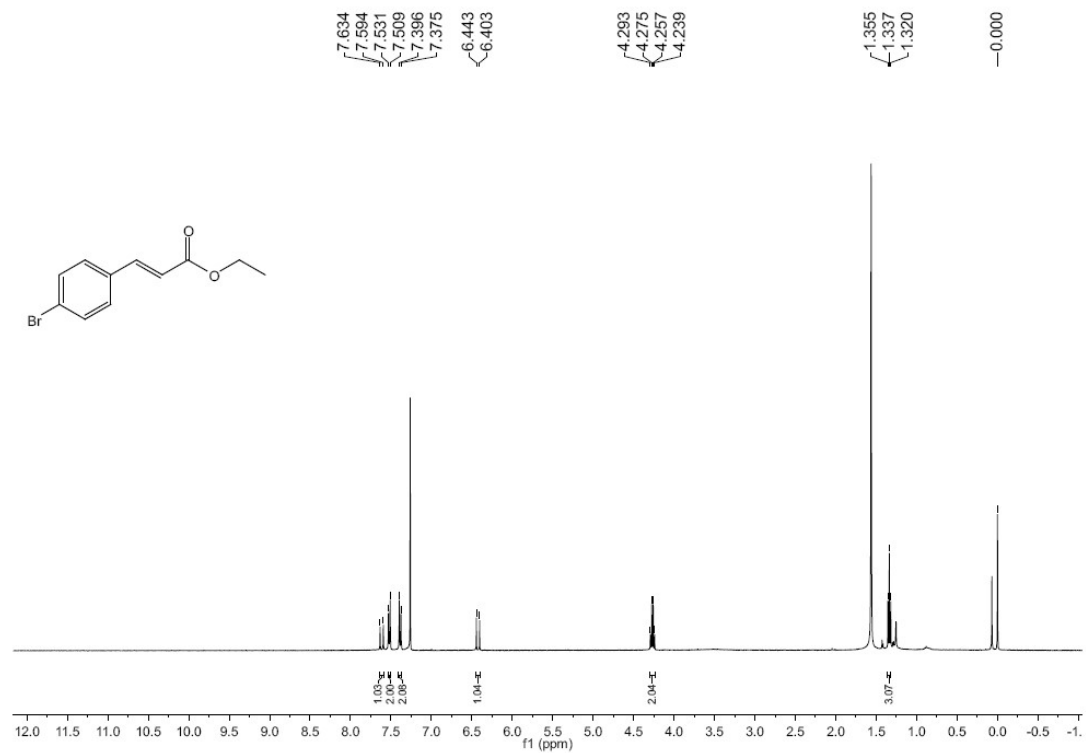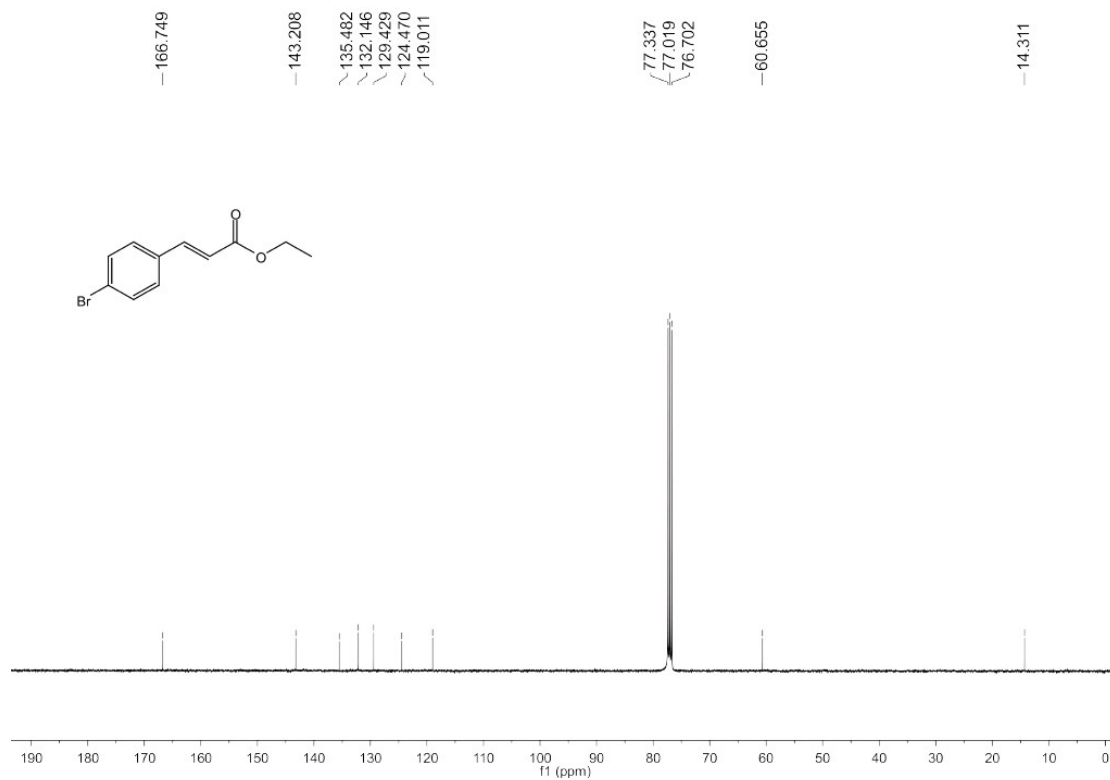

<sup>1</sup>H NMR and <sup>13</sup>C NMR spectra of compounds **2t** (in CDCl<sub>3</sub>)

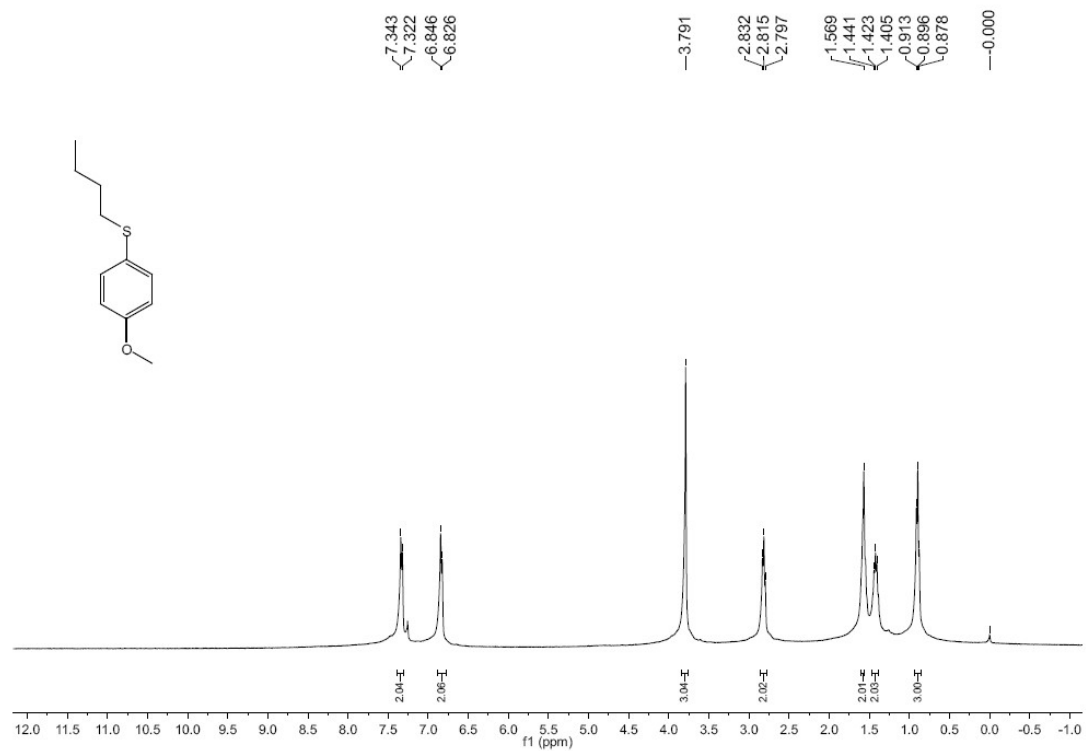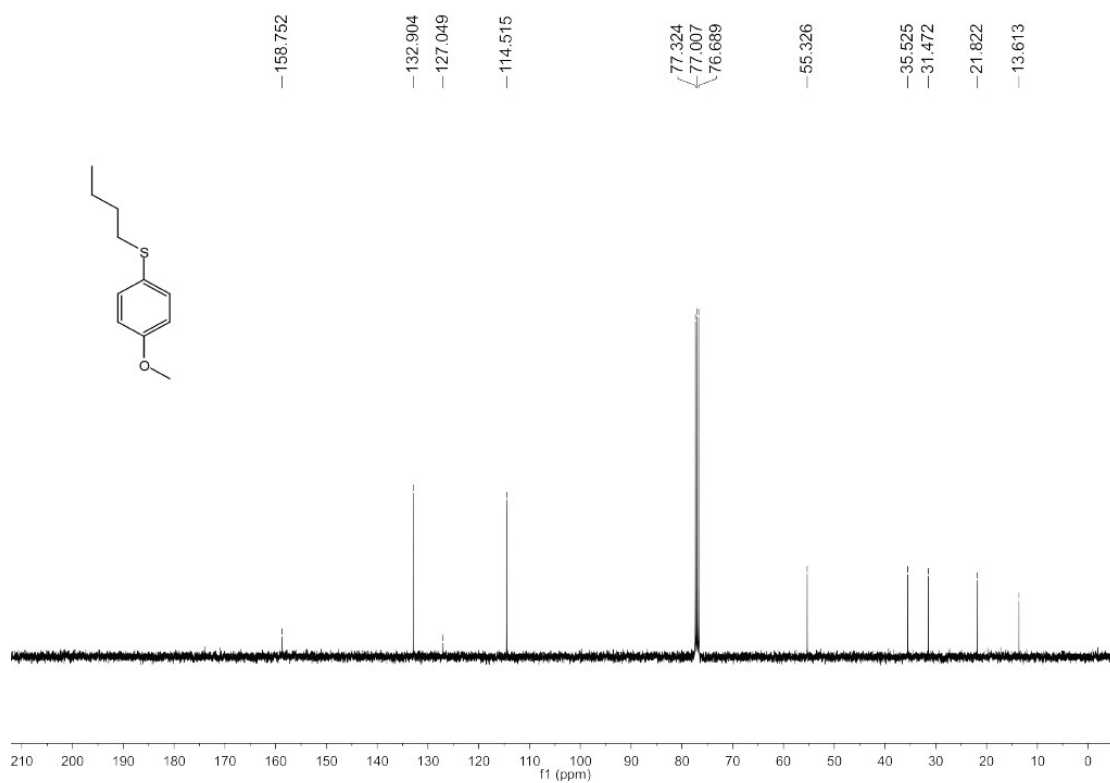

<sup>1</sup>H NMR and <sup>13</sup>C NMR spectra of compounds **4a** (in CDCl<sub>3</sub>)

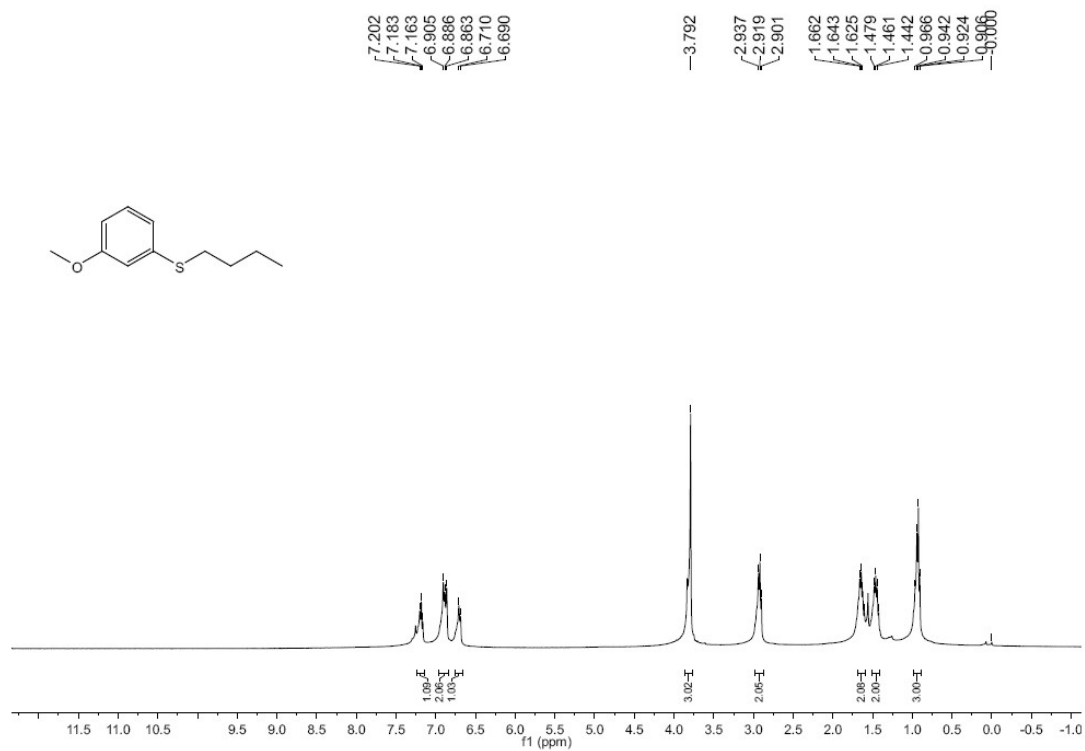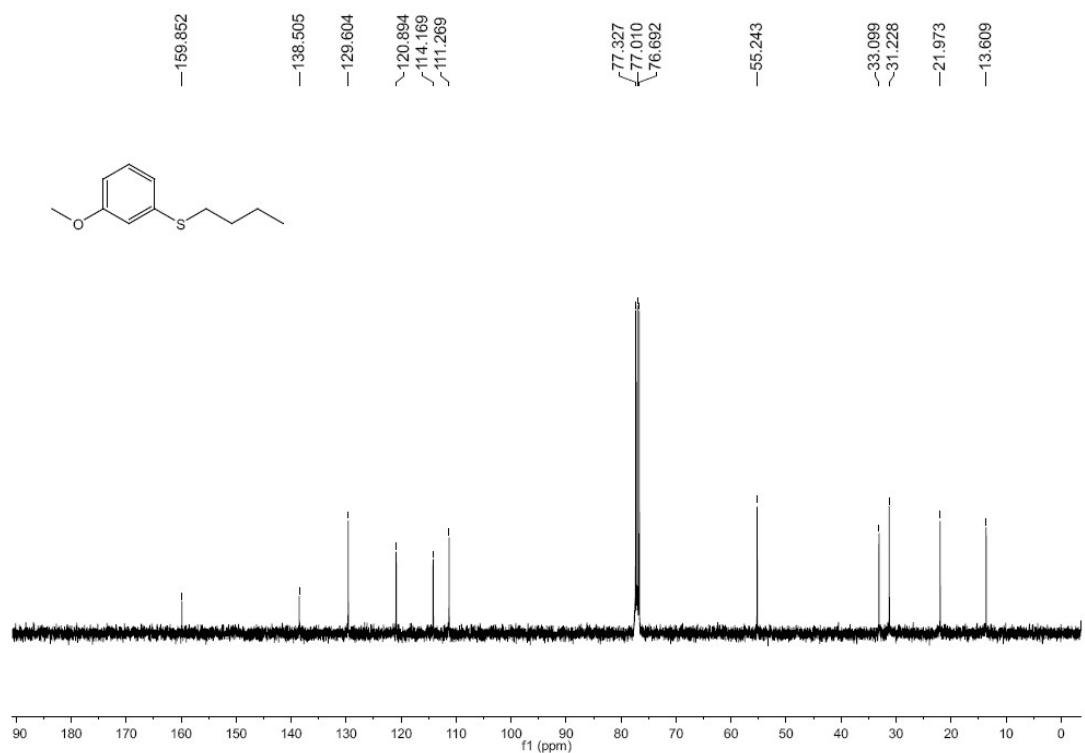

$^1\text{H}$  NMR and  $^{13}\text{C}$  NMR spectra of compounds **4b** (in  $\text{CDCl}_3$ )

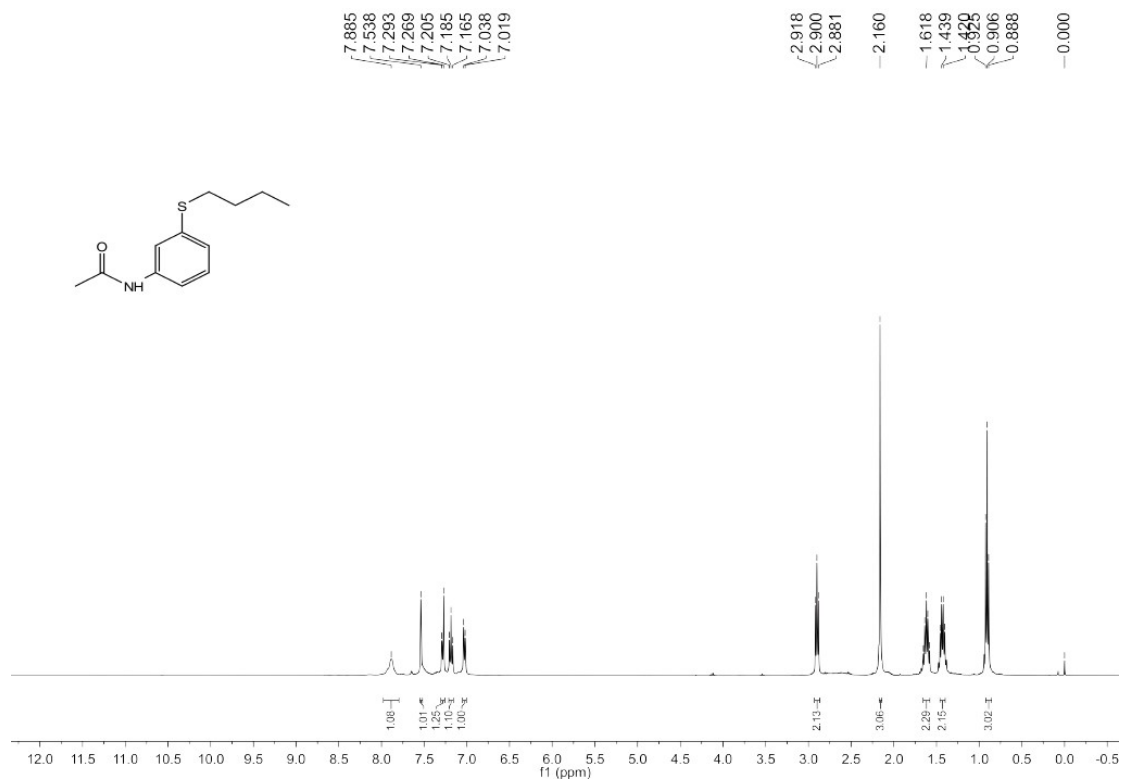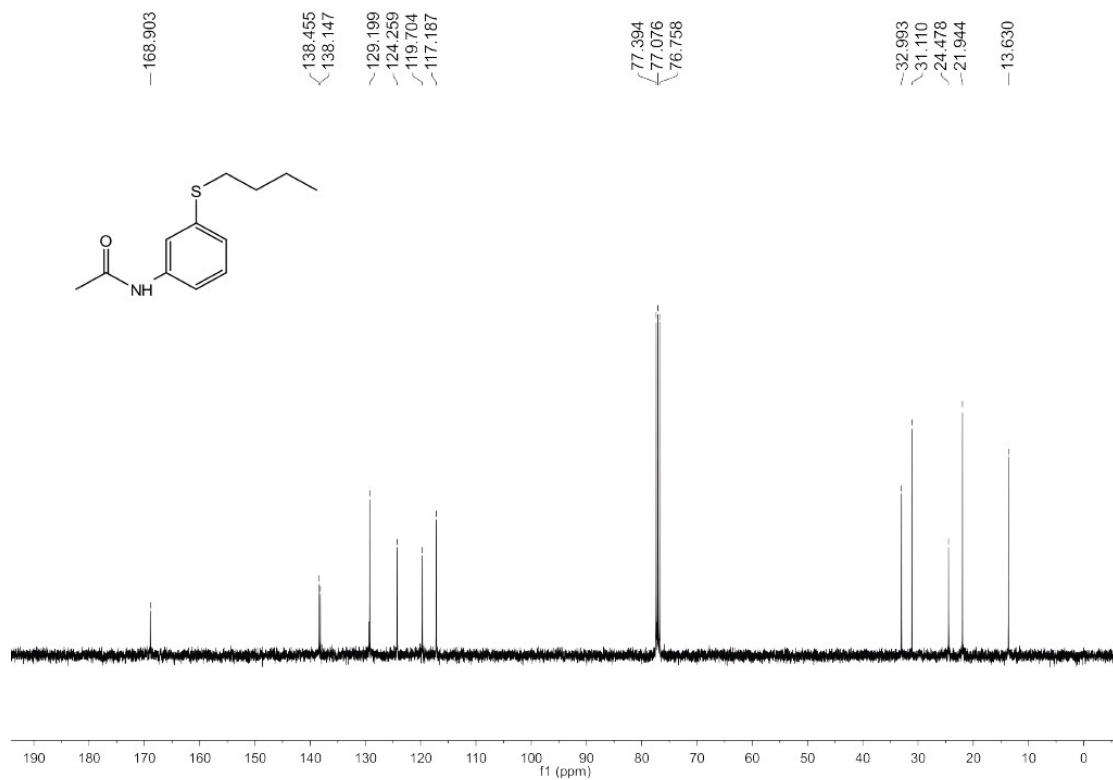

<sup>1</sup>H NMR and <sup>13</sup>C NMR spectra of compounds **4c** (in CDCl<sub>3</sub>)



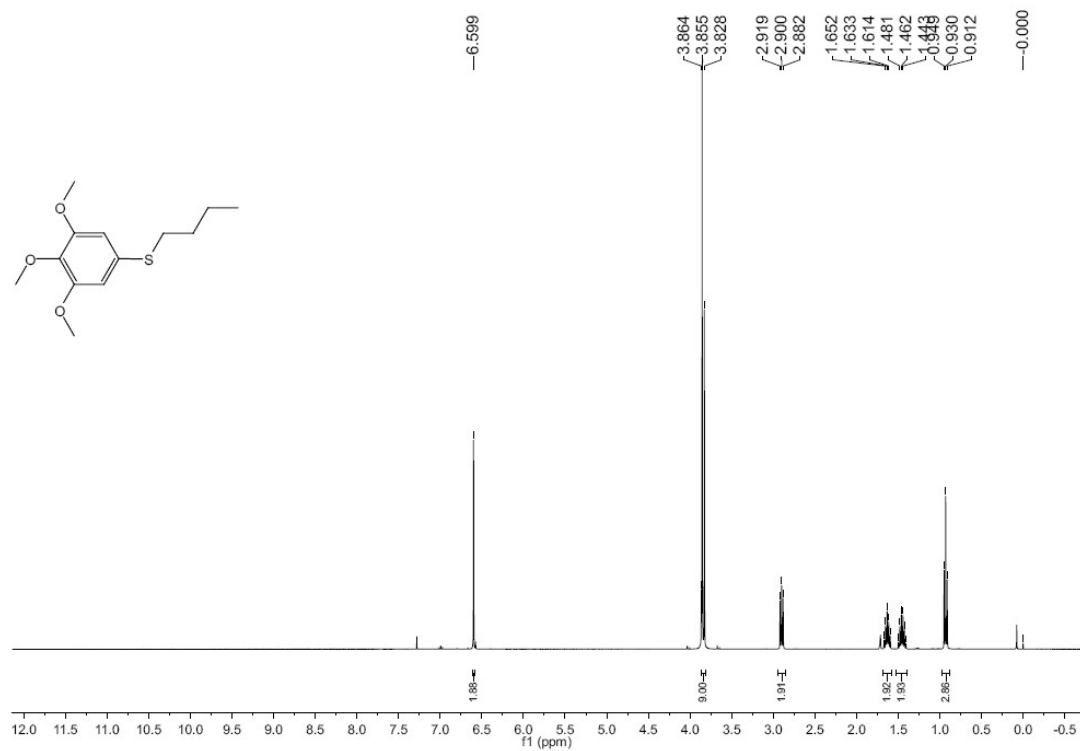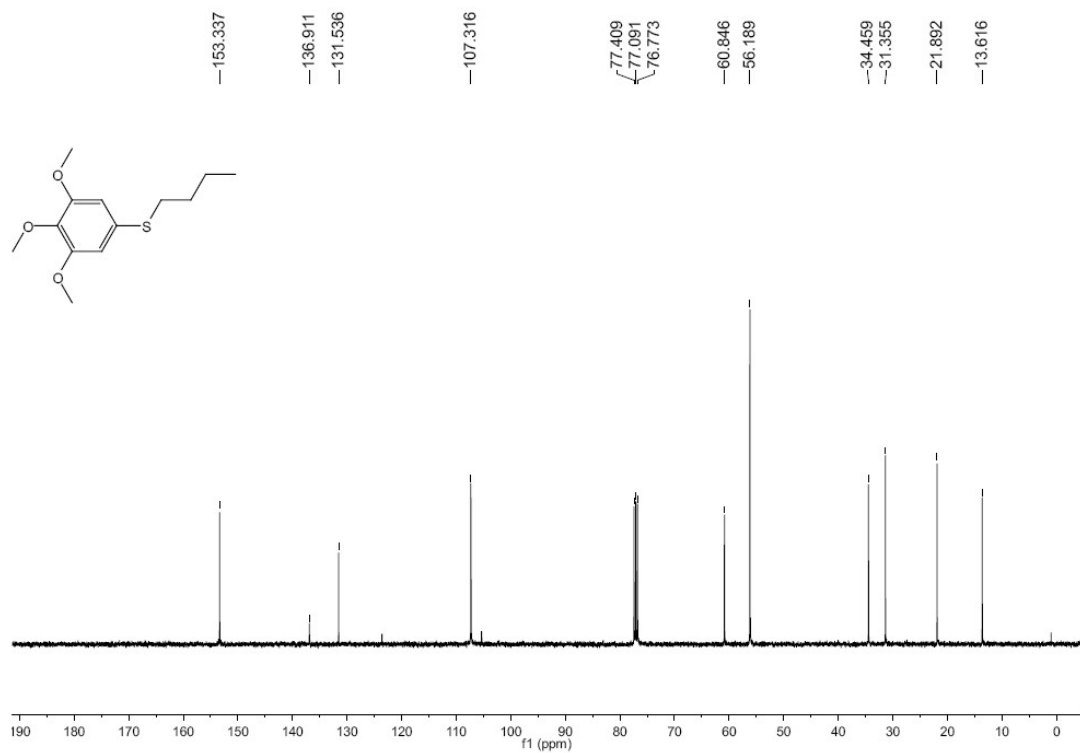

<sup>1</sup>H NMR and <sup>13</sup>C NMR spectra of compounds **4d** (in CDCl<sub>3</sub>)

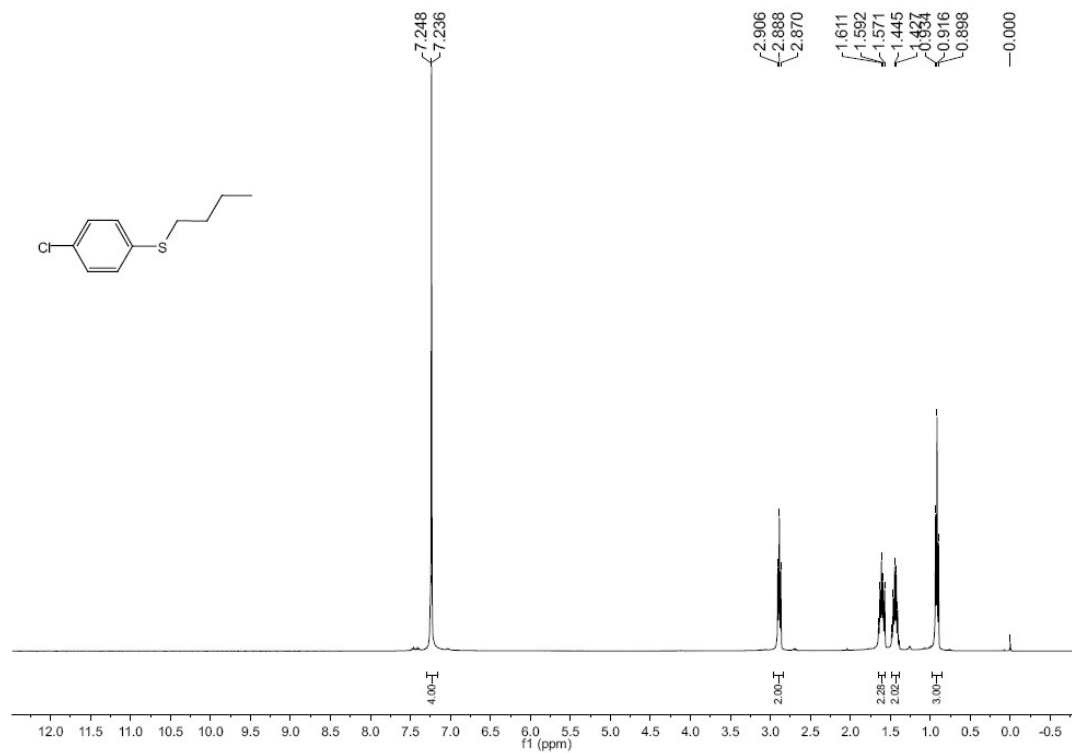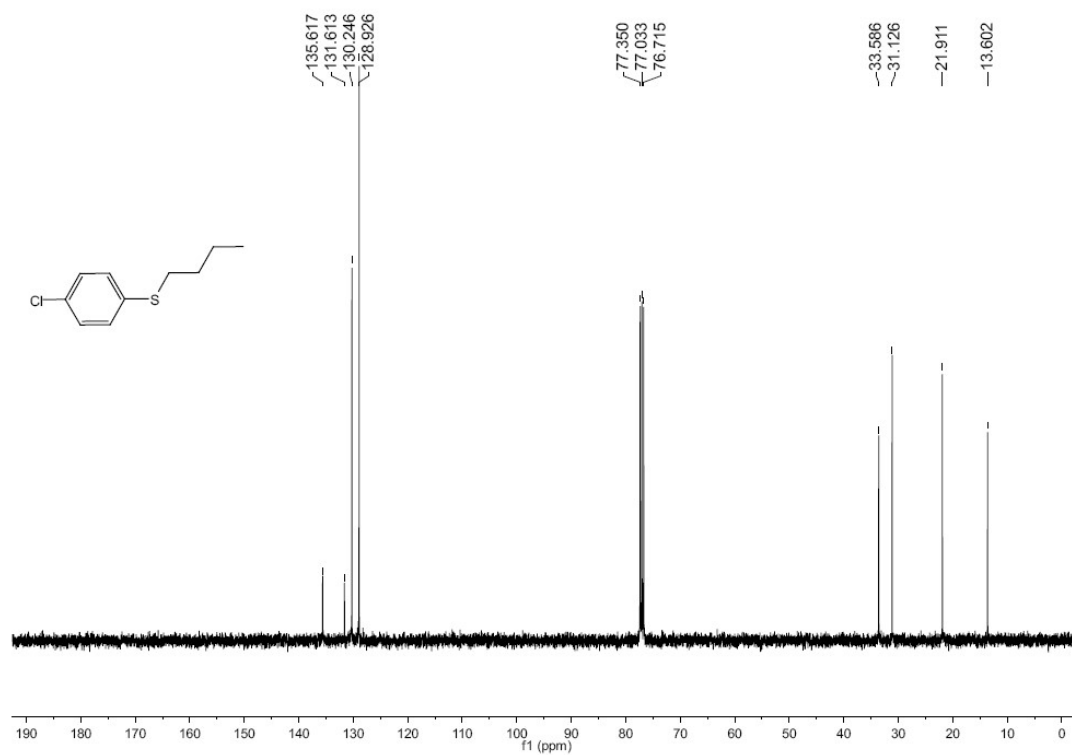

$^1\text{H NMR}$  and  $^{13}\text{C NMR}$  spectra of compounds **4e** (in  $\text{CDCl}_3$ )

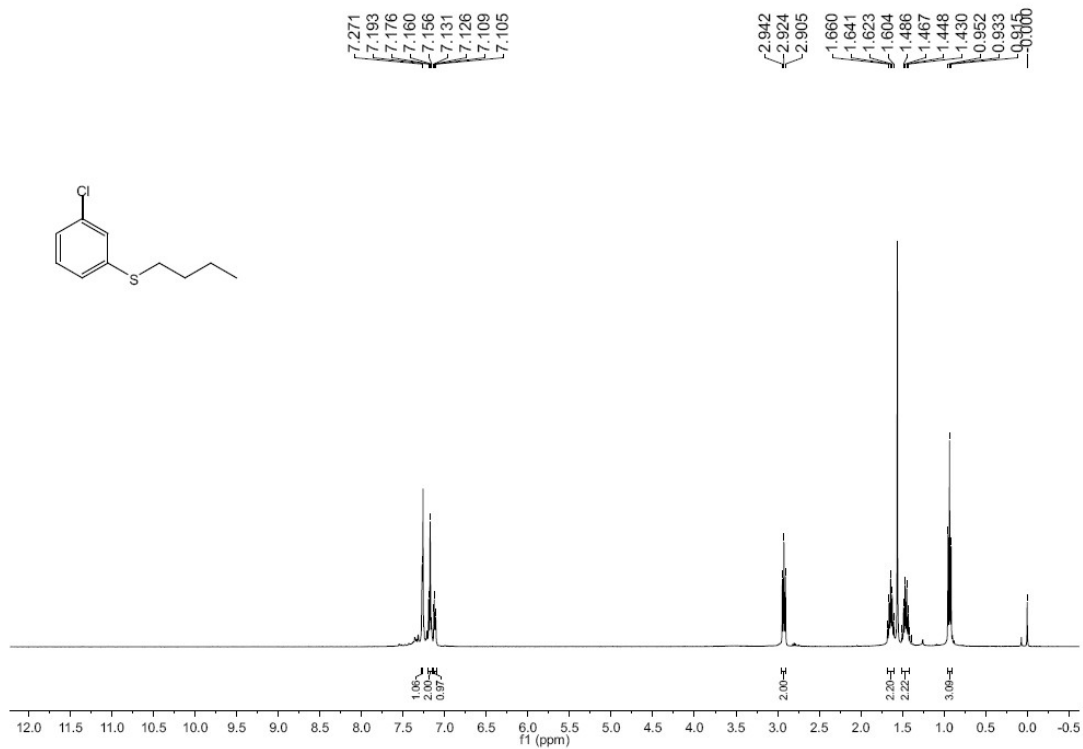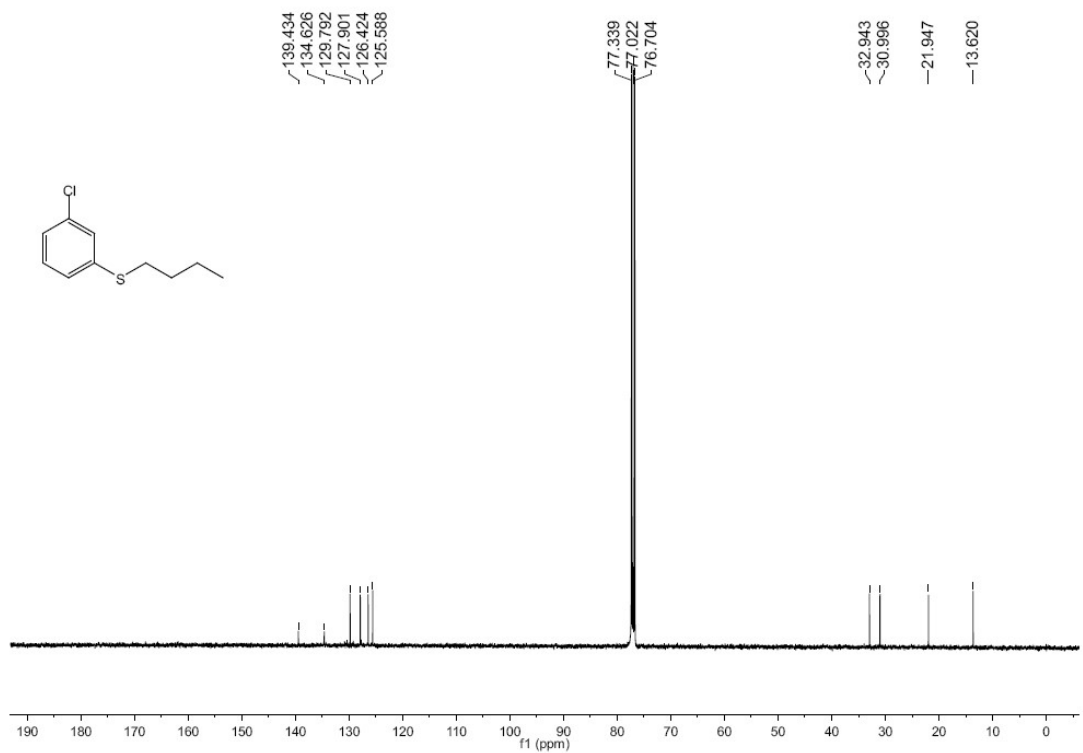

<sup>1</sup>H NMR and <sup>13</sup>C NMR spectra of compounds **4f** (in CDCl<sub>3</sub>)

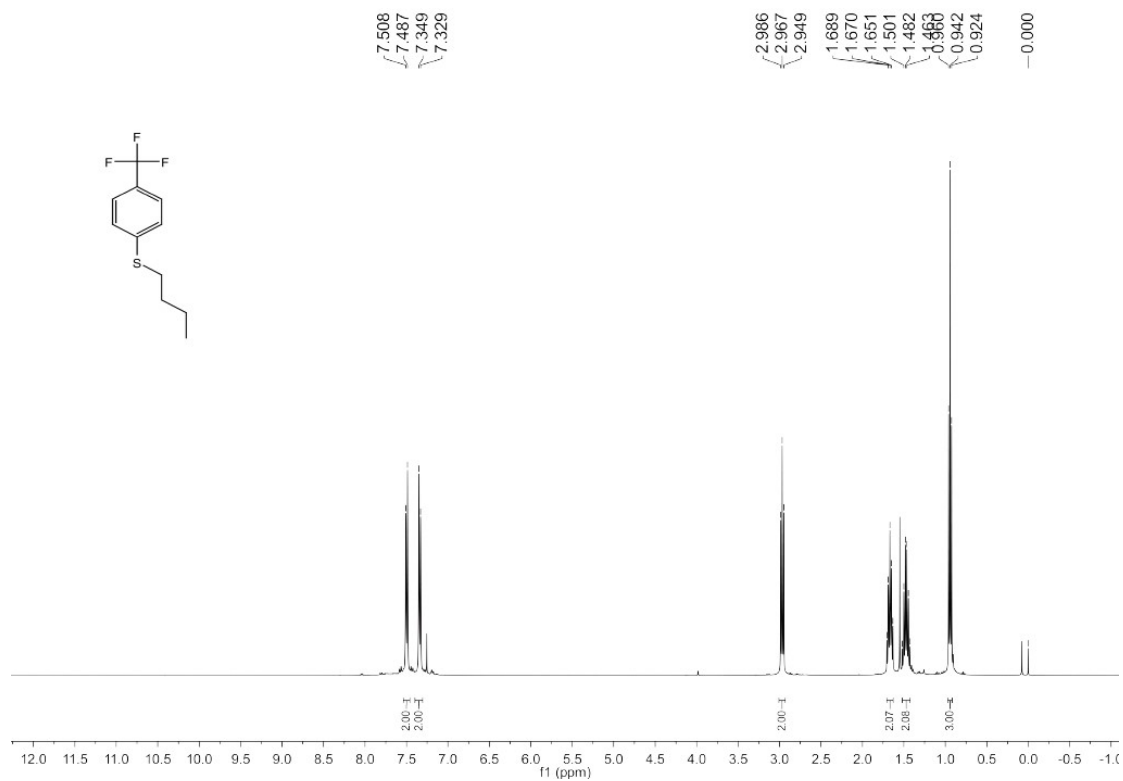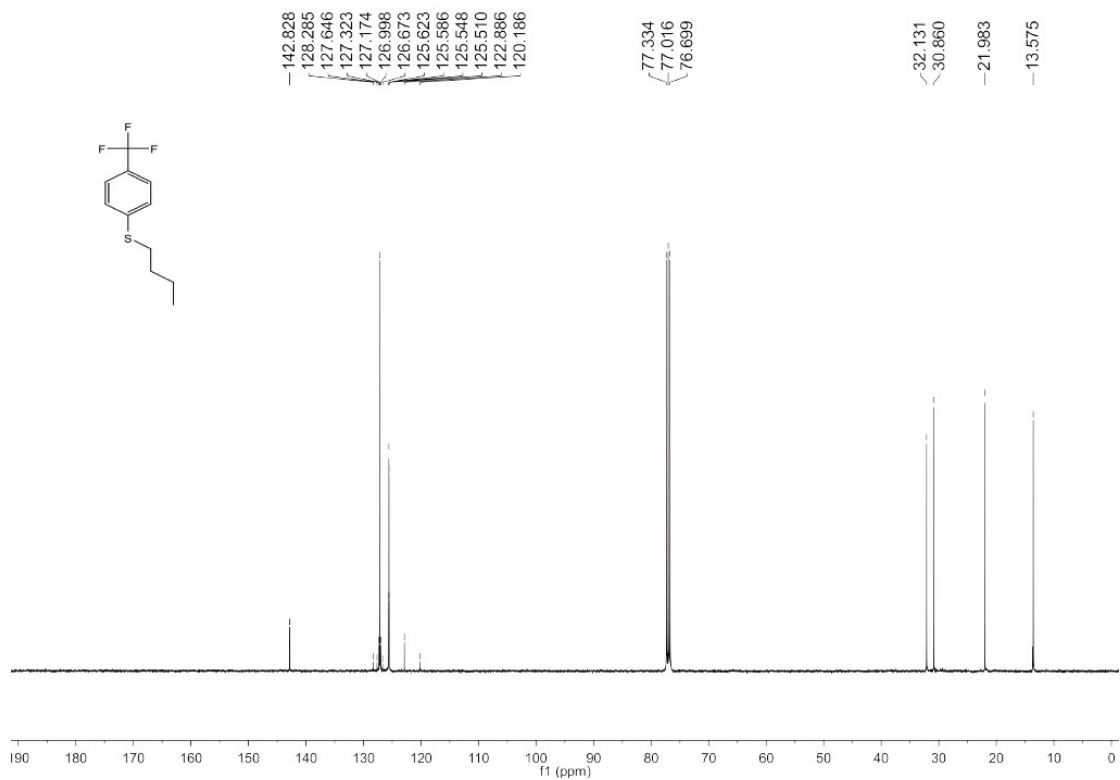

$^1\text{H}$  NMR and  $^{13}\text{C}$  NMR spectra of compounds **4g** (in  $\text{CDCl}_3$ )

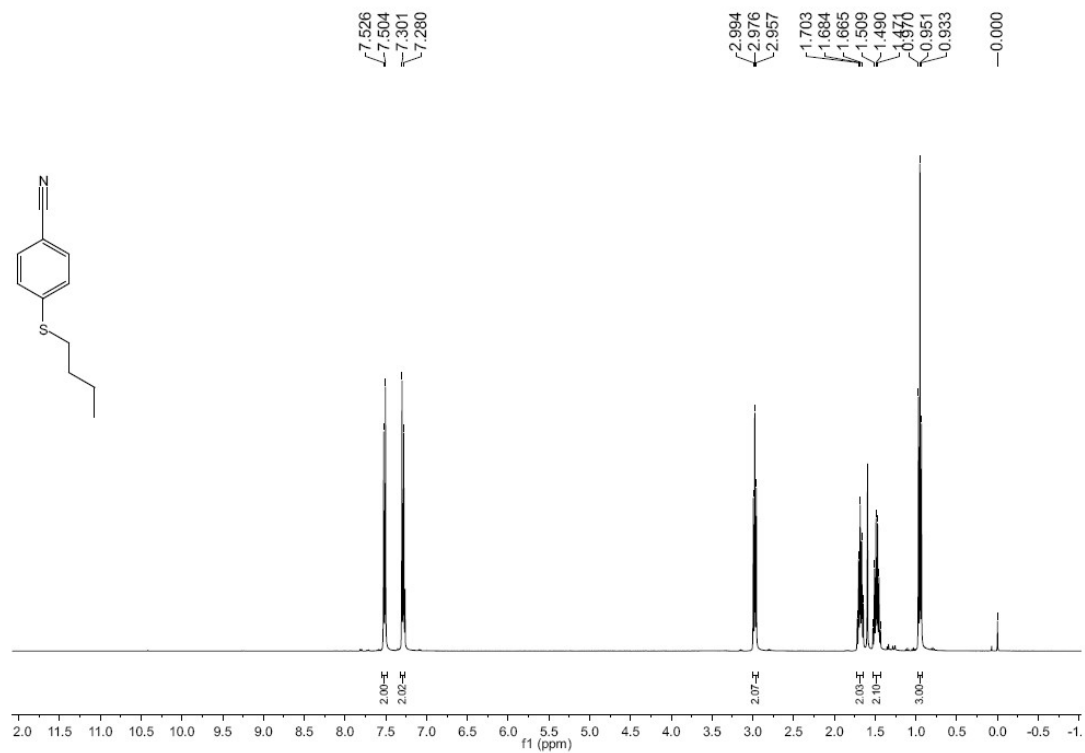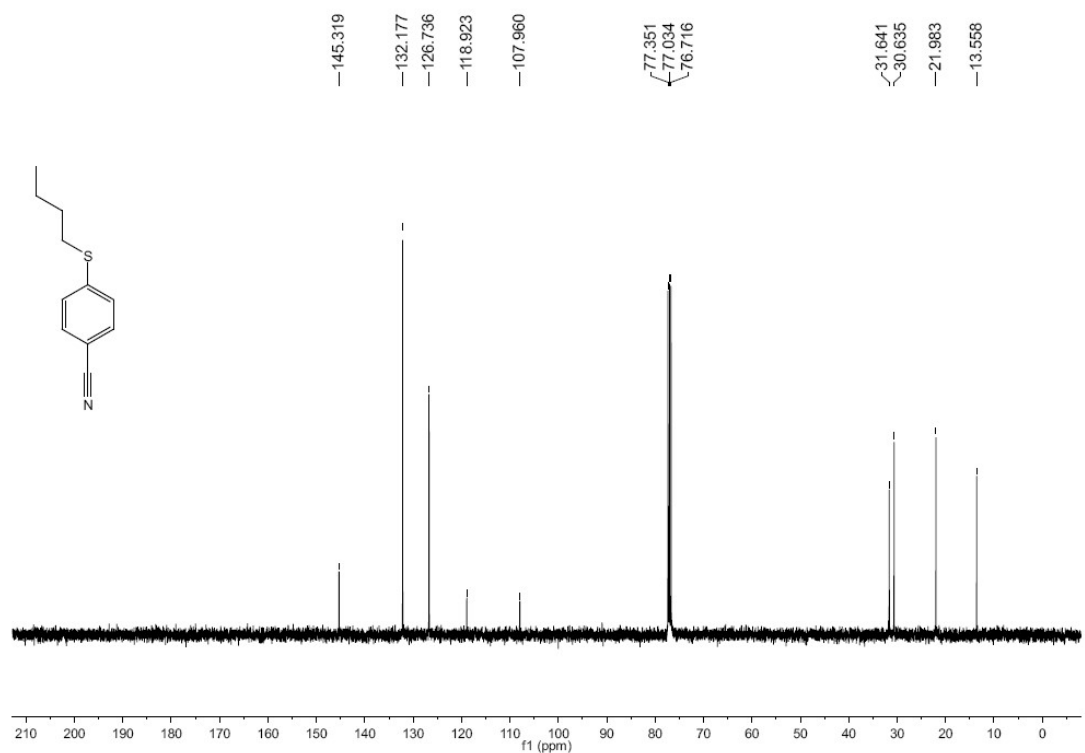

$^1\text{H}$  NMR and  $^{13}\text{C}$  NMR spectra of compounds **4h** (in  $\text{CDCl}_3$ )

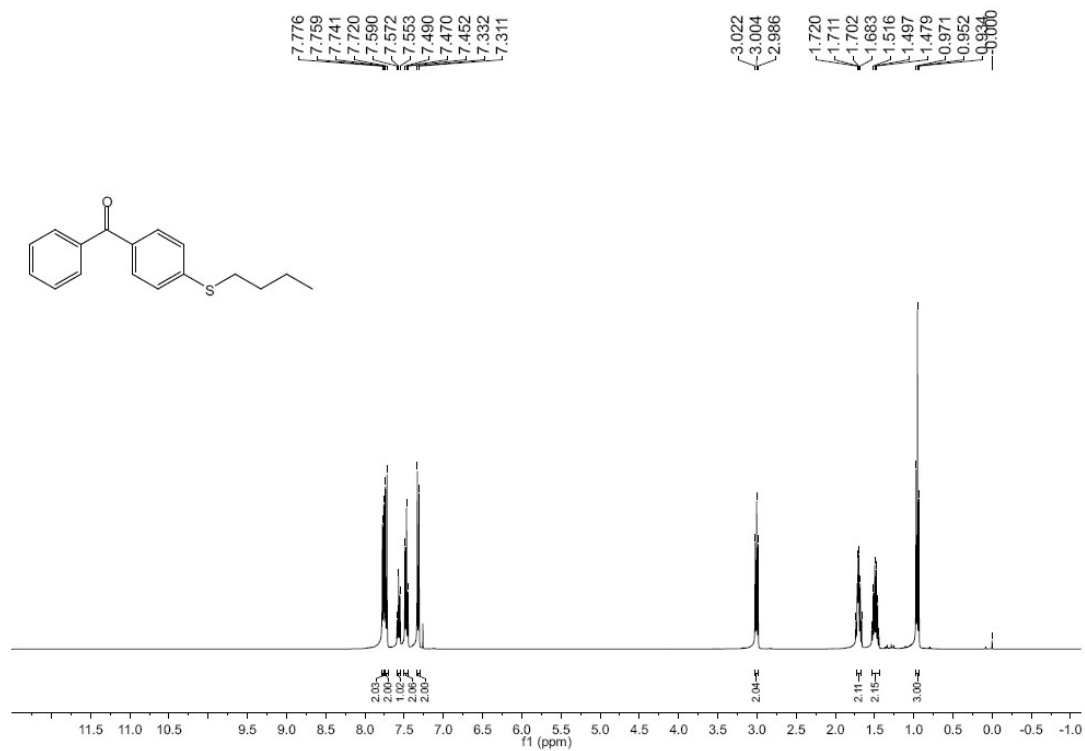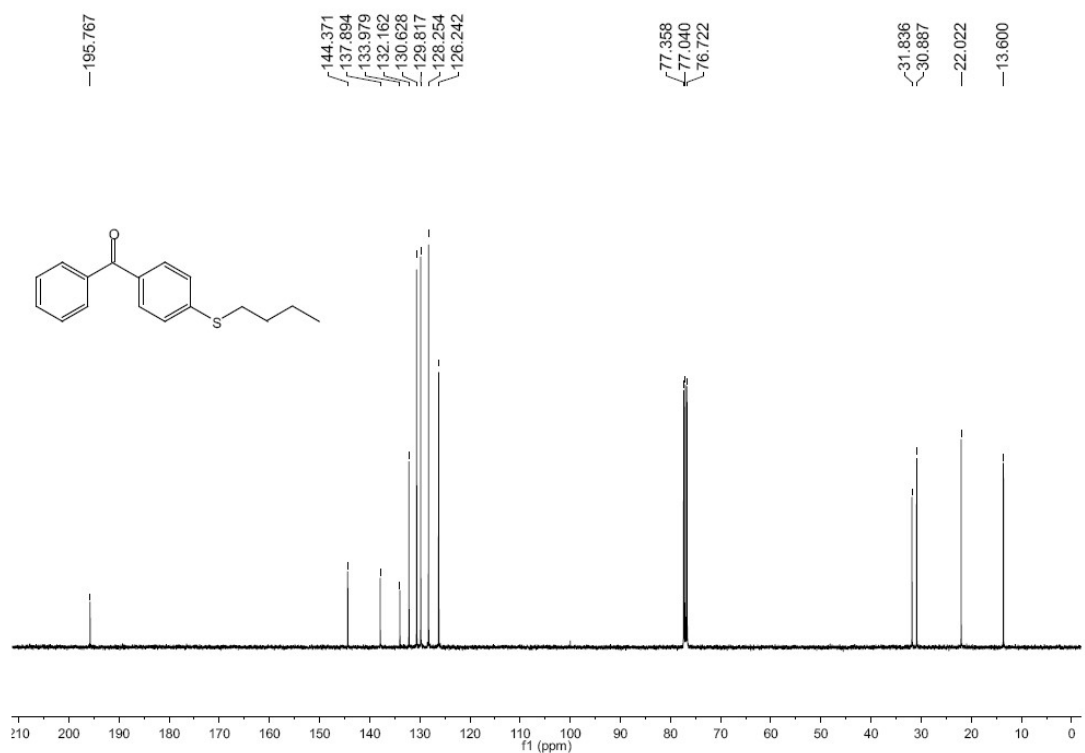

<sup>1</sup>H NMR and <sup>13</sup>C NMR spectra of compounds **4i** (in CDCl<sub>3</sub>)

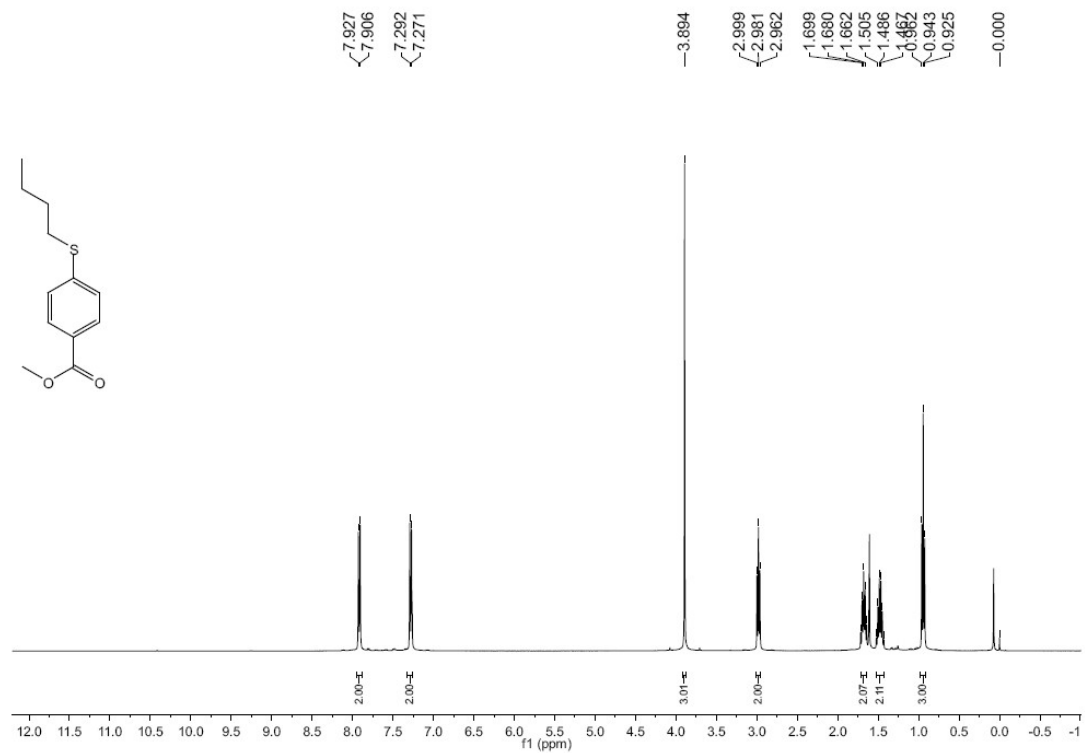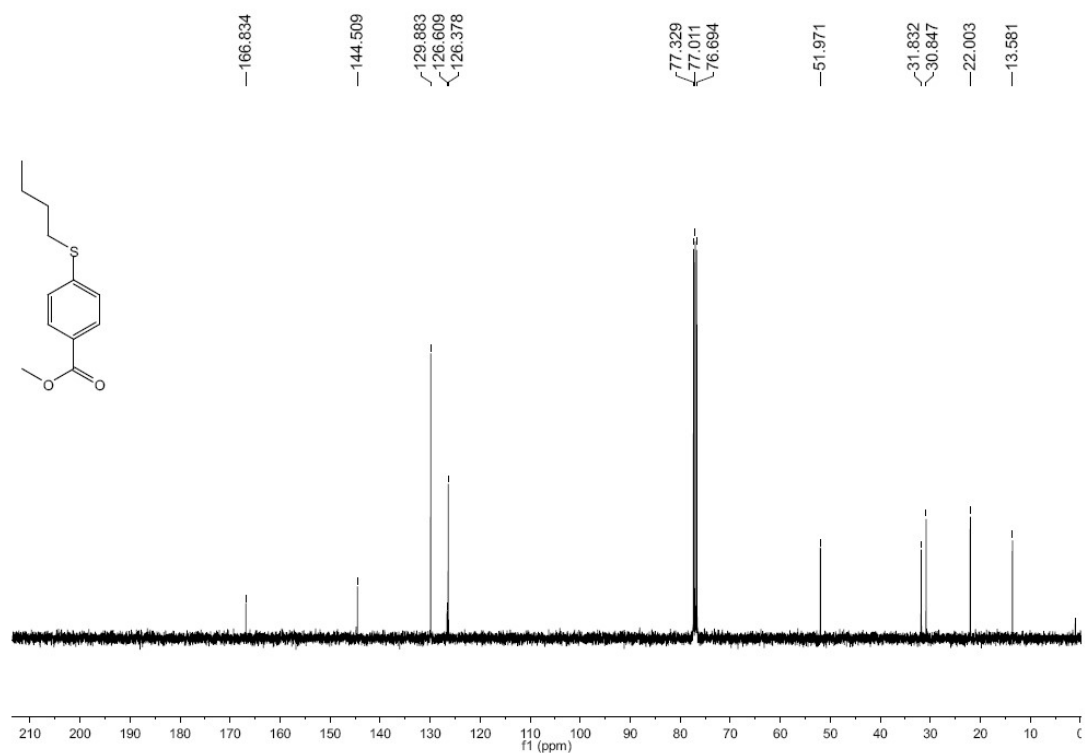

$^1\text{H}$  NMR and  $^{13}\text{C}$  NMR spectra of compounds **4j** (in  $\text{CDCl}_3$ )

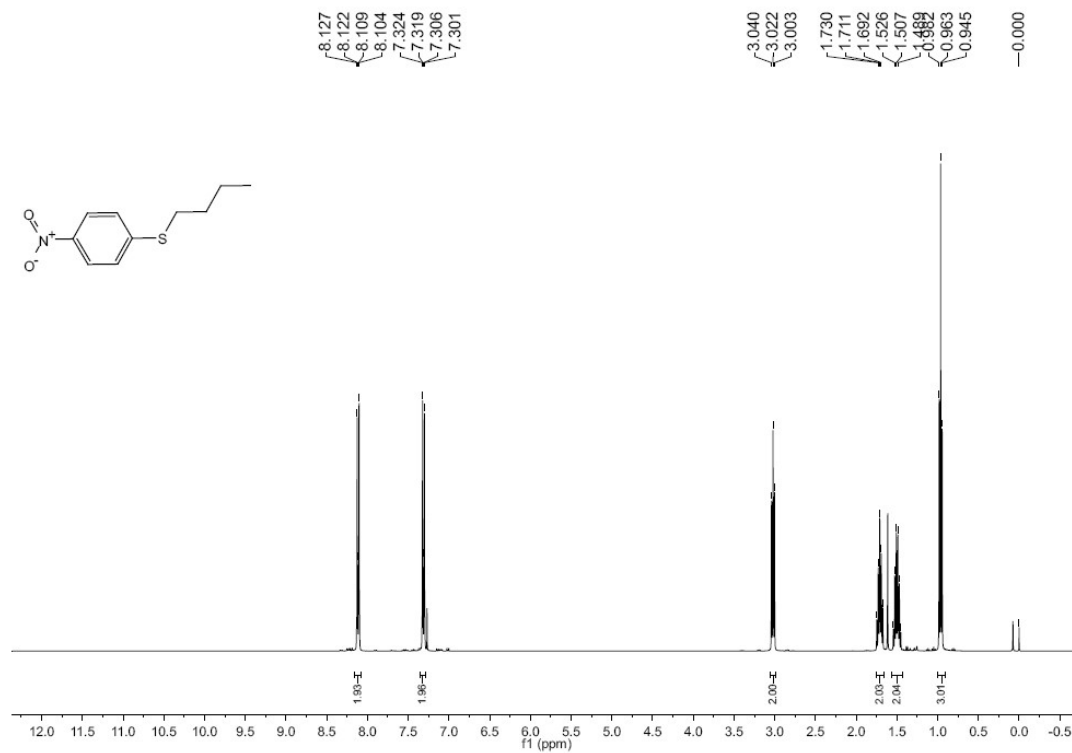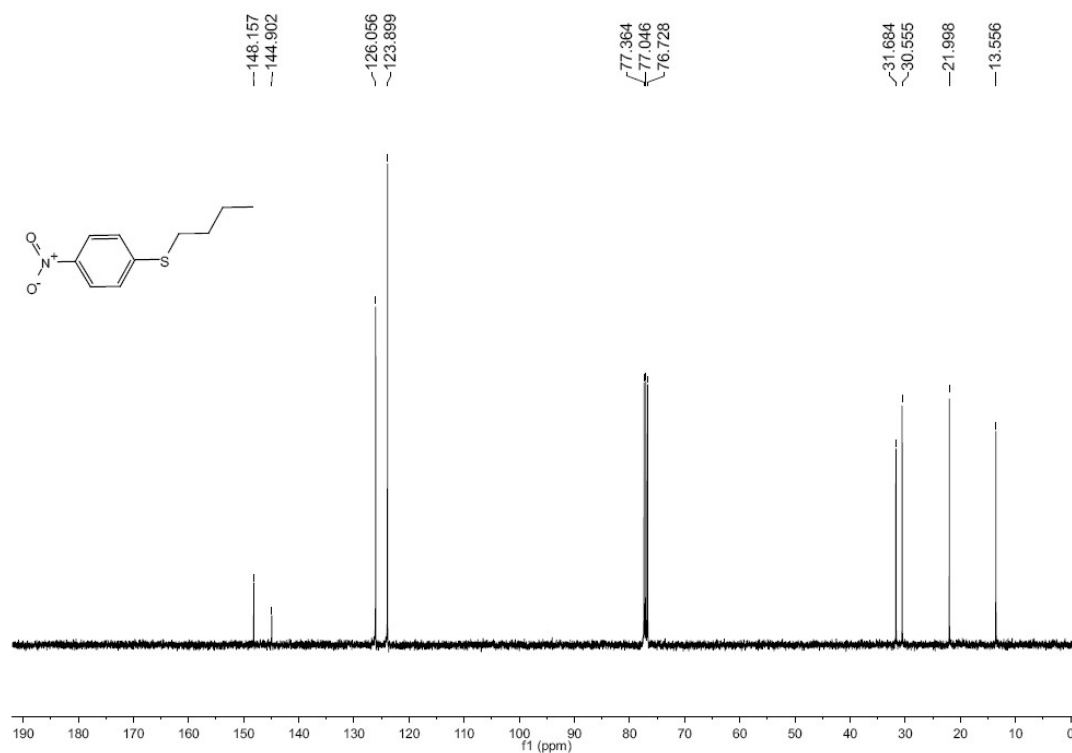

<sup>1</sup>H NMR and <sup>13</sup>C NMR spectra of compounds **4k** (in CDCl<sub>3</sub>)



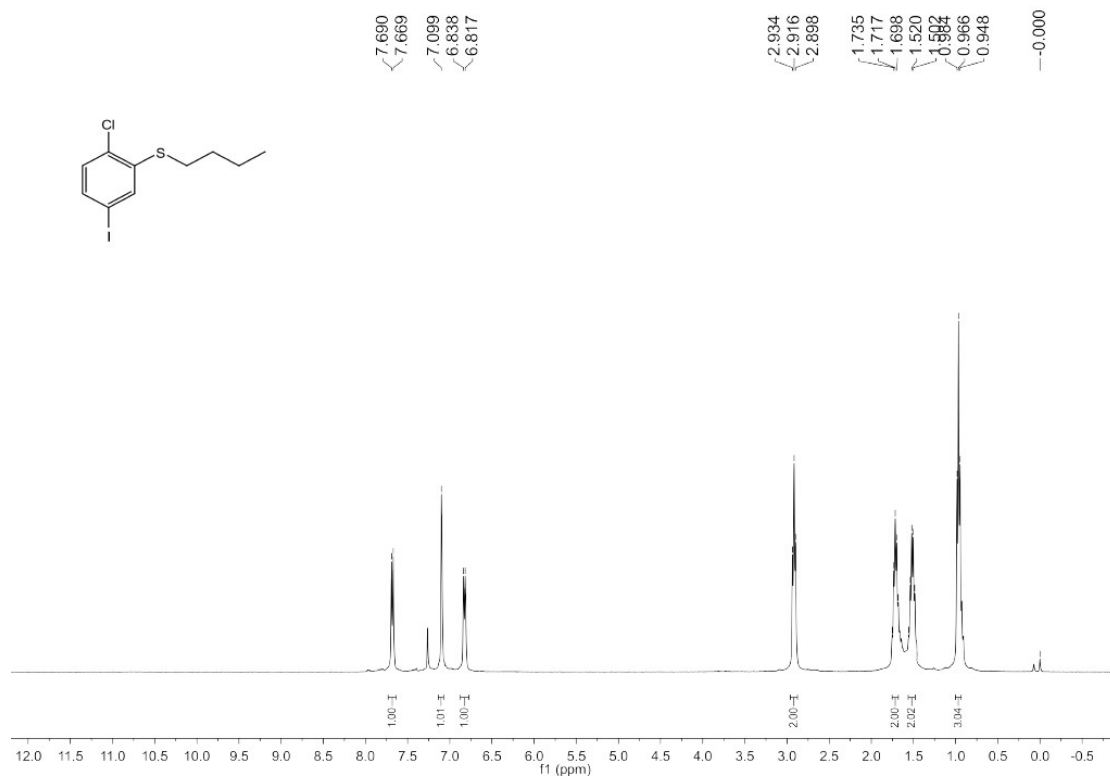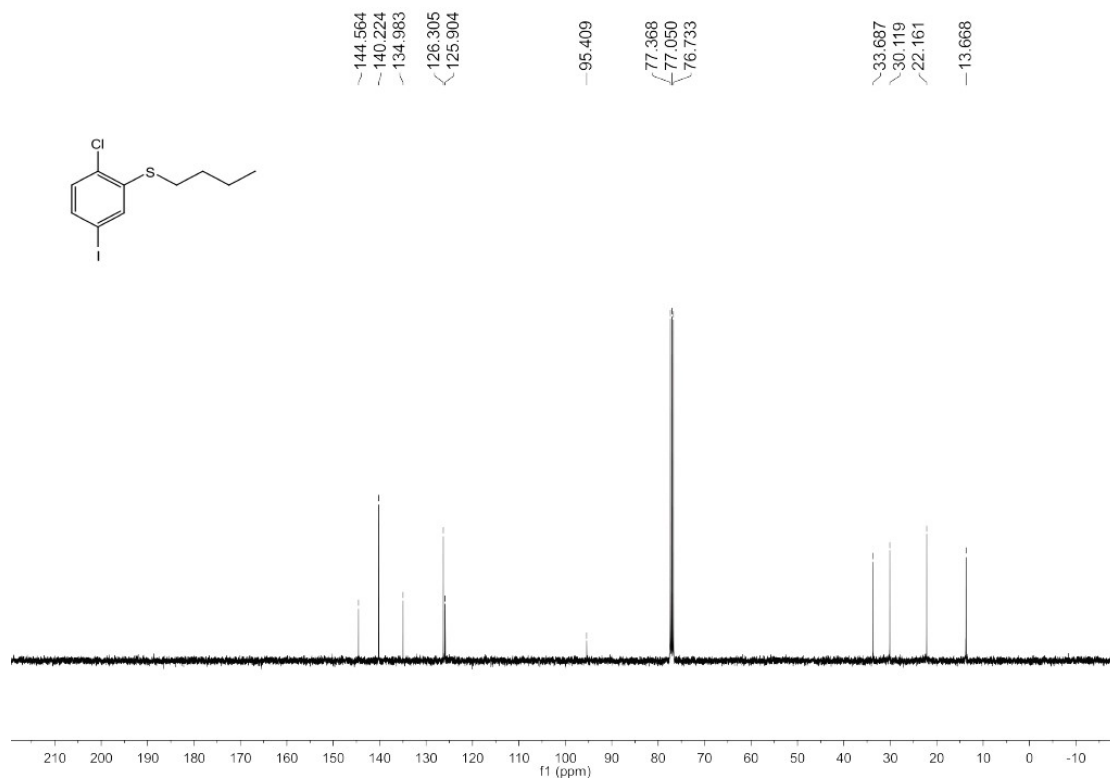

<sup>1</sup>H NMR and <sup>13</sup>C NMR spectra of compounds **4I** (in CDCl<sub>3</sub>)

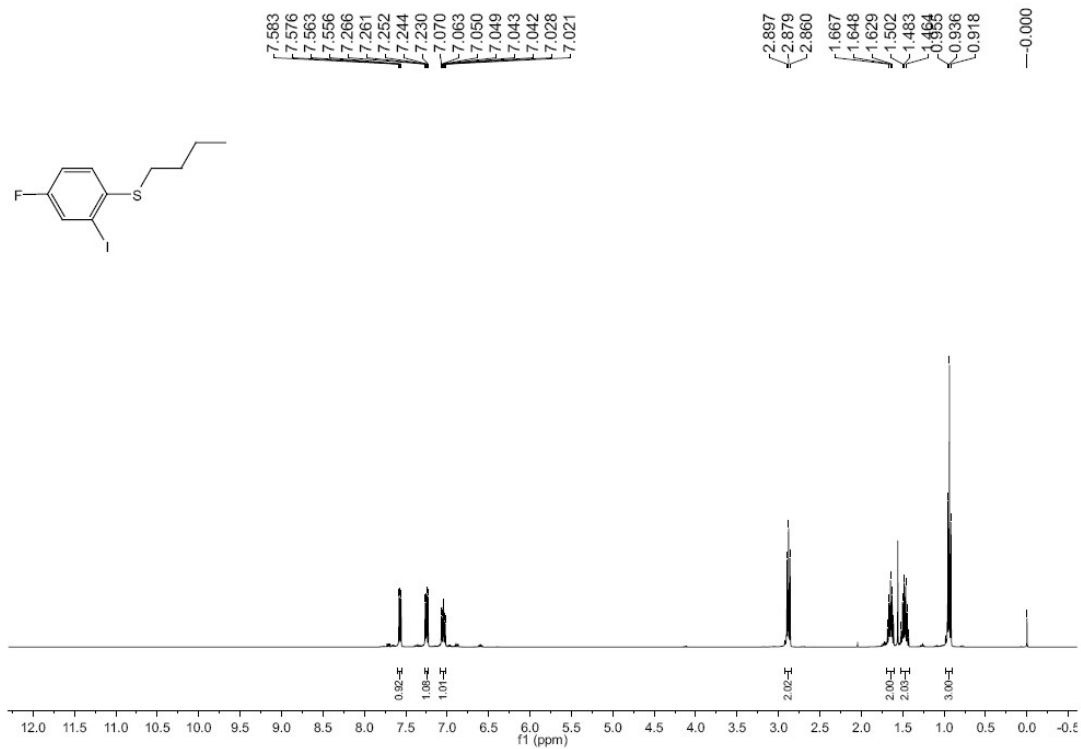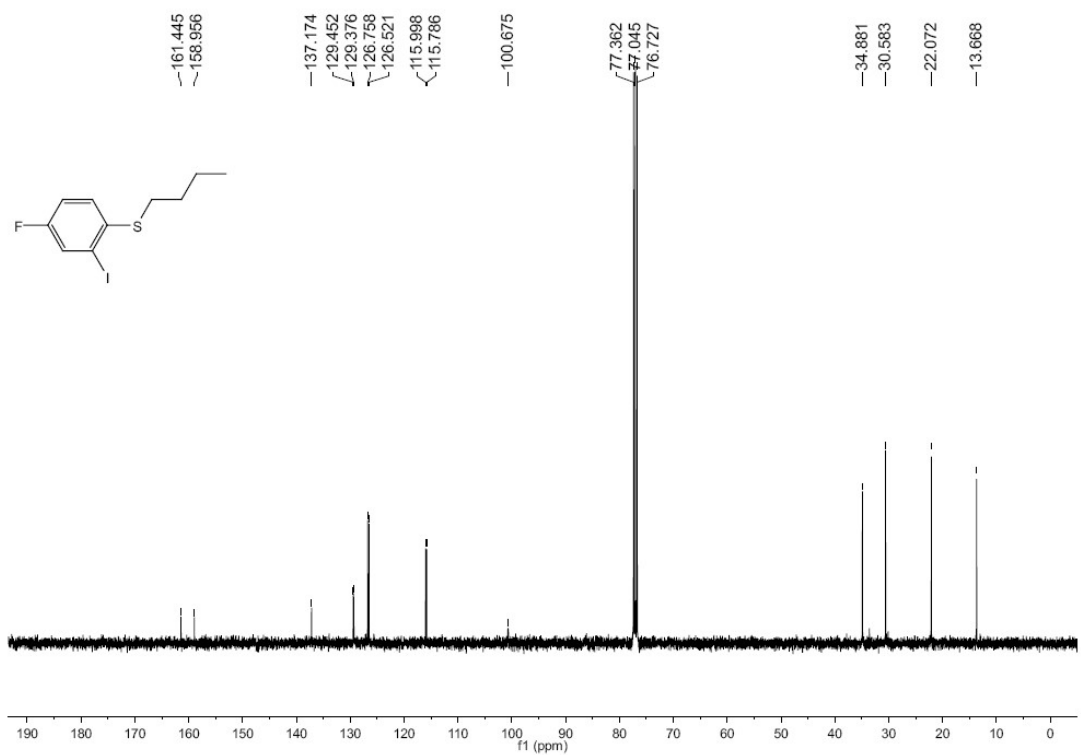

<sup>1</sup>H NMR and <sup>13</sup>C NMR spectra of compounds **4m** (in CDCl<sub>3</sub>)

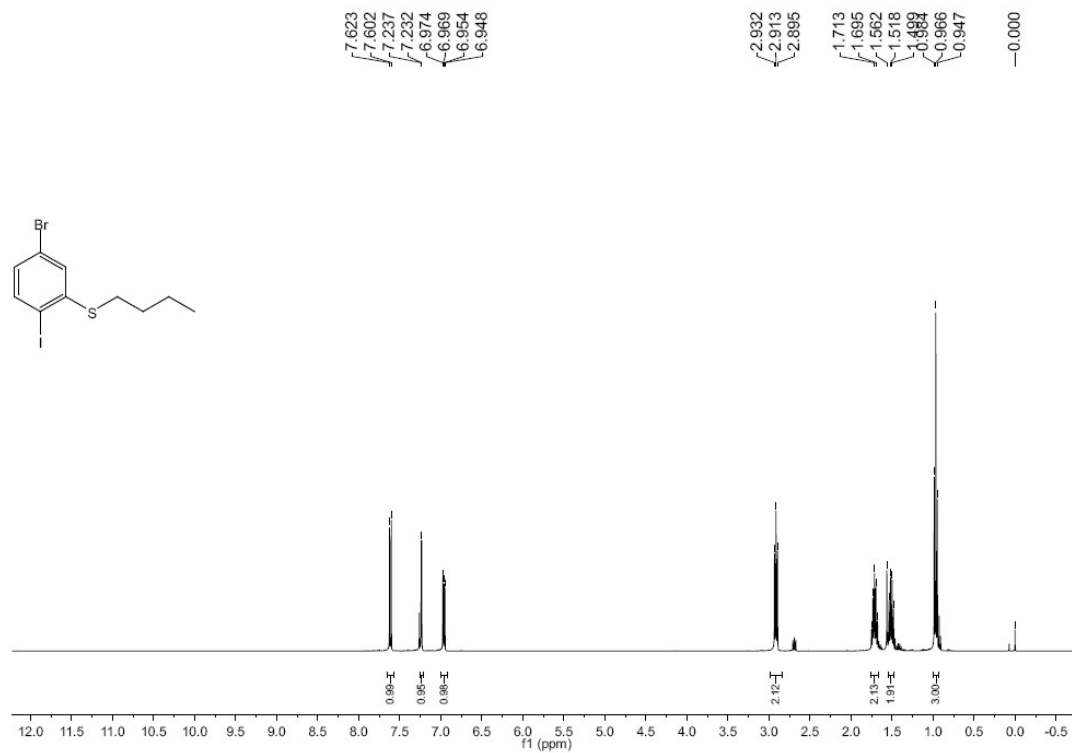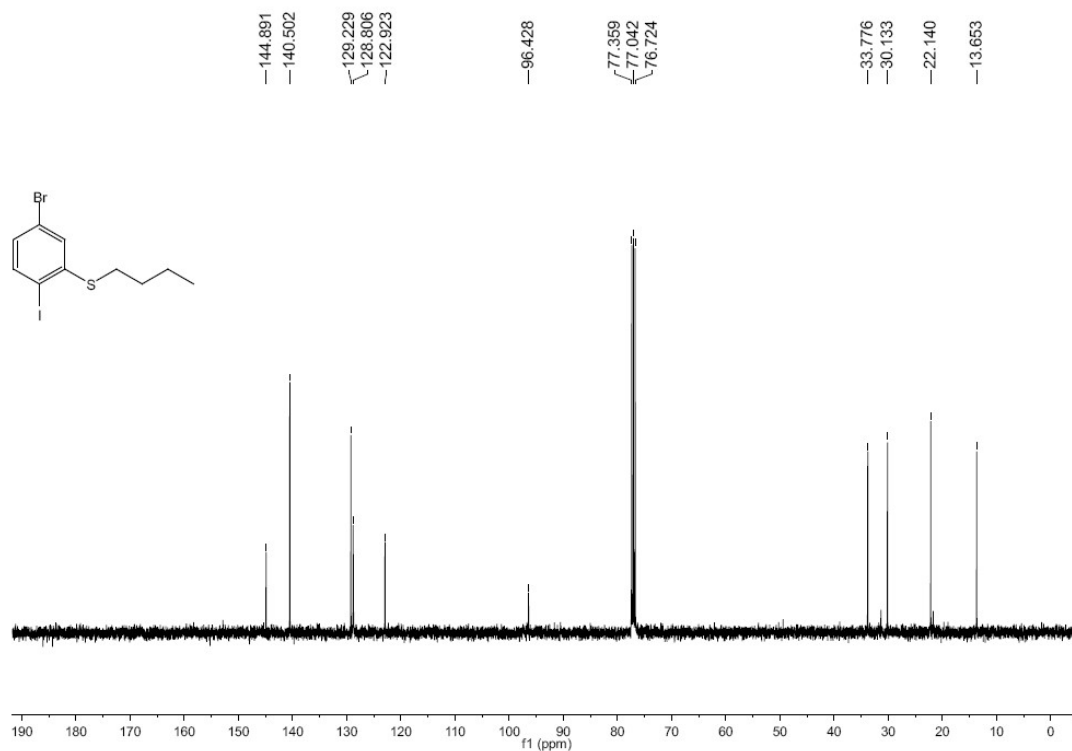

$^1\text{H}$  NMR and  $^{13}\text{C}$  NMR spectra of compounds **4n** (in  $\text{CDCl}_3$ )

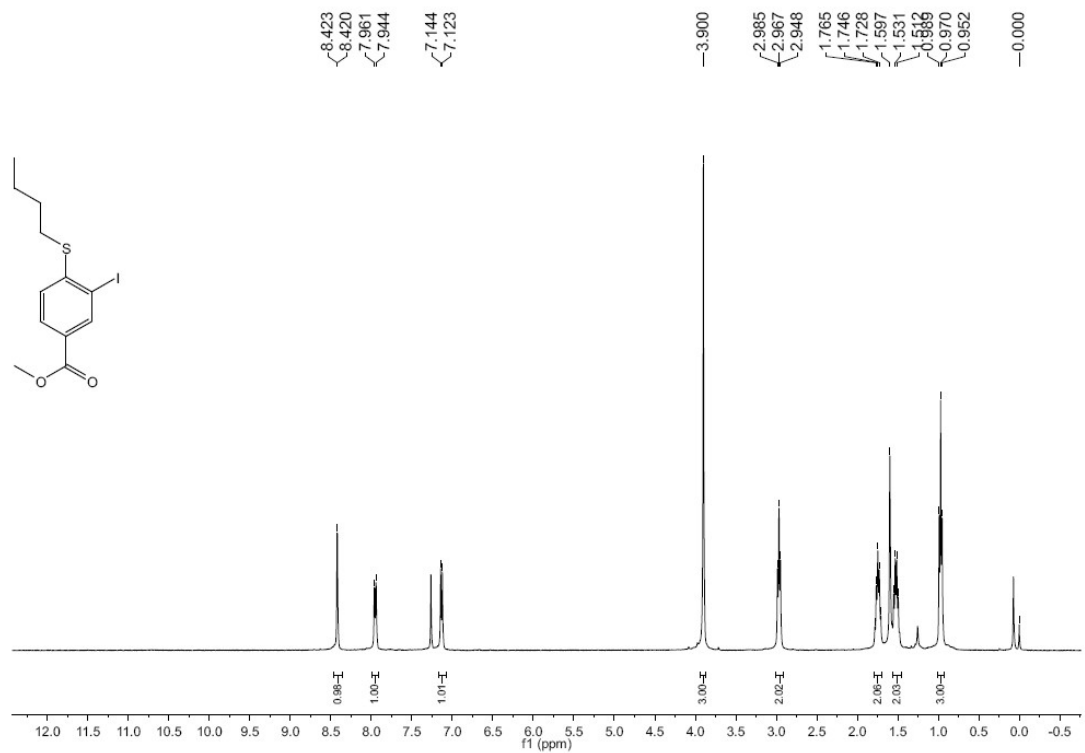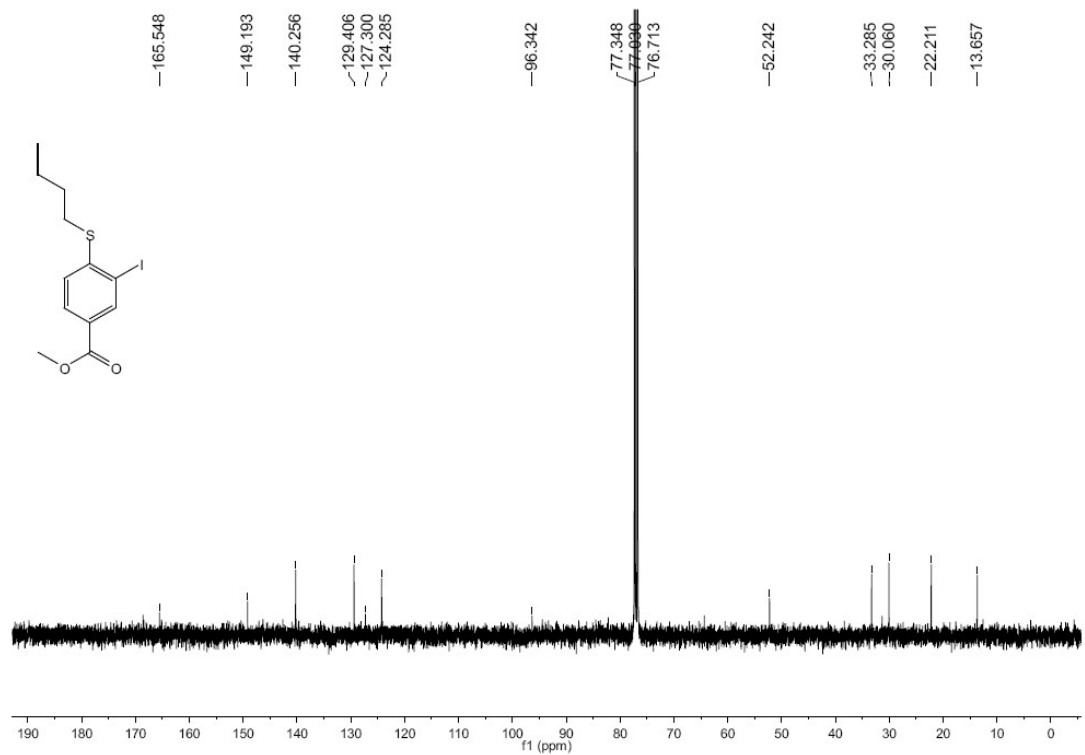

<sup>1</sup>H NMR and <sup>13</sup>C NMR spectra of compounds **4o** (in CDCl<sub>3</sub>)

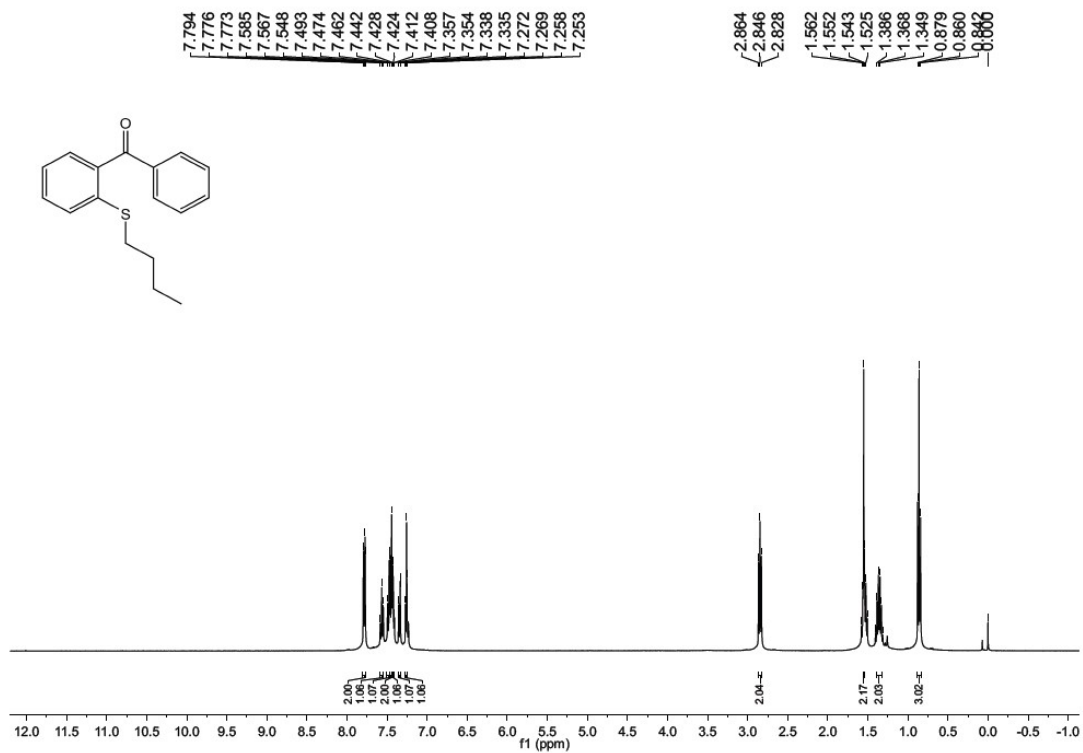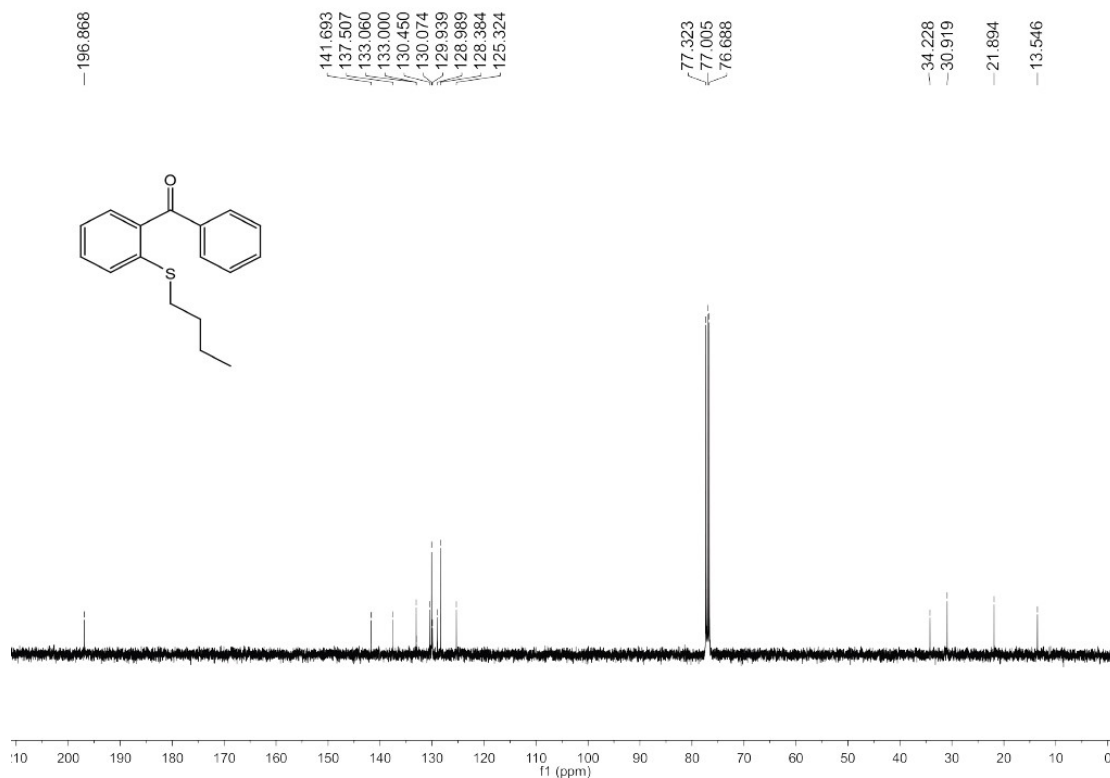

<sup>1</sup>H NMR and <sup>13</sup>C NMR spectra of compounds **4p** (in CDCl<sub>3</sub>)

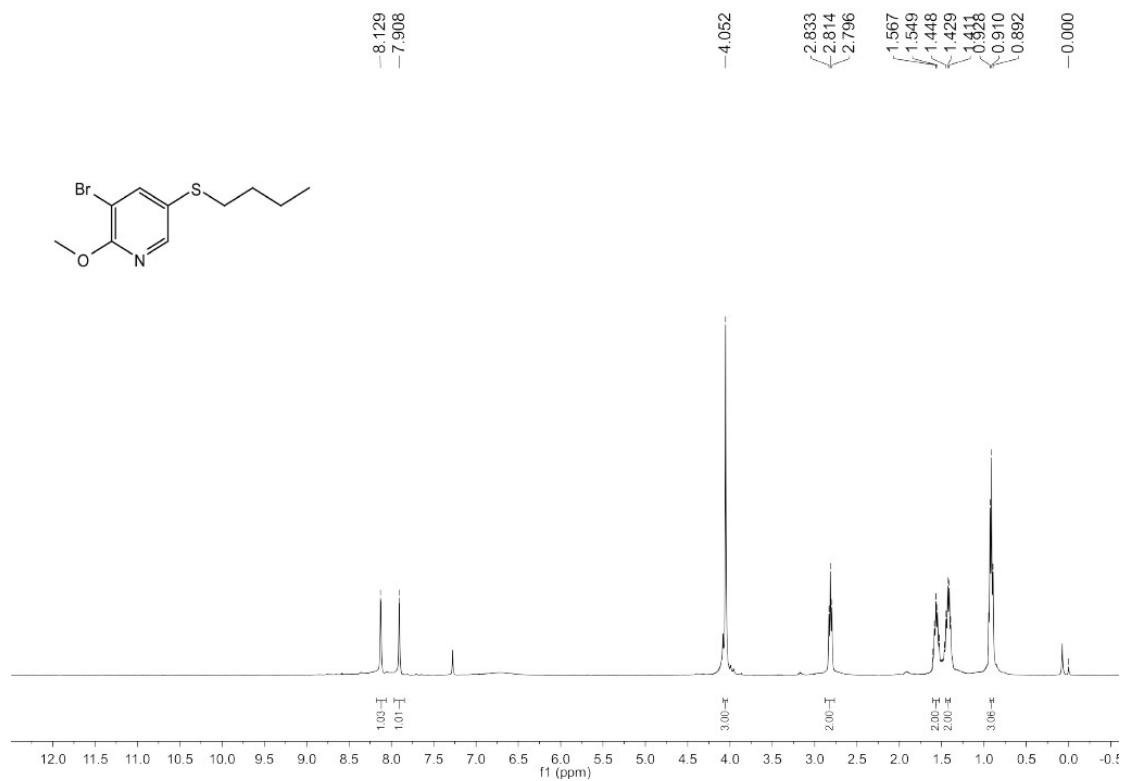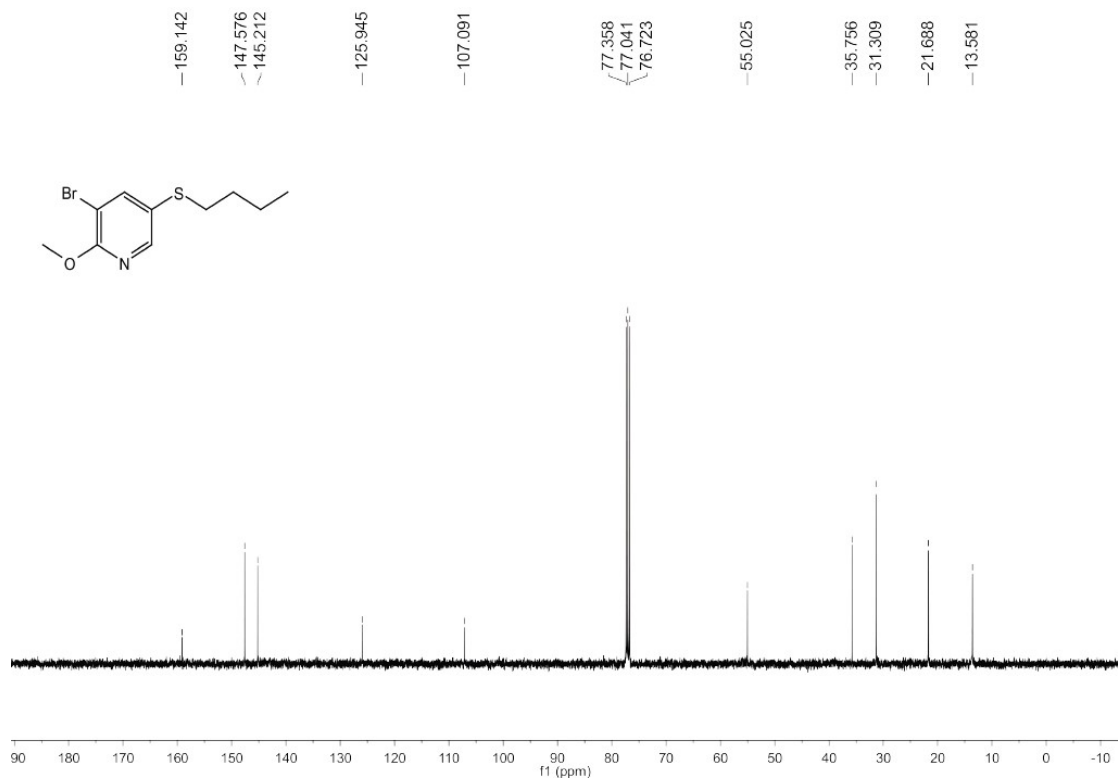

$^1\text{H}$  NMR and  $^{13}\text{C}$  NMR spectra of compounds **4q** (in  $\text{CDCl}_3$ )

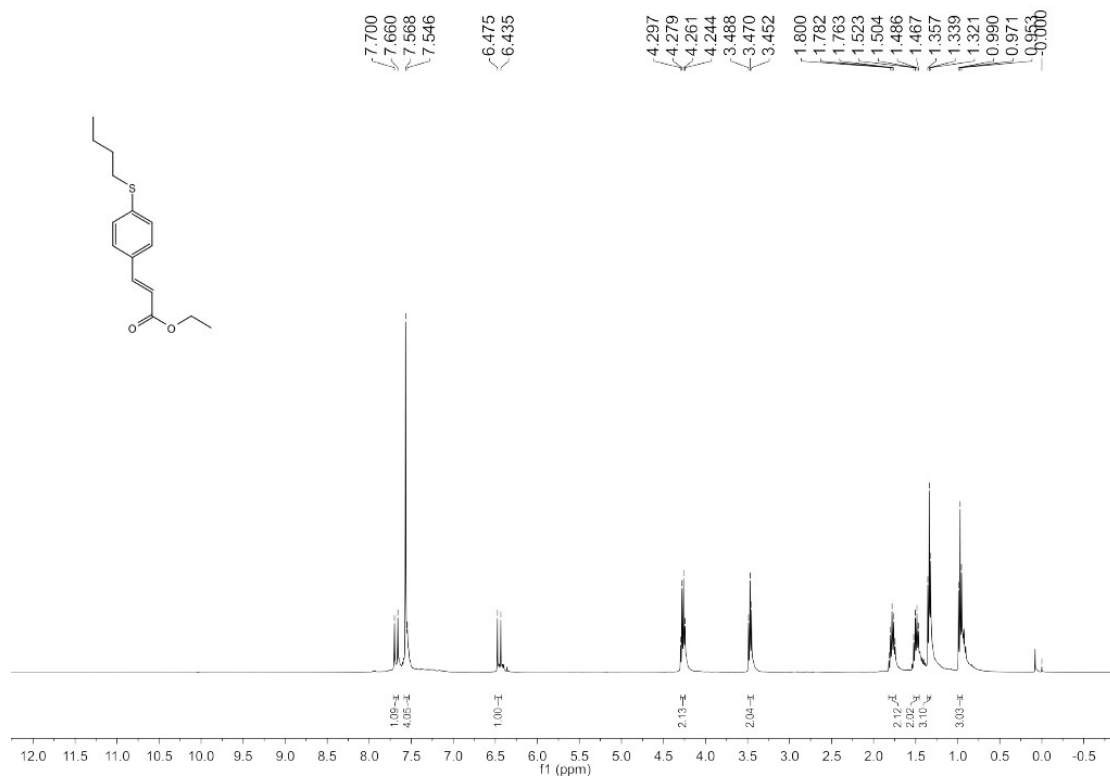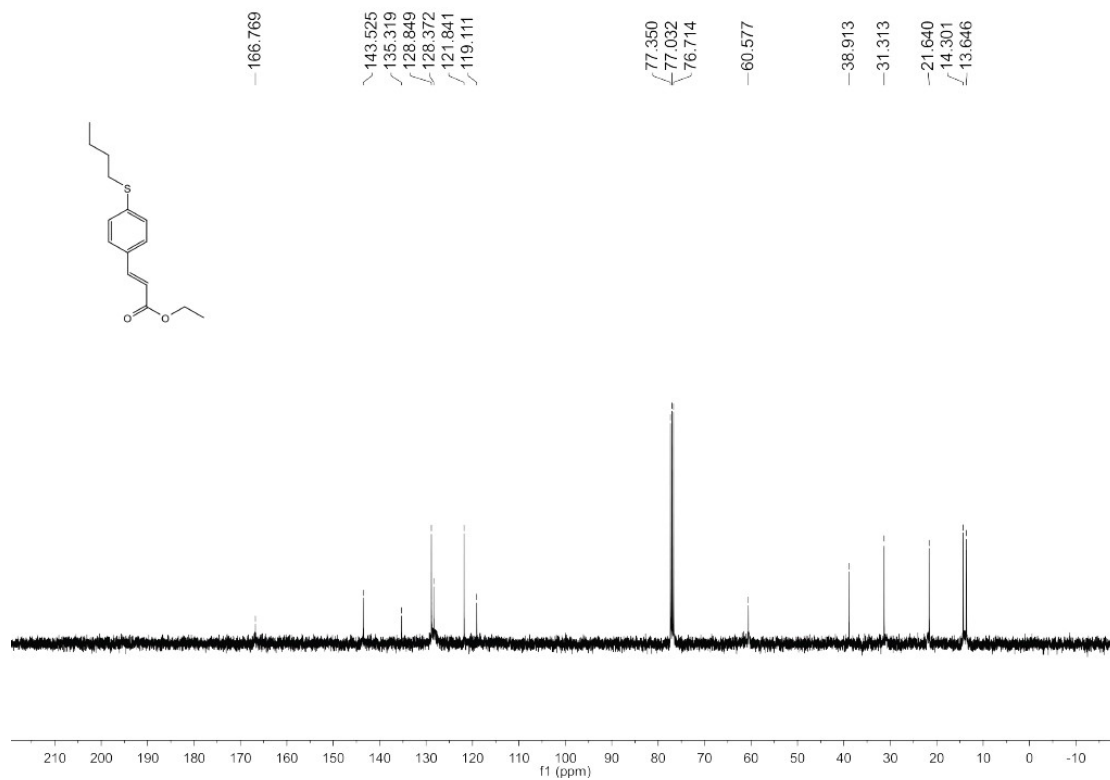

<sup>1</sup>H NMR and <sup>13</sup>C NMR spectra of compounds **4r** (in CDCl<sub>3</sub>)

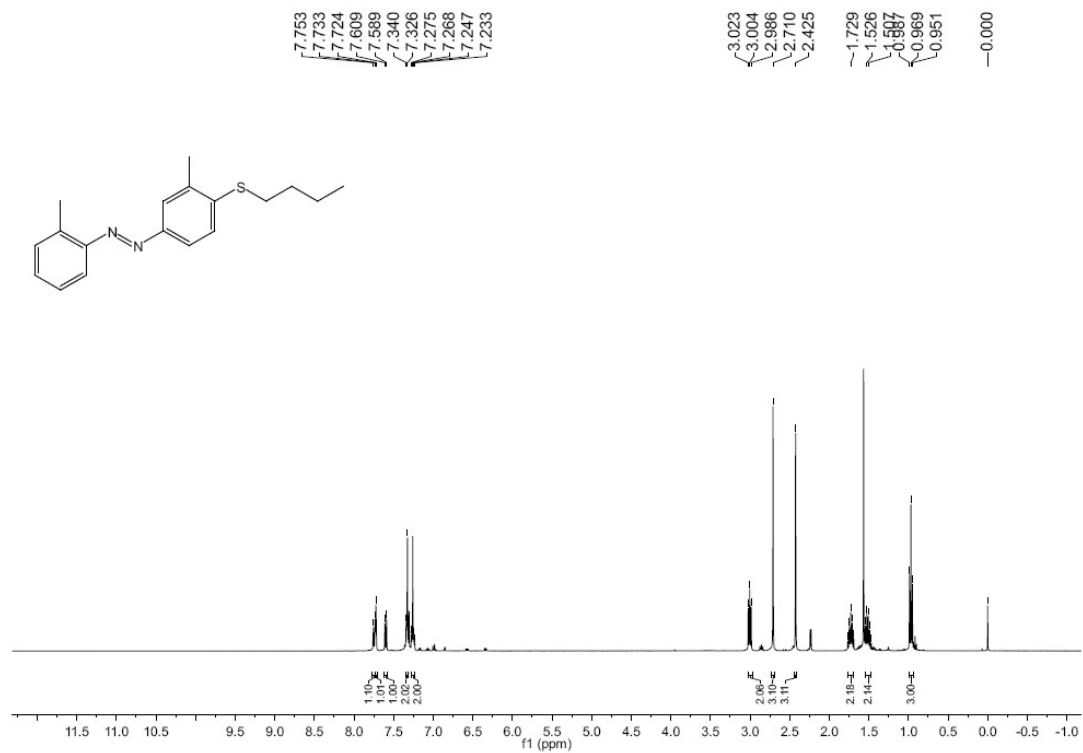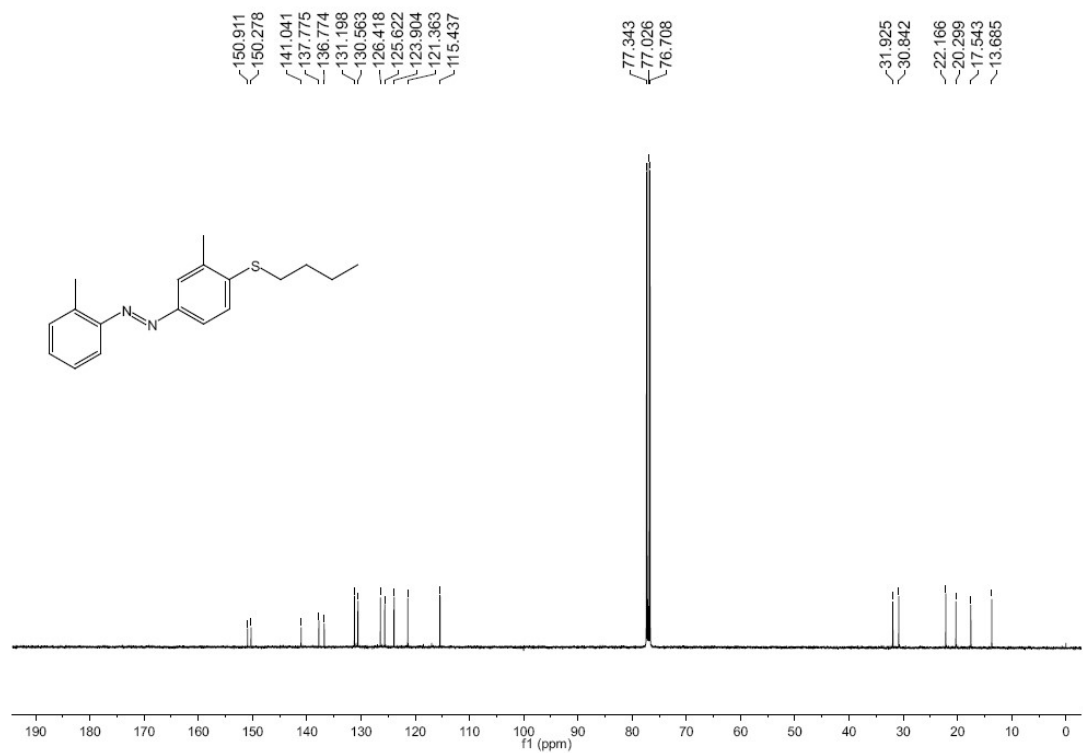

$^1\text{H}$  NMR and  $^{13}\text{C}$  NMR spectra of compounds **4s** (in  $\text{CDCl}_3$ )



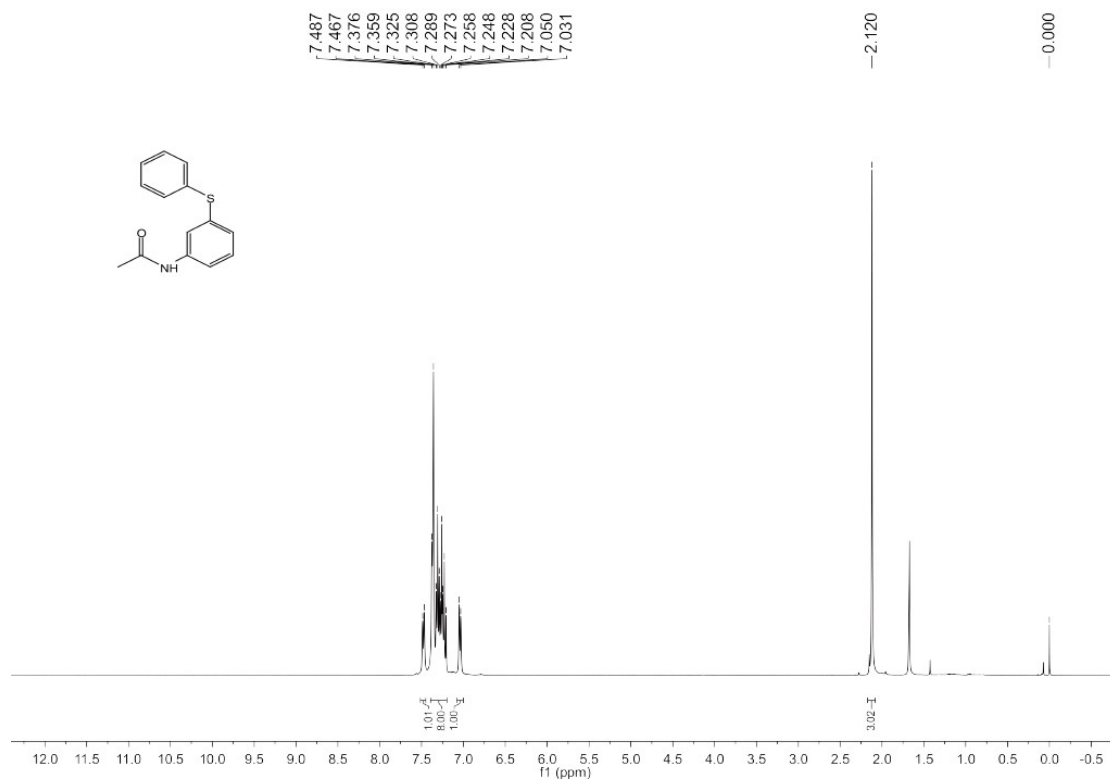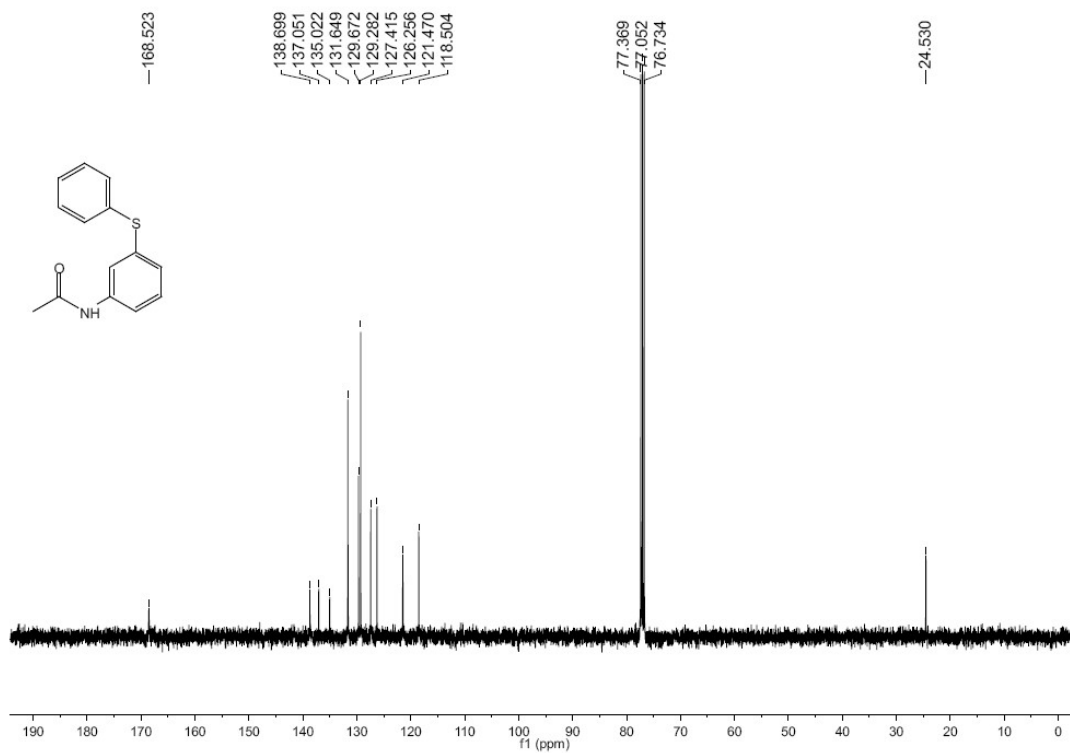

<sup>1</sup>H NMR and <sup>13</sup>C NMR spectra of compounds **4t** (in CDCl<sub>3</sub>)

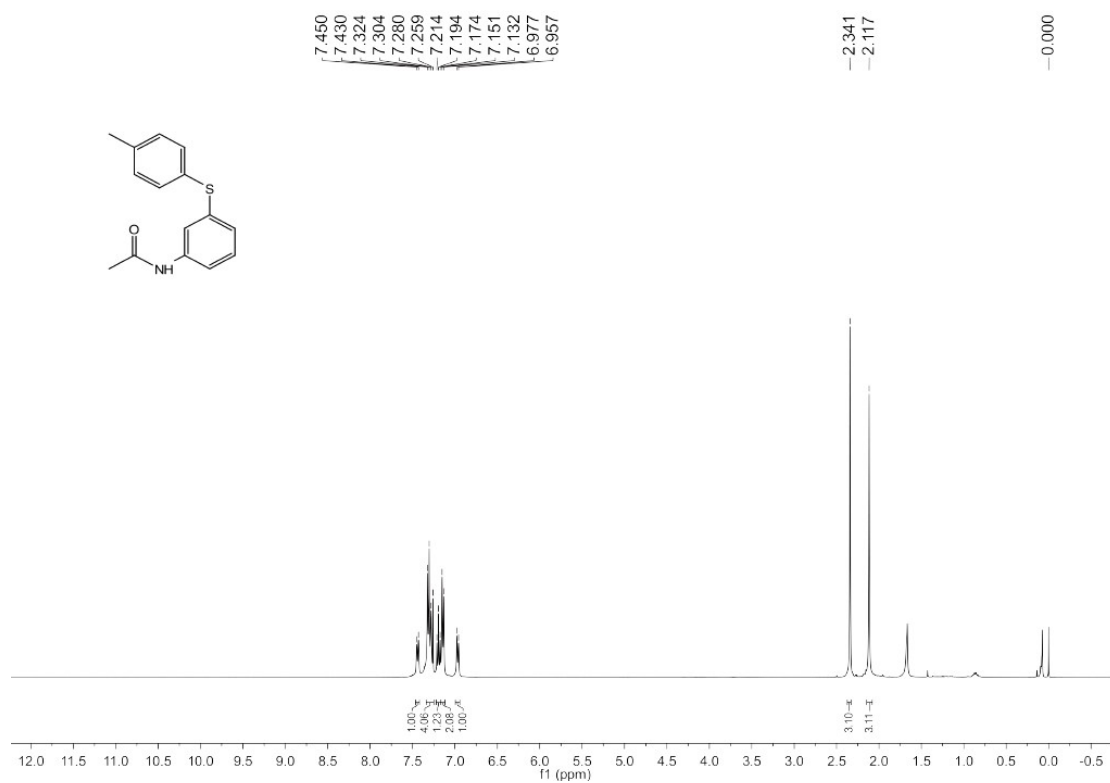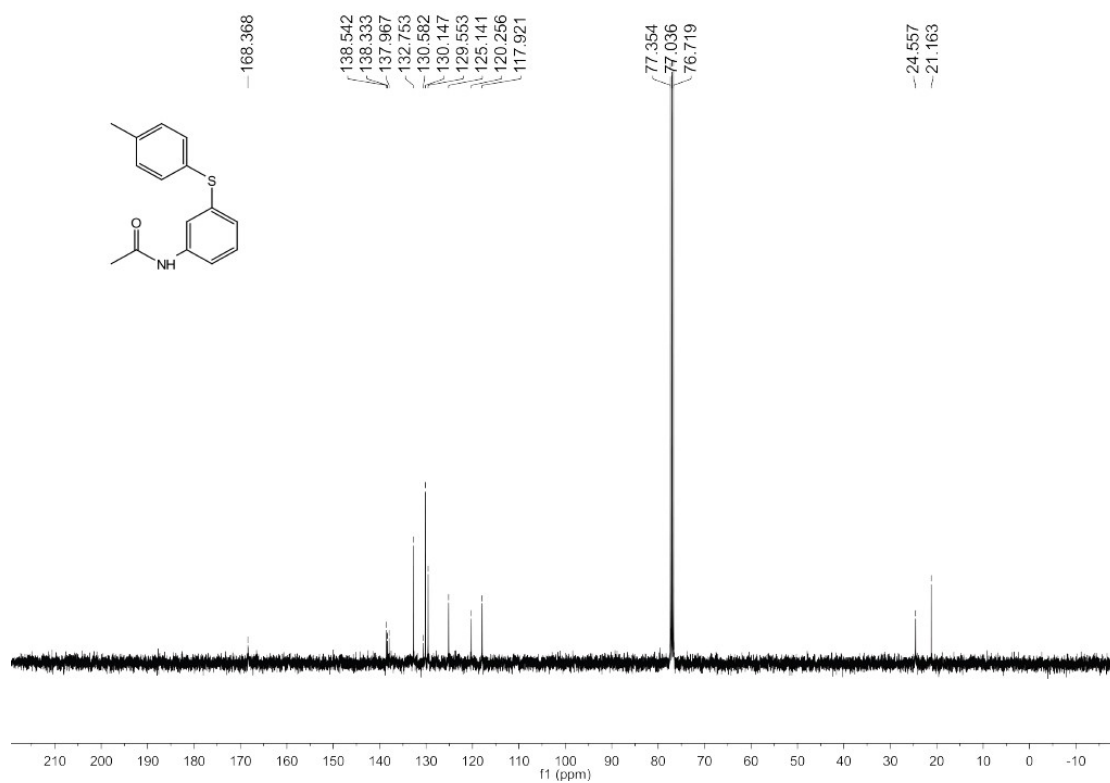

<sup>1</sup>H NMR and <sup>13</sup>C NMR spectra of compounds **4u** (in CDCl<sub>3</sub>)

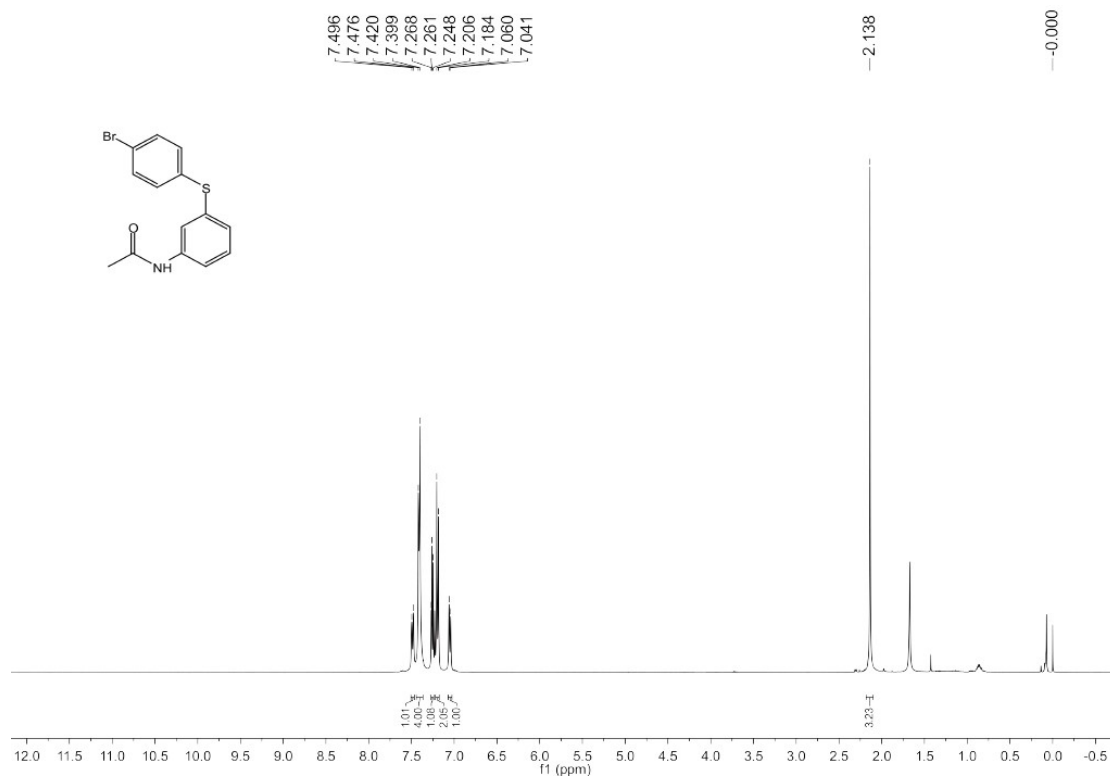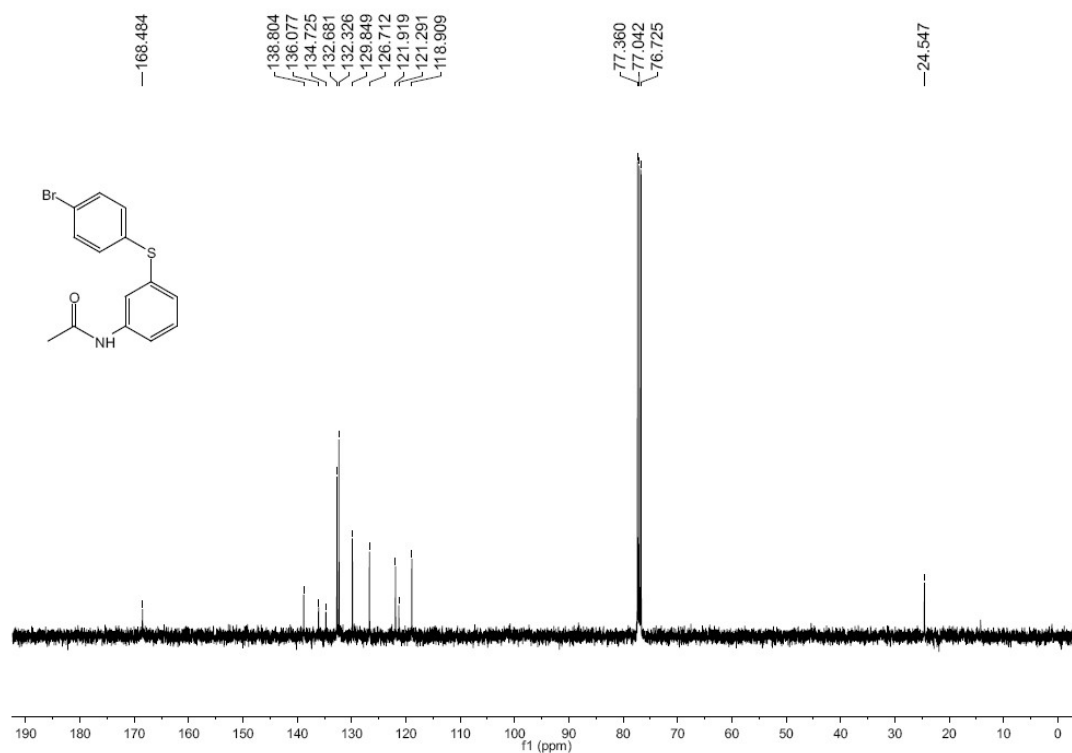

<sup>1</sup>H NMR and <sup>13</sup>C NMR spectra of compounds 4v (in CDCl<sub>3</sub>)

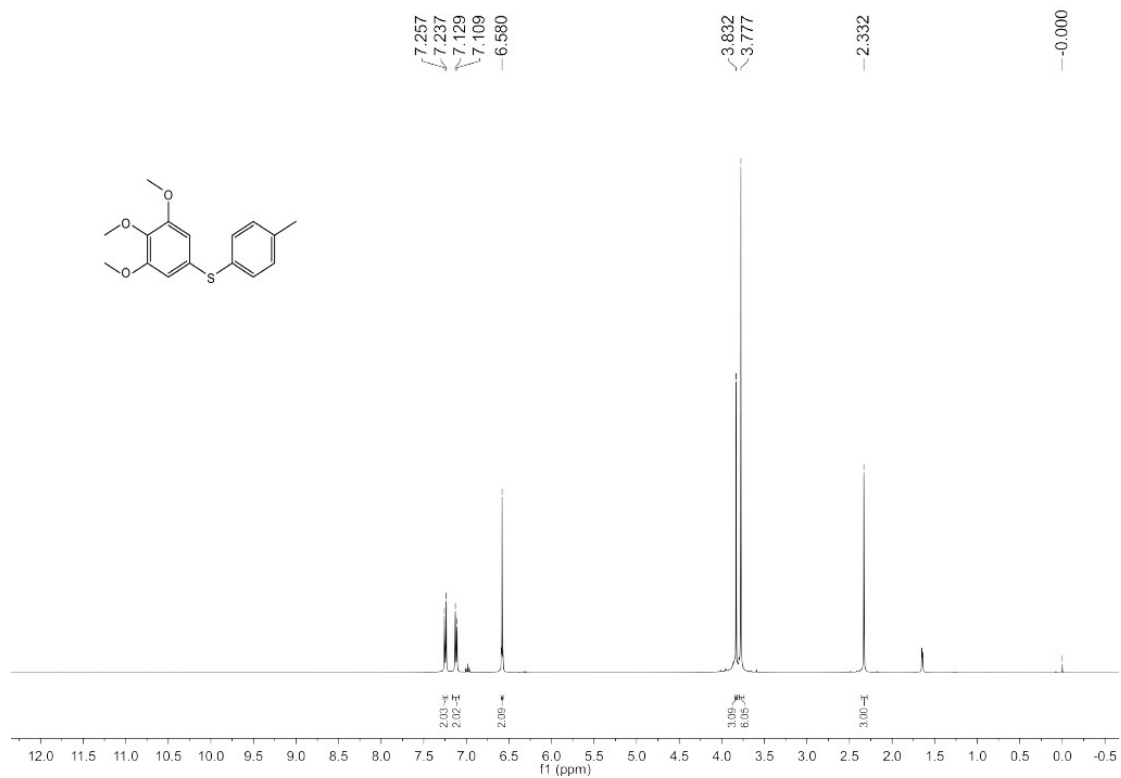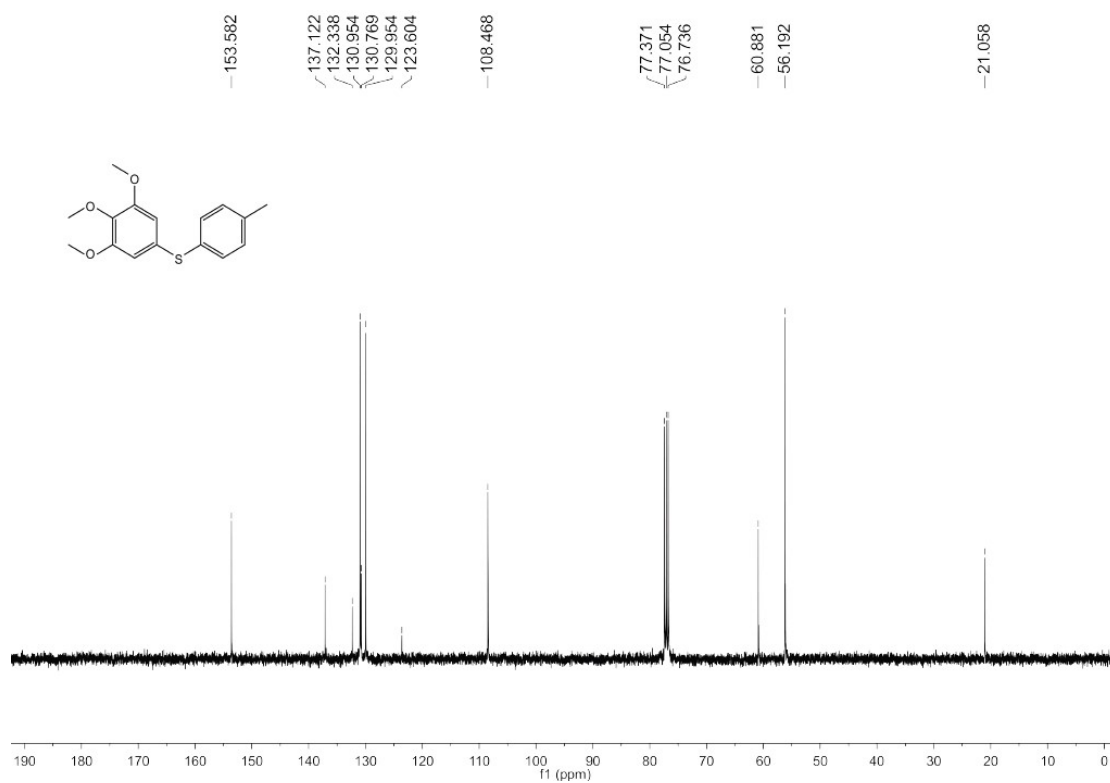

<sup>1</sup>H NMR and <sup>13</sup>C NMR spectra of compounds **4w** (in CDCl<sub>3</sub>)

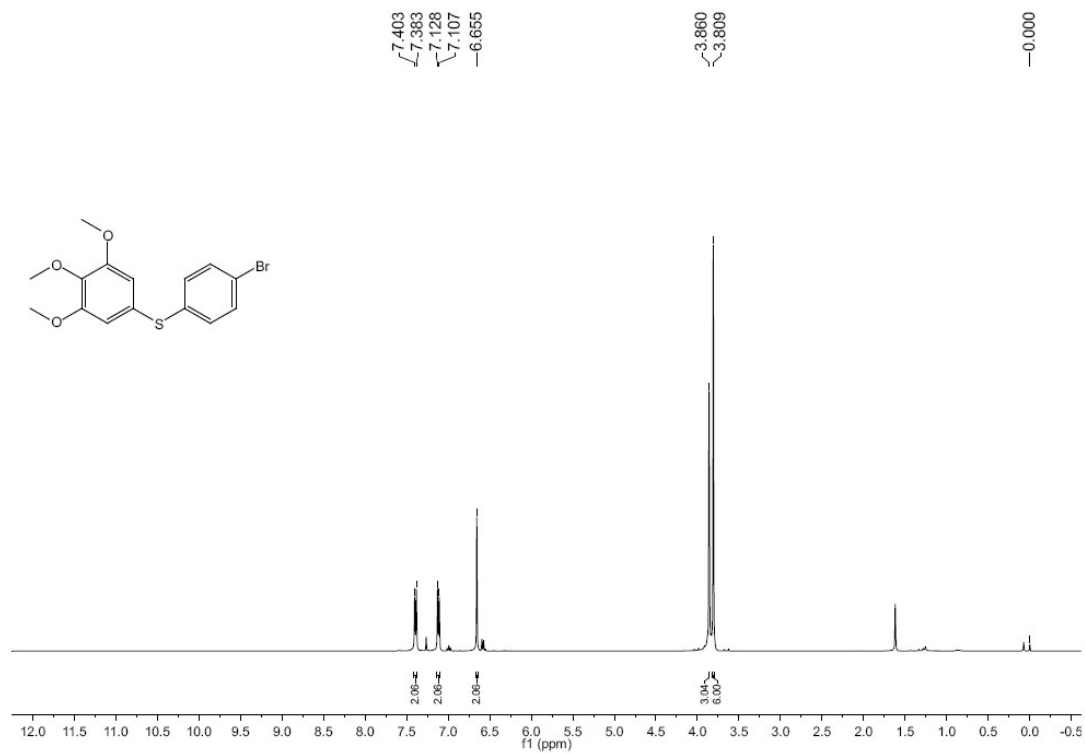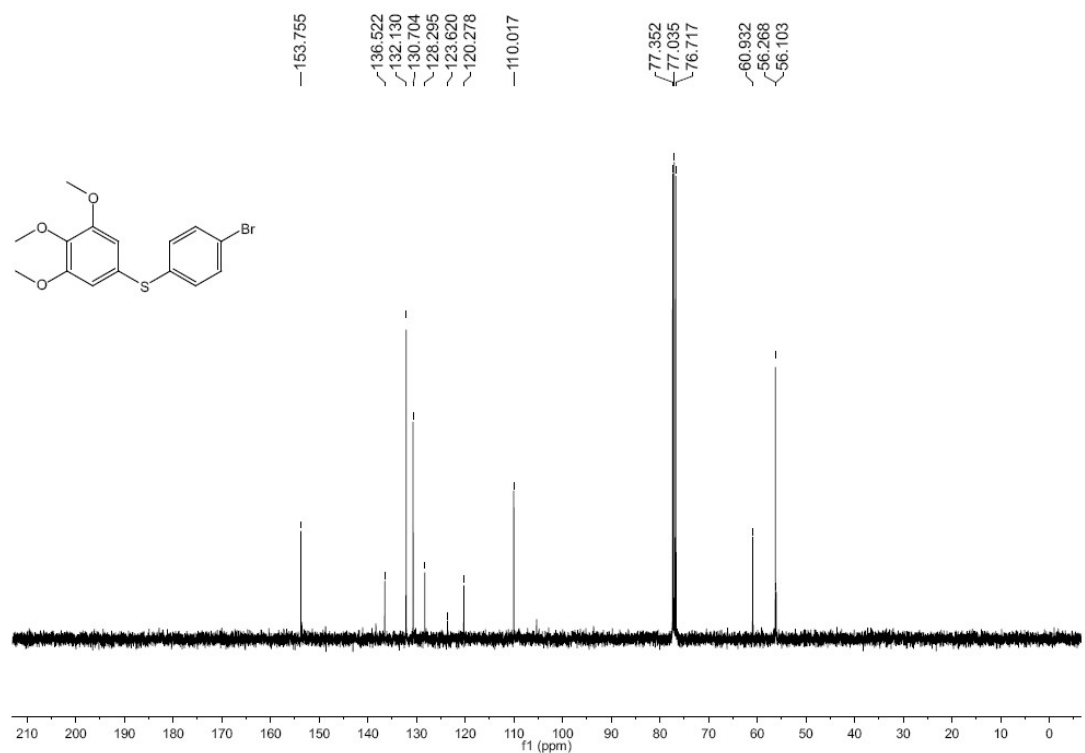

<sup>1</sup>H NMR and <sup>13</sup>C NMR spectra of compounds **4x** (in CDCl<sub>3</sub>)

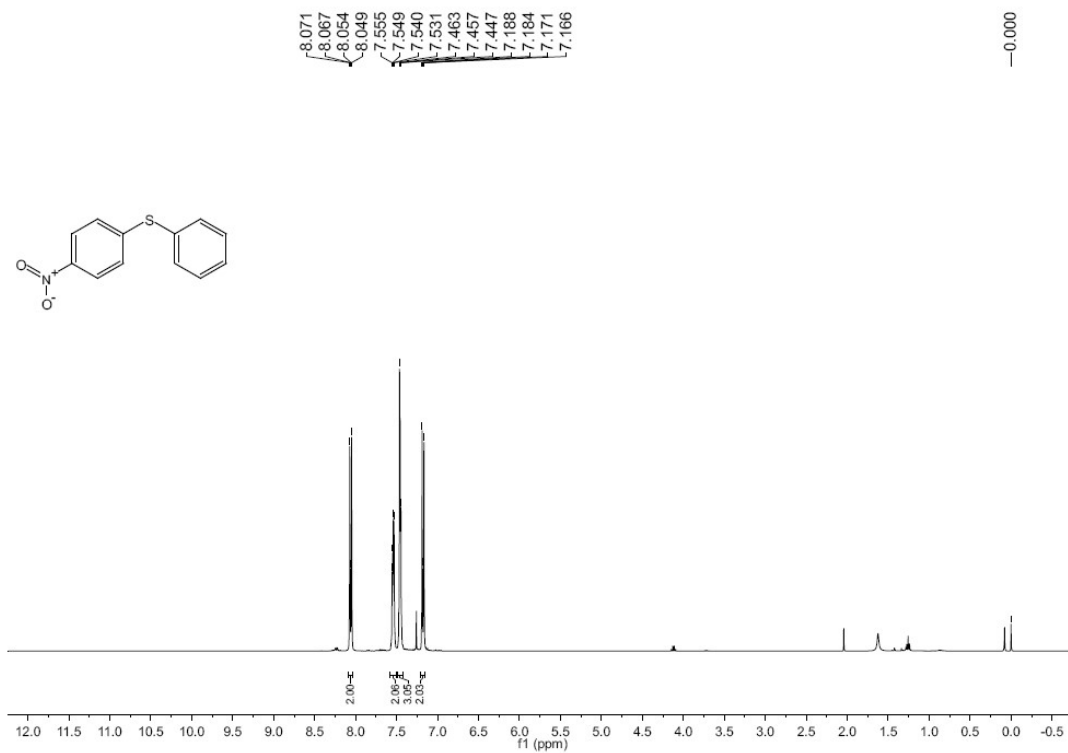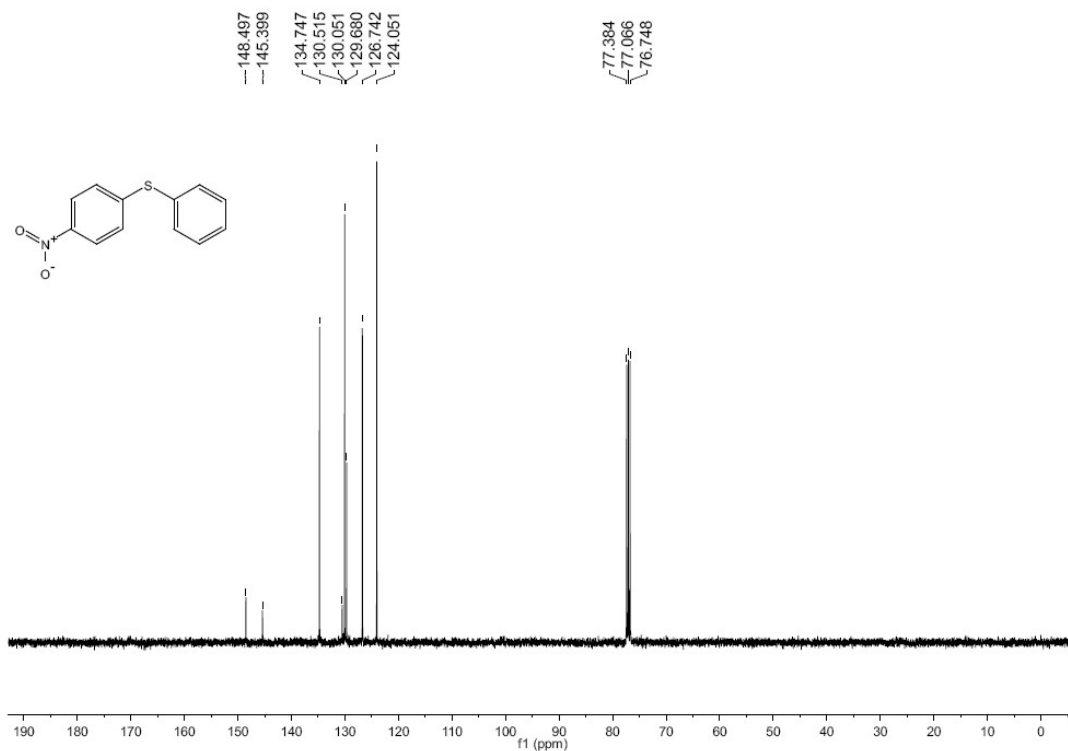

<sup>1</sup>H NMR and <sup>13</sup>C NMR spectra of compounds **4y** (in CDCl<sub>3</sub>)

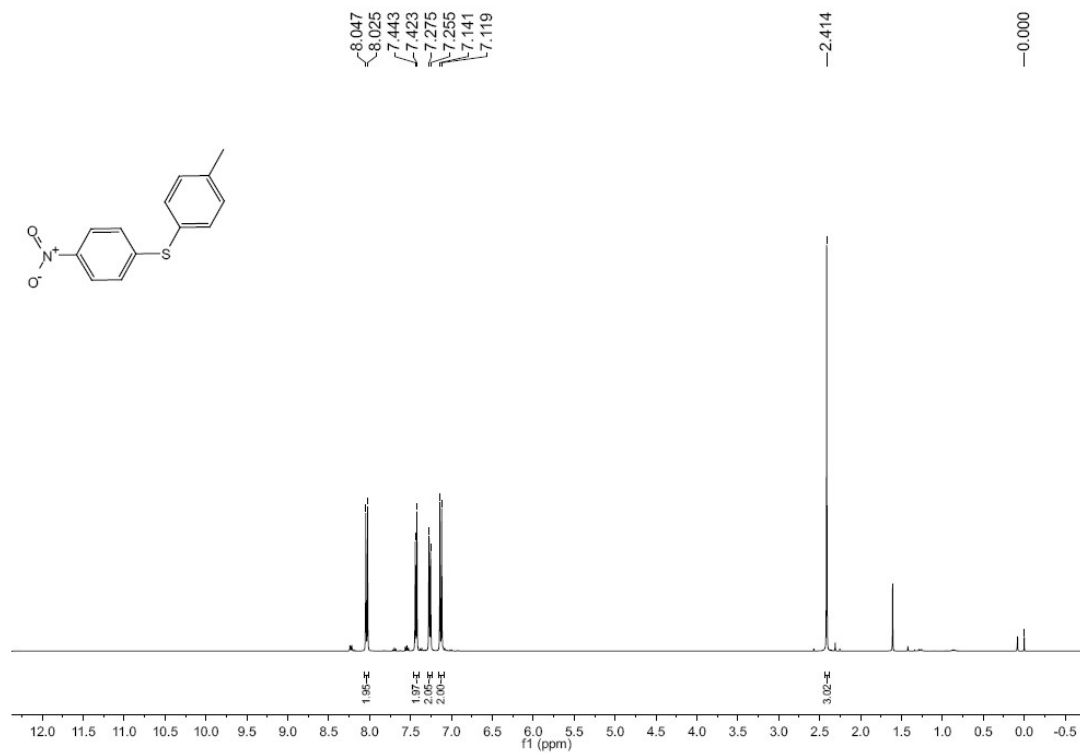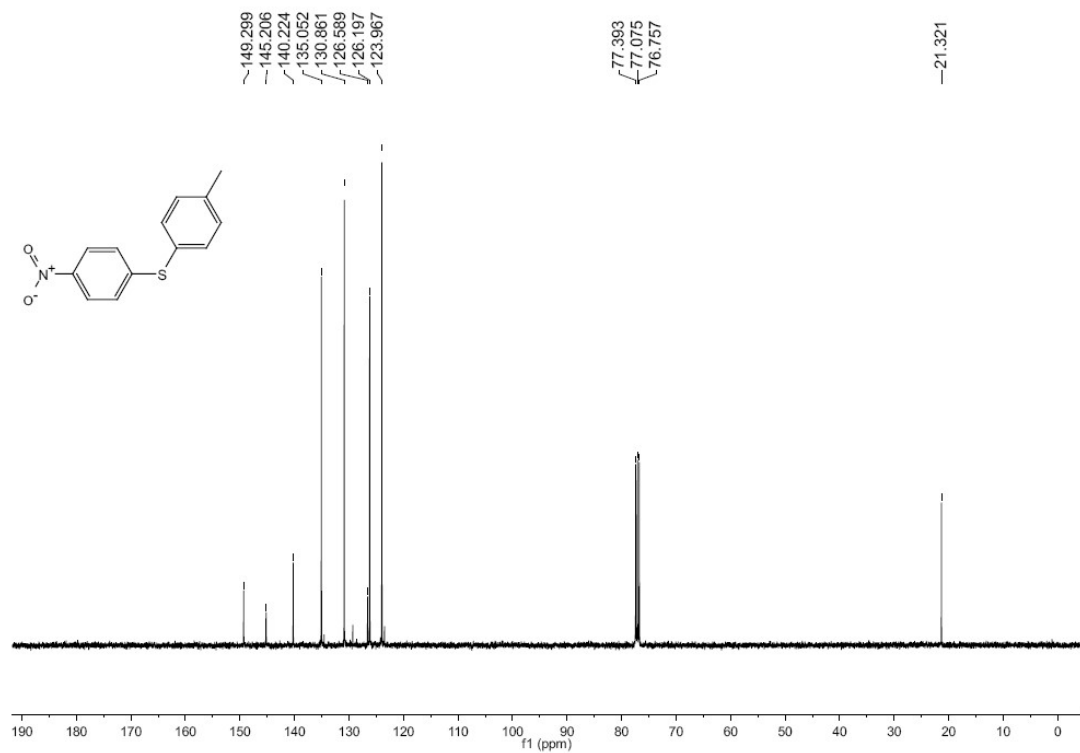

<sup>1</sup>H NMR and <sup>13</sup>C NMR spectra of compounds **4z** (in CDCl<sub>3</sub>)

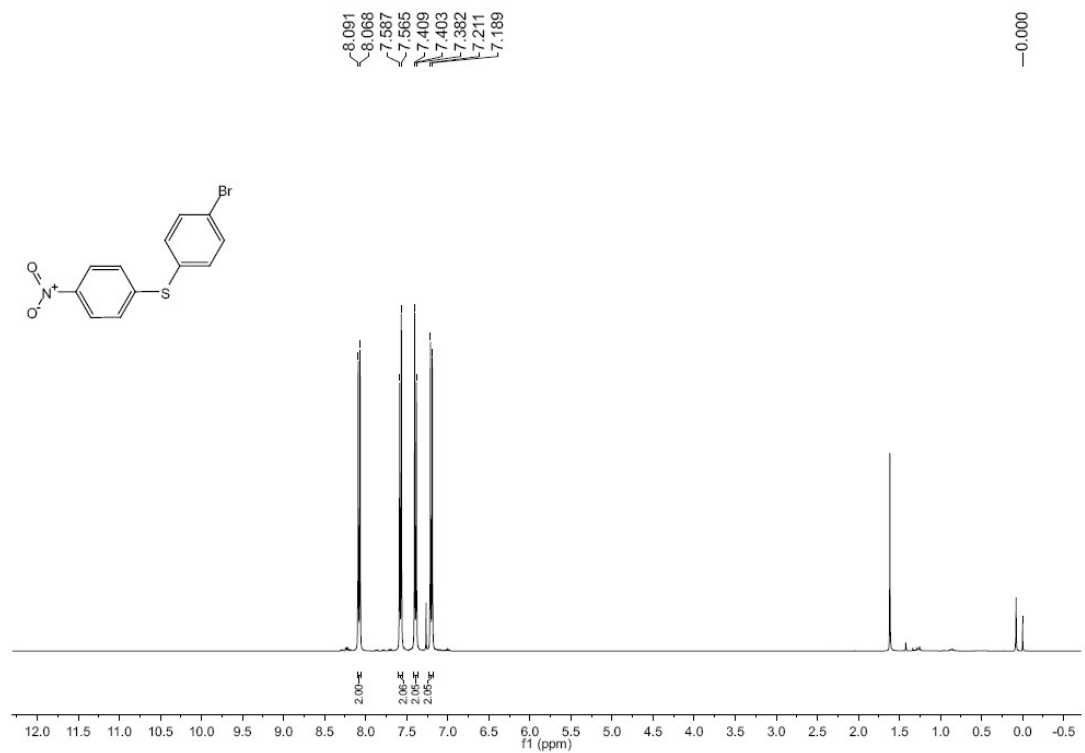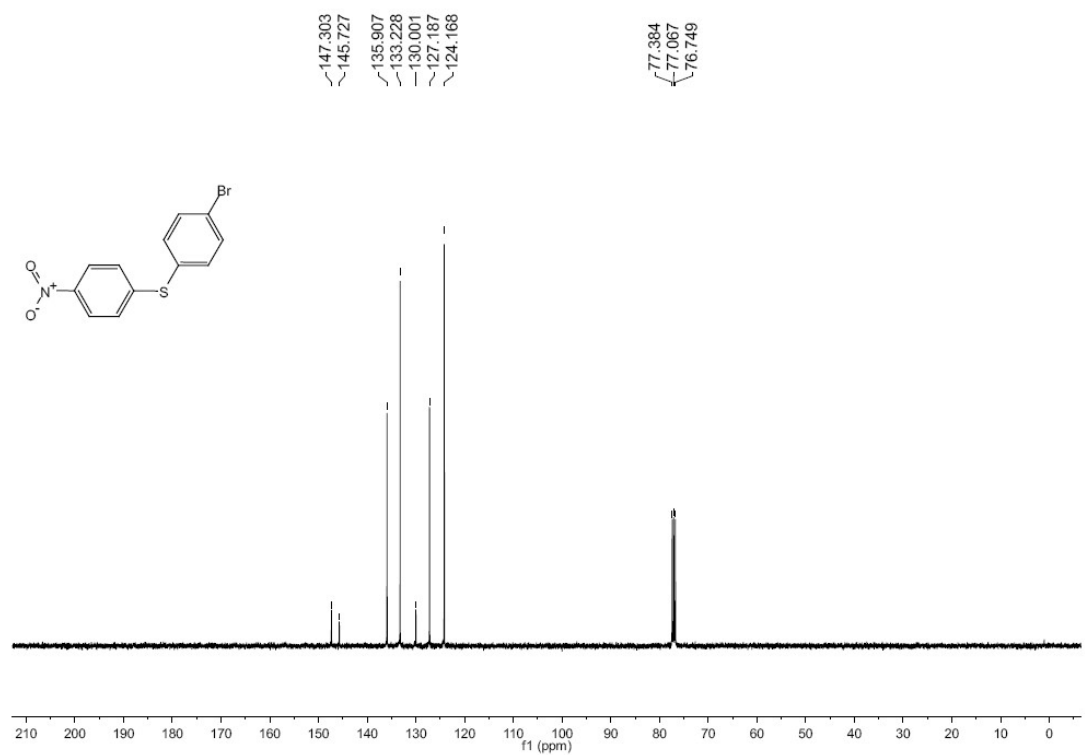

<sup>1</sup>H NMR and <sup>13</sup>C NMR spectra of compounds **4a'** (in CDCl<sub>3</sub>)





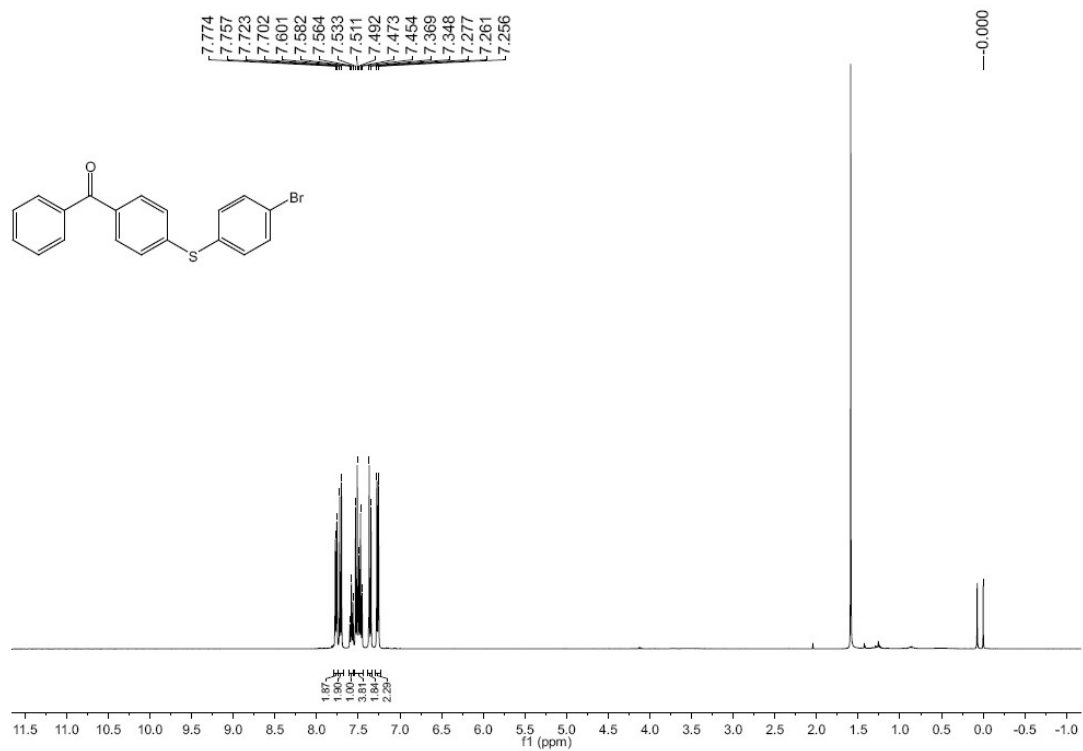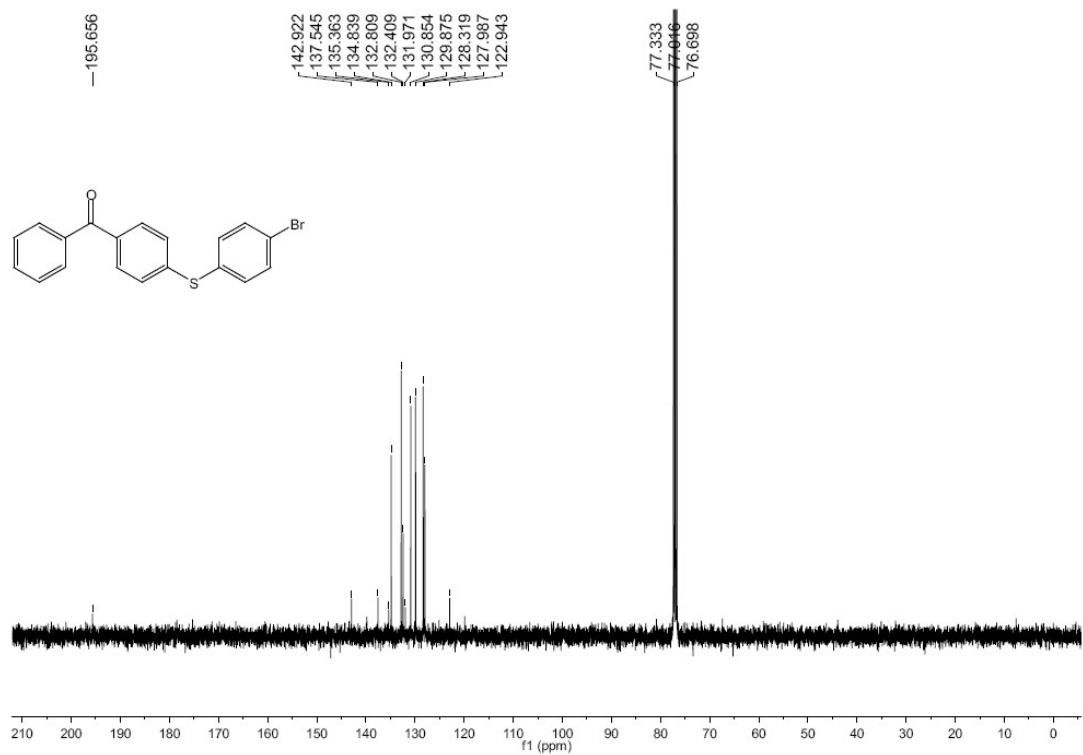

$^1\text{H}$  NMR and  $^{13}\text{C}$  NMR spectra of compounds **4c'** (in  $\text{CDCl}_3$ )
